# Supplementary material for: The photophysical properties of sulfone-based TADF emitters in relation to their structural properties
Source: Royal Society of Chemistry journal article supplement (doi:10.1039/d3cp03557c), 2023-01-01
Supplement: d3cp03557c1.pdf [file d3cp03557c1.pdf]

# Photophysical Properties of Sulfone-Based TADF Emitters In Relation To Their Structural Properties

Aslıhan Hepguler,<sup>a</sup> Pelin Ulukan,<sup>a</sup> Saron Catak<sup>a,\*</sup>

<sup>a</sup>Bogazici University, Department of Chemistry, Bebek, 34342, Istanbul, Turkey

## Contents

### List of Tables

|                                                                                                                                                       |    |
|-------------------------------------------------------------------------------------------------------------------------------------------------------|----|
| <b>Table S1</b> 3D representations of the ground state structures of all molecules, optimized at M06-2X/6-31+G(d,p) level of theory in toluene.....   | 3  |
| <b>Table S2</b> Torsion angles of the Group 1 emitters computed at M06-2X/6-31+G(d,p) level of theory.....                                            | 21 |
| <b>Table S3</b> Torsion angles of the Group 1 emitters computed at M06-2X/6-31+G(d,p) level of theory.....                                            | 22 |
| <b>Table S4</b> Torsion angles of the emitters with TXO2 and DBTO acceptor moieties computed at M06-2X/6-31+G(d,p) level of theory.....               | 23 |
| <b>Table S5</b> Torsion angles of Group 4 emitters computed at M06-2X/6-31+G(d,p) level of theory.....                                                | 24 |
| <b>Table S6</b> Torsion angles of Group 5 emitters computed at M06-2X/6-31+G(d,p) level of theory.....                                                | 24 |
| <b>Table S7</b> Energies, oscillator strengths and $\Phi_s$ indices of m-Cz-DPS-Cz emitter calculated at wB97XD/6-31+G(d,p) level of theory.....      | 25 |
| <b>Table S8</b> Energies, oscillator strengths and $\Phi_s$ indices of m-DMAC-DPS-DMAC emitter calculated at wB97XD/6-31+G(d,p) level of theory.....  | 25 |
| <b>Table S9</b> Energies, oscillator strengths and $\Phi_s$ indices of m-DPA-DPS-DPA emitter calculated at wB97XD/6-31+G(d,p) level of theory.....    | 25 |
| <b>Table S10</b> Energies, oscillator strengths and $\Phi_s$ indices of m-PTZ-DPS-PTZ emitter calculated at wB97XD/6-31+G(d,p) level of theory.....   | 26 |
| <b>Table S11</b> Energies, oscillator strengths and $\Phi_s$ indices of m-PXZ-DPS-PXZ emitter calculated at wB97XD/6-31+G(d,p) level of theory.....   | 26 |
| <b>Table S12</b> Energies, oscillator strengths and $\Phi_s$ indices of p-Cz-DPS-Cz emitter calculated at wB97XD/6-31+G(d,p) level of theory.....     | 26 |
| <b>Table S13</b> Energies, oscillator strengths and $\Phi_s$ indices of p-DMAC-DPS-DMAC emitter calculated at wB97XD/6-31+G(d,p) level of theory..... | 27 |
| <b>Table S14</b> Energies, oscillator strengths and $\Phi_s$ indices of p-DPA-DPS-DPA emitter calculated at wB97XD/6-31+G(d,p) level of theory.....   | 27 |
| <b>Table S15</b> Energies, oscillator strengths and $\Phi_s$ indices of p-PTZ-DPS-PTZ emitter calculated at wB97XD/6-31+G(d,p) level of theory.....   | 27 |
| <b>Table S16</b> Energies, oscillator strengths and $\Phi_s$ indices of p-PXZ-DPS-PXZ emitter calculated at wB97XD/6-31+G(d,p) level of theory.....   | 28 |
| <b>Table S17</b> Energies, oscillator strengths and $\Phi_s$ indices of DBTO-ACR emitter calculated at wB97XD/6-31+G(d,p) level of theory.....        | 28 |
| <b>Table S18</b> Energies, oscillator strengths and $\Phi_s$ indices of DBTO-NO emitter calculated at wB97XD/6-31+G(d,p) level of theory.....         | 28 |
| <b>Table S19</b> Energies, oscillator strengths and $\Phi_s$ indices of DMAC-TTR emitter calculated at wB97XD/6-31+G(d,p) level of theory.....        | 29 |
| <b>Table S20</b> Energies, oscillator strengths and $\Phi_s$ indices of PXZ-TTR emitter calculated at wB97XD/6-                                       |    |

|                                                                                                                                                                                                                                           |    |
|-------------------------------------------------------------------------------------------------------------------------------------------------------------------------------------------------------------------------------------------|----|
| 31+G(d,p) level of theory.....                                                                                                                                                                                                            | 29 |
| <b>Table S21</b> Oscillator strengths for singlet excitations of Group 1 and Group 2 emitters computed at M06-2X/6-31+G(d,p) level of theory.....                                                                                         | 35 |
| <b>Table S22</b> Experimental and calculated energy gaps and, and root mean square coupling element ( $ \langle S_1   H^{SOC}   T_n \rangle $ ) for $T_n \rightarrow S_1$ transition.....                                                 | 35 |
| <b>Table S23</b> Natures of $S_1$ , $T_1$ - $T_5$ states of the emitters in Group 1 and Group 2 computed at M062X/6-31+G(d,p) level of theory in toluene.....                                                                             | 36 |
| <b>Table S24</b> Natures of $S_1$ , $T_1$ - $T_5$ states computed at M062X/6-31+G(d,p) level of theory in toluene (TXO2-PXZ, p-PXZ-DPS-PXZ, TXO2-DMAC, p-DMAC-DPS-DMAC, DBTO-DMAC) and in dichloromethane (DBTO-PXZ).....                 | 36 |
| <b>Table S25</b> Natures of $S_1$ , $T_1$ - $T_5$ states computed at M062X/6-31+G(d,p) level of theory in toluene (for Cz-Ph-TTR, DMAC-TTR, DMAC-Ph-TTR, PXZ-TTR, PXZ-Ph-TTR, PTZ-TTR, PTZ-Ph-TTR) and in ethyl ethanoate (Cz-TTR). ..... | 36 |
| <b>Table S26</b> Reorganization energies (kcal/mol) between the $S_1$ and $T_1$ geometries of selected compounds. ....                                                                                                                    | 37 |
| <b>Table S27</b> Electron and hole orbitals of sulfone based emitters computed from ground state geometries at M062X/6-31+G(d,p) level of theory .....                                                                                    | 38 |
| <b>Table S28</b> Experimental absorption wavelengths of the modeled sulfone based TADF emitters.....                                                                                                                                      | 40 |
| <b>Table S29</b> Relative energies of the different conformers of the emitters <i>m</i> -Cz-DPS-Cz and <i>m</i> -PTZ-DPS-PTZ computed at M06-2X/6-31+G(d,p) level of theory.....                                                          | 42 |
| <b>Table S30</b> Relative energies of the different conformers of the emitters <i>m</i> -Cz-DPS-Cz and <i>m</i> -PTZ-DPS-PTZ computed at M06-2X/6-31+G(d,p) level of theory.....                                                          | 43 |
| <b>Table S31</b> Relative energies of the different conformers of the emitter <i>m</i> -DPA-DPS-DPA computed at M06-2X/6-31+G(d,p) level of theory.....                                                                                   | 44 |
| <b>Table S32</b> Relative energies of the different conformers of Group 2 emitters computed at M06-2X/6-31+G(d,p) level of theory.....                                                                                                    | 44 |
| <b>Table S33</b> Relative energies of the different conformers of Group 3 emitters computed at M06-2X/6-31+G(d,p) level of theory.....                                                                                                    | 45 |
| <b>Table S34</b> Relative energies of the different conformers of Group 4 emitters computed at M06-2X/6-31+G(d,p) level of theory .....                                                                                                   | 45 |
| <b>Table S35</b> Relative energies of the different conformers of Group 5 emitters computed at M06-2X/6-31+G(d,p) level of theory.....                                                                                                    | 46 |

## List of Figures

|                                                                                                                                                                                     |    |
|-------------------------------------------------------------------------------------------------------------------------------------------------------------------------------------|----|
| <b>Figure S1</b> Torsion angle coding of the Group 1 emitters computed at M06-2X/6-31+G(d,p) level of theory .....                                                                  | 21 |
| <b>Figure S2</b> Torsion angle coding of the Group 2 emitters computed at M06-2X/6-31+G(d,p) level of theory .....                                                                  | 22 |
| <b>Figure S3</b> Torsion angle coding of the emitters with TXO2 and DBTO acceptor moieties computed at M06-2X/6-31+G(d,p) level of theory .....                                     | 23 |
| <b>Figure S4</b> Torsion angle coding of Group 4 emitters computed at M06-2X/6-31+G(d,p) level of theory...24                                                                       |    |
| <b>Figure S5</b> Torsion angle coding of Group 5 emitters computed at M06-2X/6-31+G(d,p) level of theory...24                                                                       |    |
| <b>Figure S6</b> A) Relation between the torsion angle and $\Delta E_{ST}$ , B) Relation between the torsion angle and $E_g$ .29                                                    |    |
| <b>Figure S7</b> Absorption Spectra of Sulfone Based TADF Emitters computed at B3LYP/6-31+G(d,p), M06-2X/6-31+G(d,p), PBE0/6-31+G(d,p) and BLYP/6-31+G(d,p) level of theories. .... | 36 |
| <b>Cartesian Coordinates</b> .....                                                                                                                                                  | 47 |

**Table S1** 3D representations of the ground state structures of all molecules, optimized at M06-2X/6-31+G(d,p) level of theory in toluene.

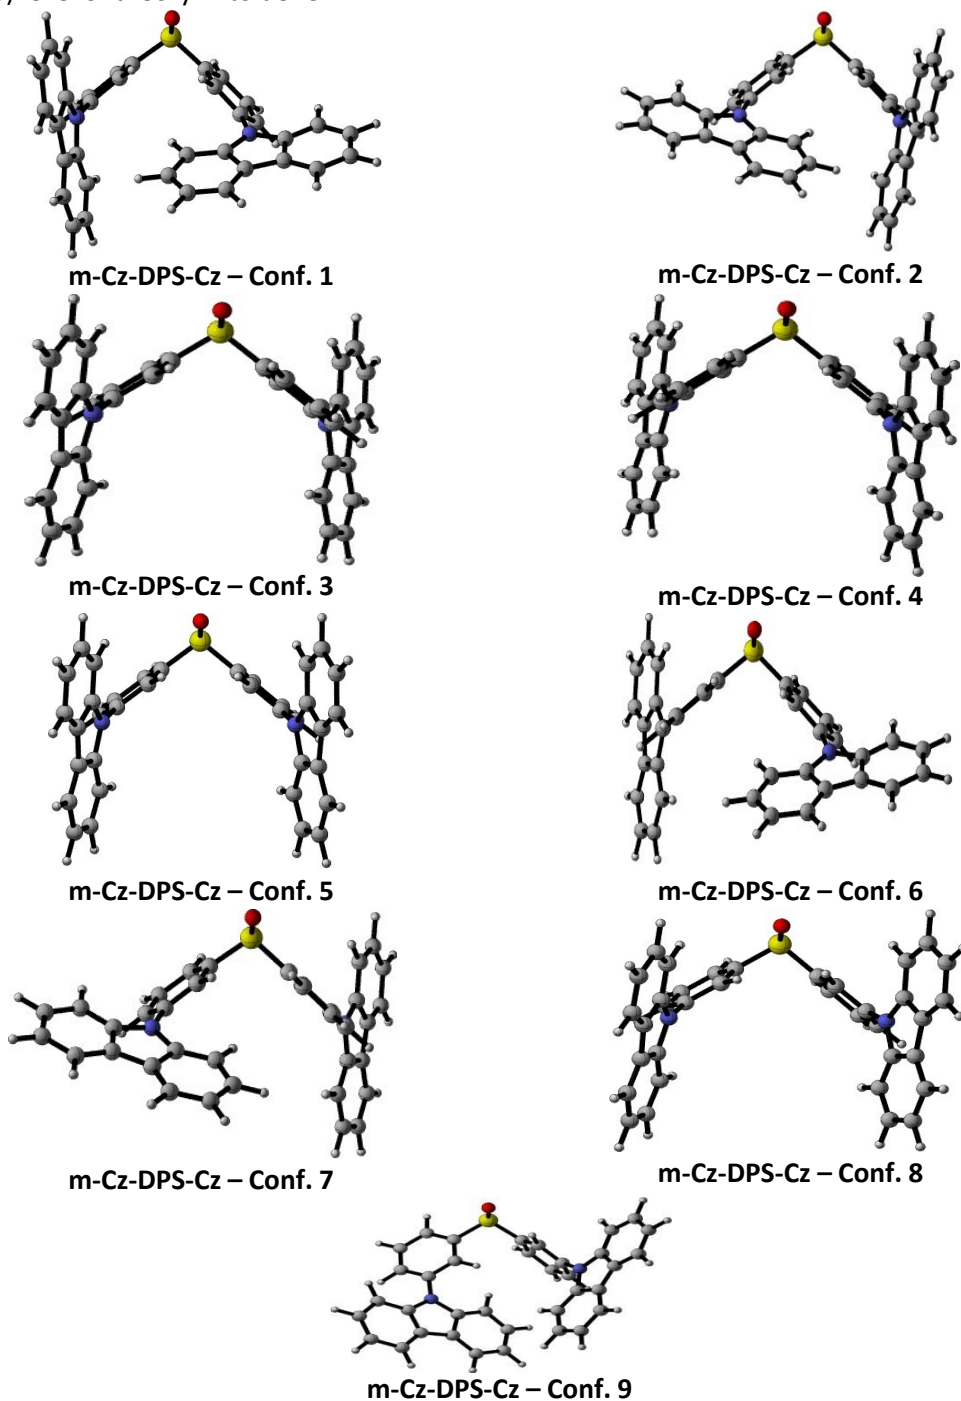

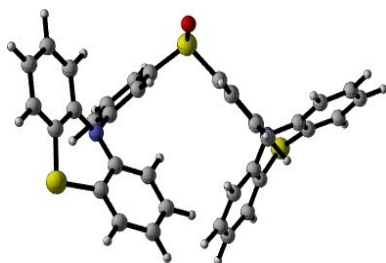

m-PTZ-DPS-PTZ – Conf. 1

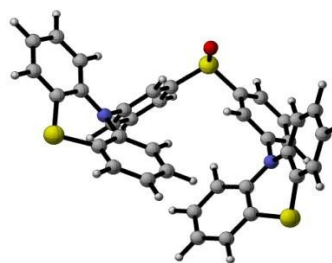

m-PTZ-DPS-PTZ – Conf. 2

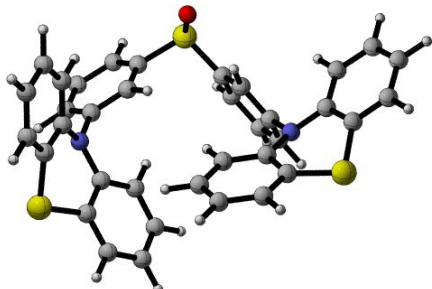

m-PTZ-DPS-PTZ – Conf. 3

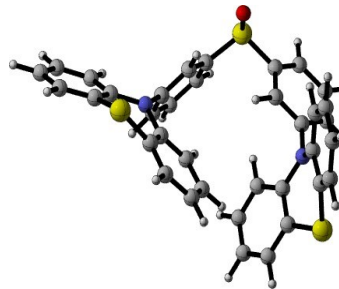

m-PTZ-DPS-PTZ – Conf. 4

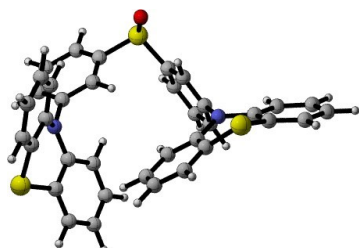

m-PTZ-DPS-PTZ – Conf. 5

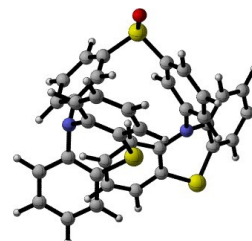

m-PTZ-DPS-PTZ – Conf. 6

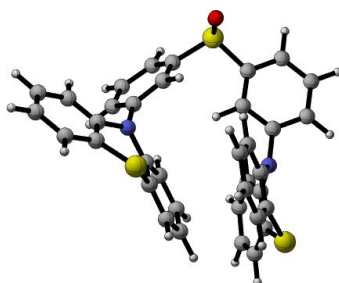

m-PTZ-DPS-PTZ – Conf. 7

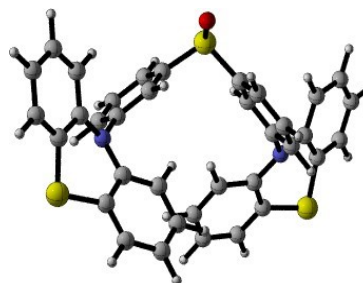

m-PTZ-DPS-PTZ – Conf. 8

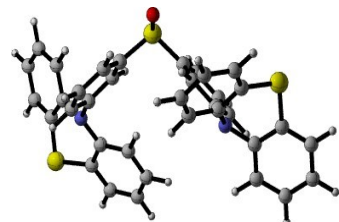

m-PTZ-DPS-PTZ – Conf. 9

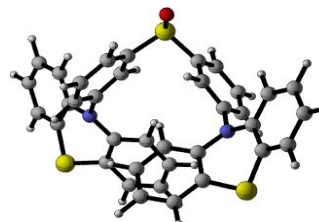

m-PTZ-DPS-PTZ – Conf. 10

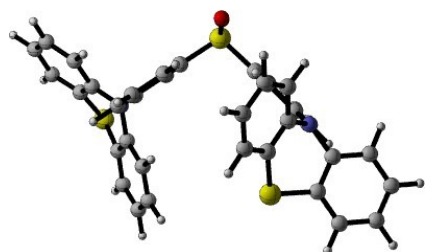

**m-PTZ-DPS-PTZ – Conf. 11**

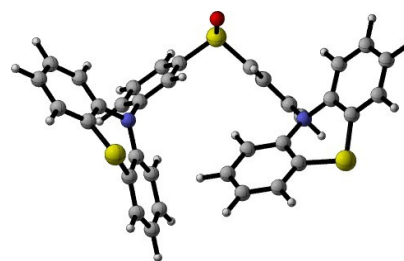

**m-PTZ-DPS-PTZ – Conf. 12**

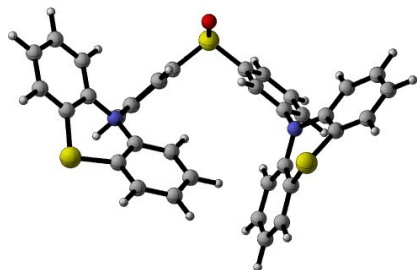

**m-PTZ-DPS-PTZ – Conf. 13**

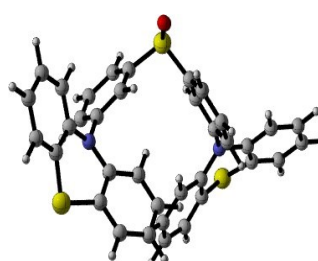

**m-PTZ-DPS-PTZ – Conf. 14**

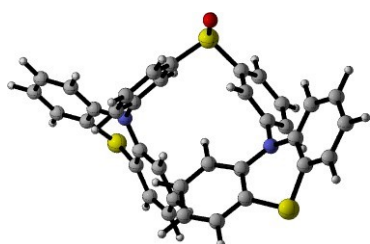

**m-PTZ-DPS-PTZ – Conf. 15**

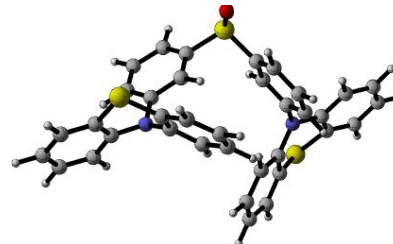

**m-PTZ-DPS-PTZ – Conf. 16**

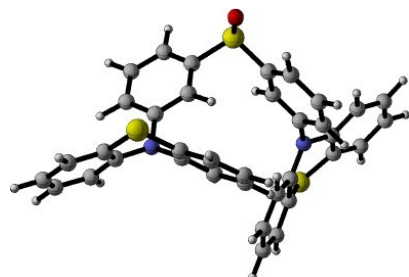

**m-PTZ-DPS-PTZ – Conf. 17**

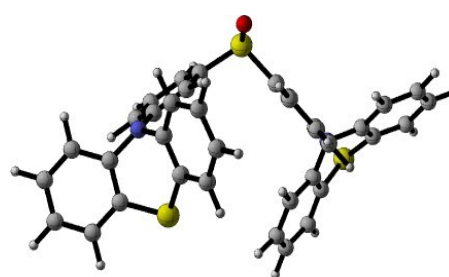

**m-PTZ-DPS-PTZ – Conf. 18**

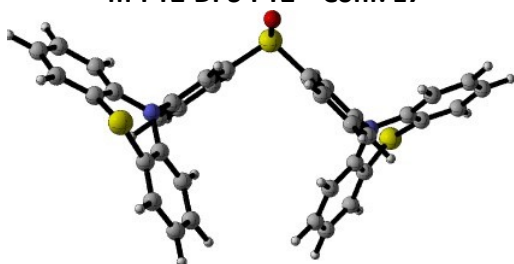

**m-PTZ-DPS-PTZ – Conf. 19**

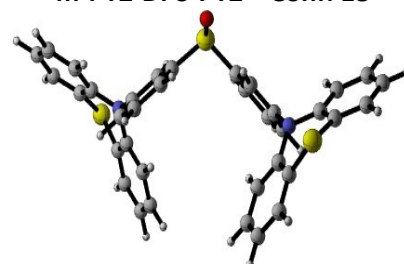

**m-PTZ-DPS-PTZ – Conf. 20**

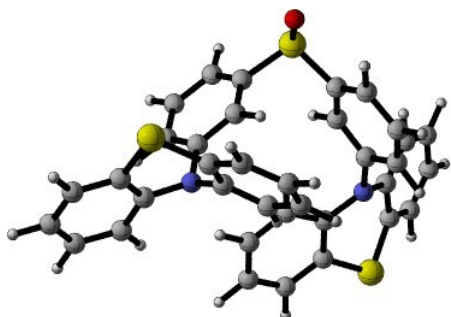

m-PTZ-DPS-PTZ – Conf. 21

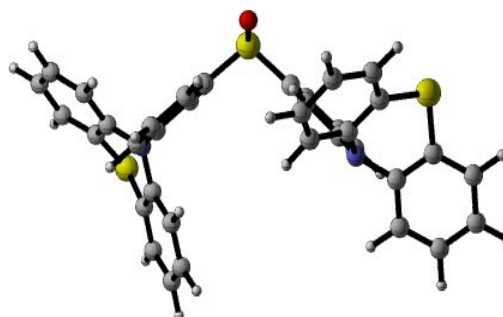

m-PTZ-DPS-PTZ – Conf. 22

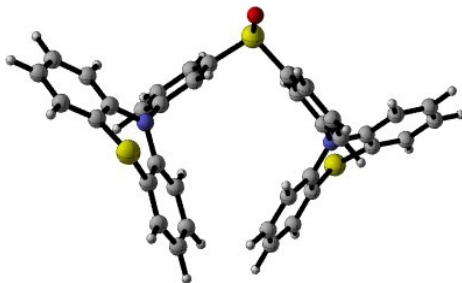

m-PTZ-DPS-PTZ – Conf. 23

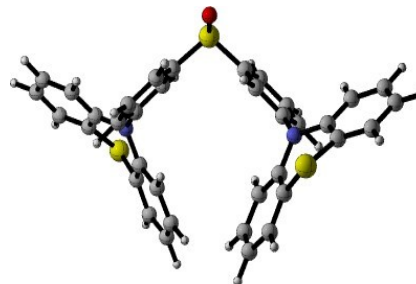

m-PTZ-DPS-PTZ – Conf. 24

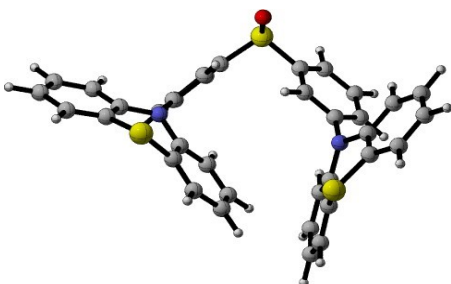

m-PTZ-DPS-PTZ – Conf. 25

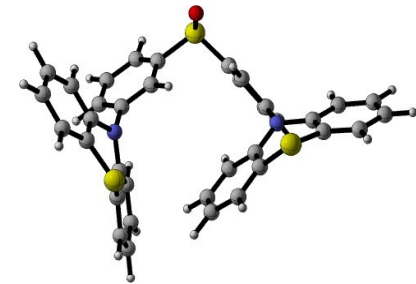

m-PTZ-DPS-PTZ – Conf. 26

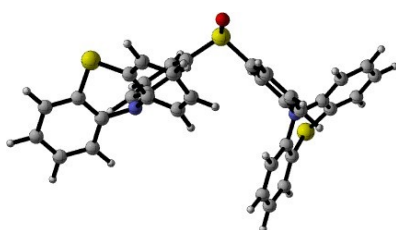

m-PTZ-DPS-PTZ – Conf. 27

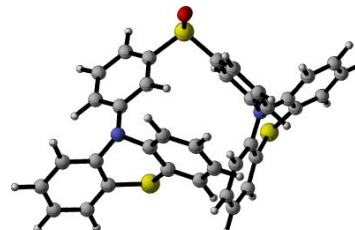

m-PTZ-DPS-PTZ – Conf. 28

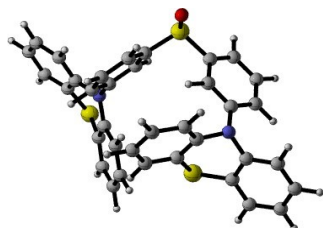

m-PTZ-DPS-PTZ – Conf. 29

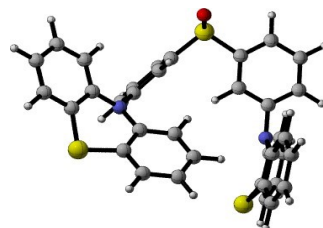

m-PTZ-DPS-PTZ – Conf. 30

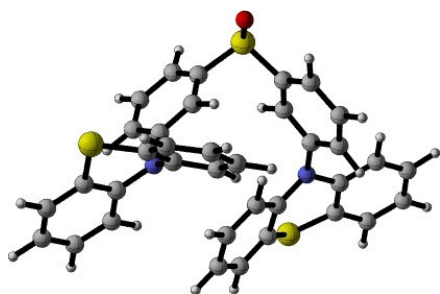

**m-PTZ-DPS-PTZ – Conf. 31**

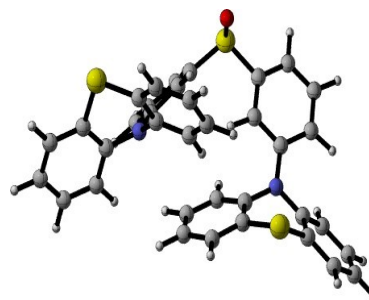

**m-PTZ-DPS-PTZ – Conf. 32**

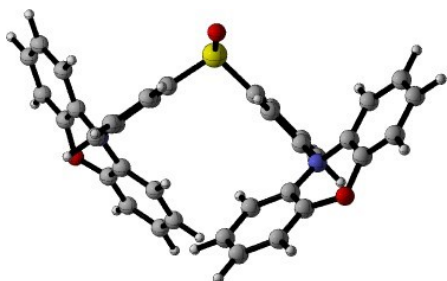

**m-PXZ-DPS-PXZ – Conf. 1**

**m-PXZ-DPS-PXZ – Conf. 3**

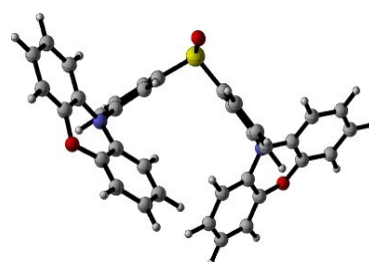

**m-PXZ-DPS-PXZ – Conf. 2**

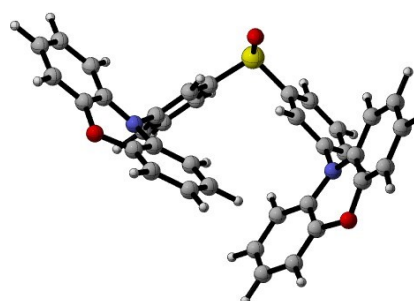

**m-PXZ-DPS-PXZ – Conf. 4**

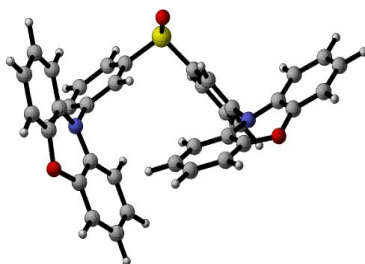

**m-PXZ-DPS-PXZ – Conf. 5**

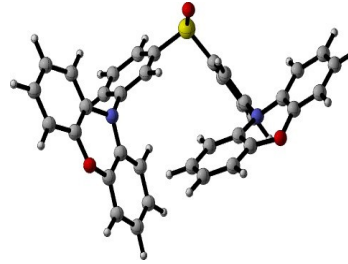

**m-PXZ-DPS-PXZ – Conf. 6**

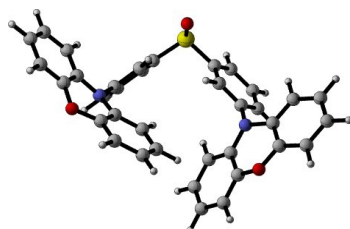

**m-PXZ-DPS-PXZ – Conf. 7**

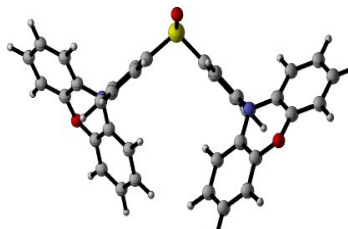

**m-PXZ-DPS-PXZ – Conf. 8**



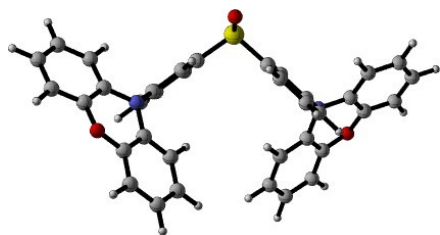

m-PXZ-DPS-PXZ – Conf. 9

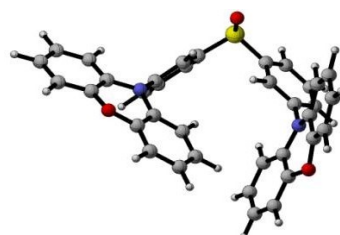

m-PXZ-DPS-PXZ – Conf. 10

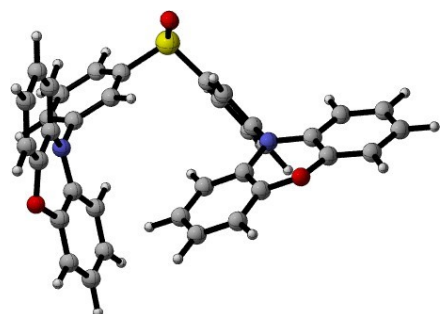

m-PXZ-DPS-PXZ – Conf. 11

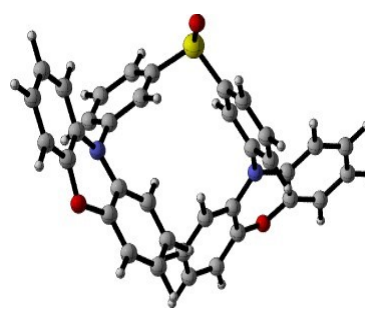

m-PXZ-DPS-PXZ – Conf. 12

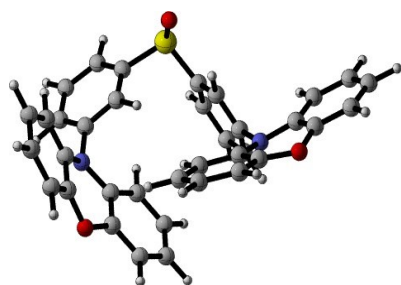

m-PXZ-DPS-PXZ – Conf. 13

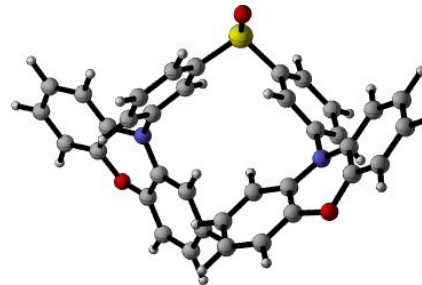

m-PXZ-DPS-PXZ – Conf. 14

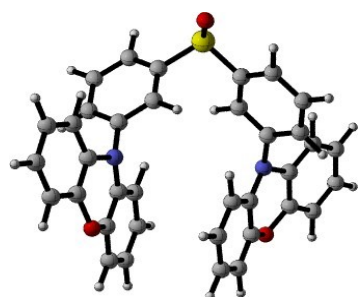

m-PXZ-DPS-PXZ – Conf. 15

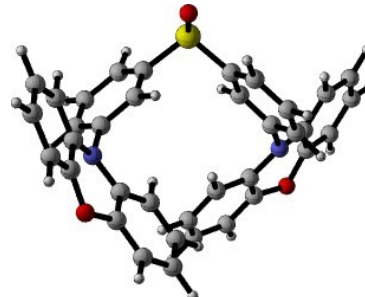

m-PXZ-DPS-PXZ – Conf. 16

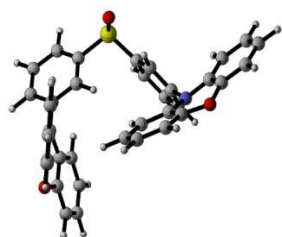

m-PXZ-DPS-PXZ – Conf. 17

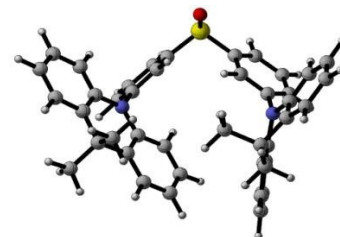

m-DMAC-DPS-DMAC – Conf. 1



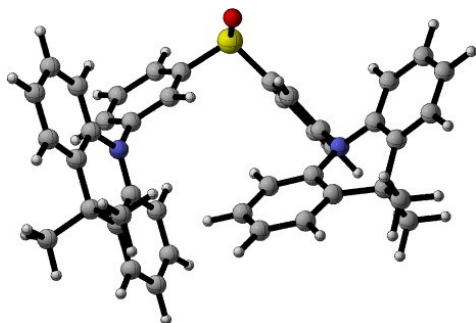

m-DMAC-DPS-DMAC – Conf. 2

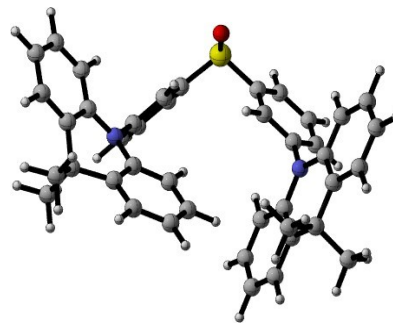

m-DMAC-DPS-DMAC – Conf. 3

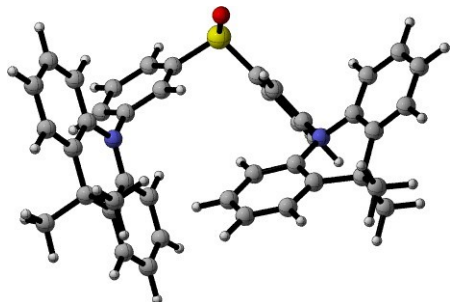

m-DMAC-DPS-DMAC – Conf. 4

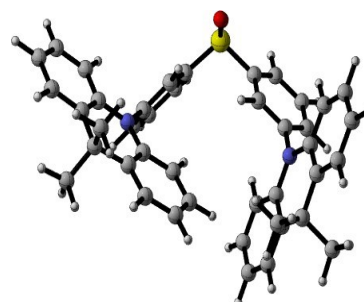

m-DMAC-DPS-DMAC – Conf. 5

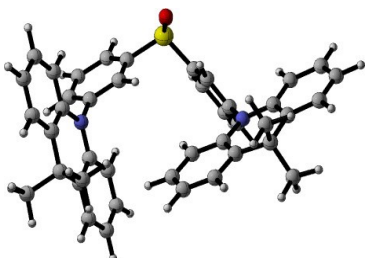

m-DMAC-DPS-DMAC – Conf. 6

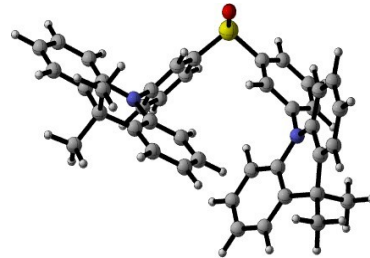

m-DMAC-DPS-DMAC – Conf. 7

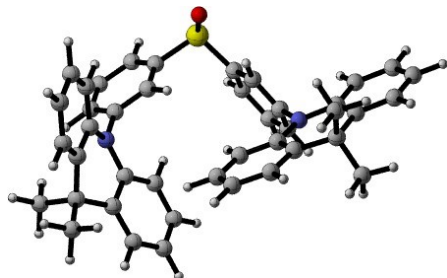

m-DMAC-DPS-DMAC – Conf. 8

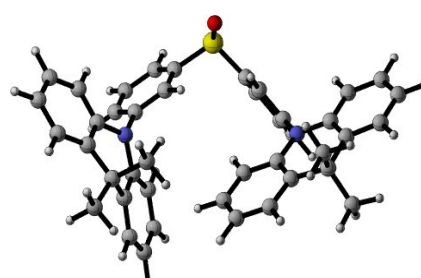

m-DMAC-DPS-DMAC – Conf. 9

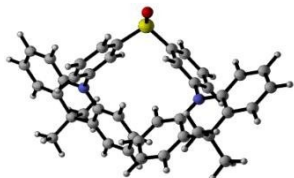

m-DMAC-DPS-DMAC – Conf. 10

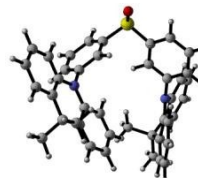

m-DMAC-DPS-DMAC – Conf. 11

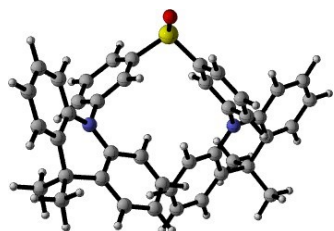

m-DMAC-DPS-DMAC – Conf. 12

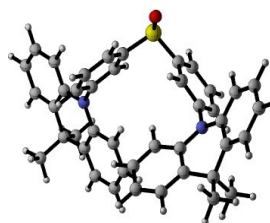

m-DMAC-DPS-DMAC – Conf. 13

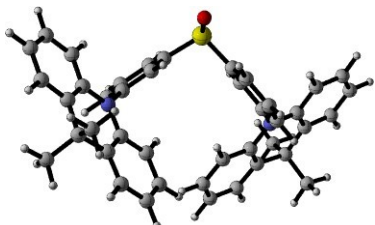

m-DMAC-DPS-DMAC – Conf. 14

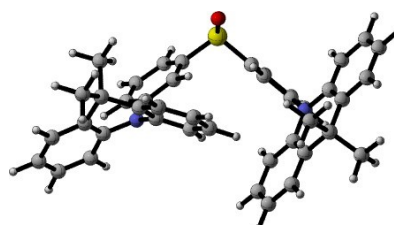

m-DMAC-DPS-DMAC – Conf. 15

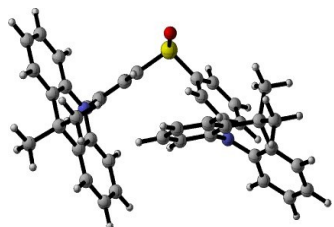

m-DMAC-DPS-DMAC – Conf. 16

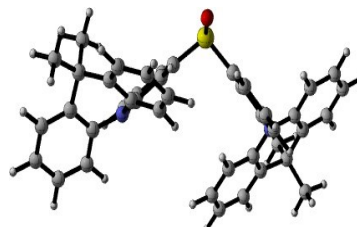

m-DMAC-DPS-DMAC – Conf. 17

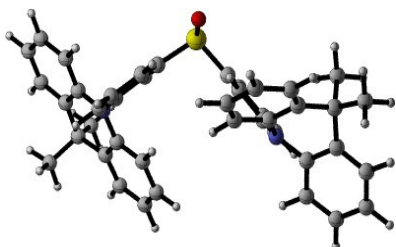

m-DMAC-DPS-DMAC – Conf. 18

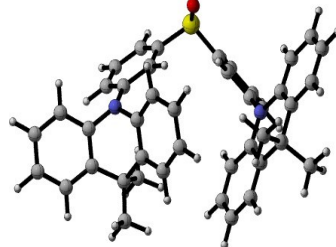

m-DMAC-DPS-DMAC – Conf. 19

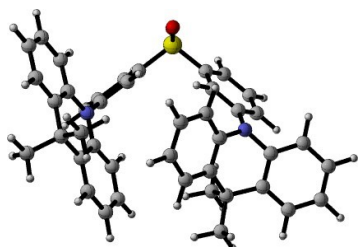

m-DMAC-DPS-DMAC – Conf. 20

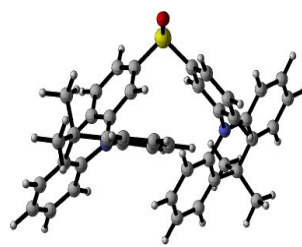

m-DMAC-DPS-DMAC – Conf. 21

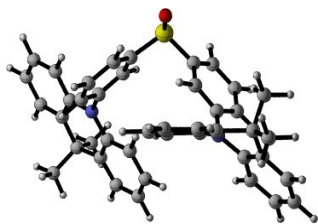

m-DMAC-DPS-DMAC – Conf. 22

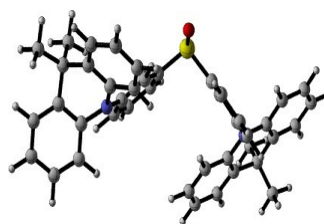

m-DMAC-DPS-DMAC – Conf. 23

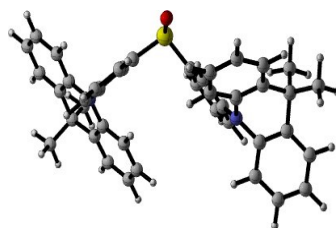

m-DMAC-DPS-DMAC – Conf. 24

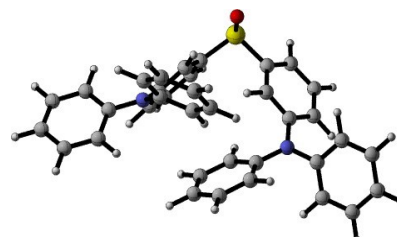

m-DPA-DPS-DPA – Conf. 1

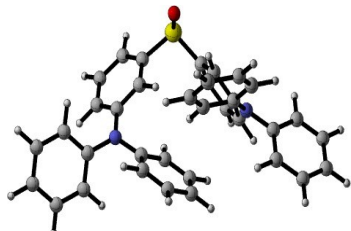

m-DPA-DPS-DPA – Conf. 2

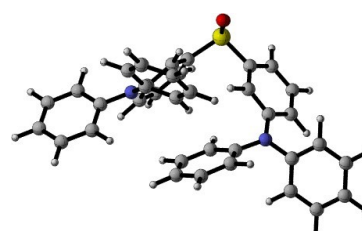

m-DPA-DPS-DPA – Conf. 3

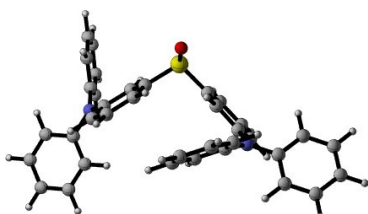

m-DPA-DPS-DPA – Conf. 4

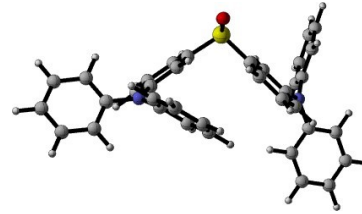

m-DPA-DPS-DPA – Conf. 5

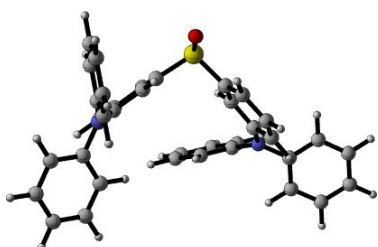

m-DPA-DPS-DPA – Conf. 6

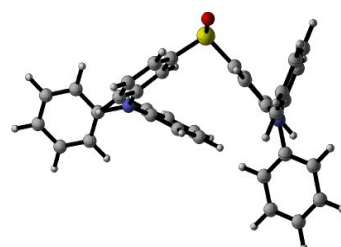

m-DPA-DPS-DPA – Conf. 7

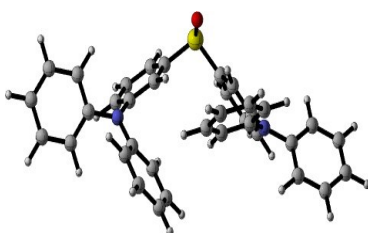

m-DPA-DPS-DPA – Conf. 8

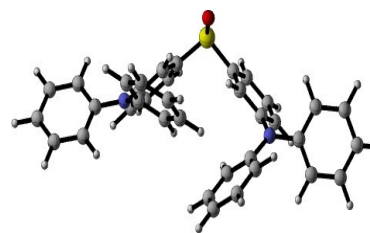

m-DPA-DPS-DPA – Conf. 9

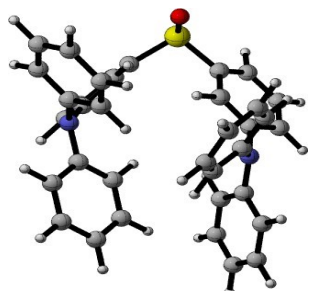

m-DPA-DPS-DPA – Conf. 10

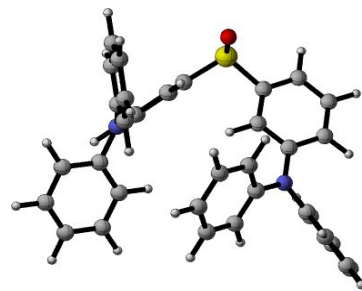

m-DPA-DPS-DPA – Conf. 11

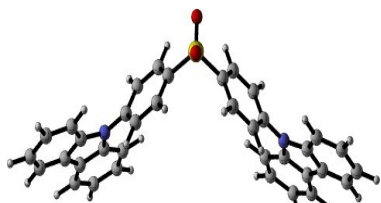

**p-Cz-DPS-Cz – Conf. 1**

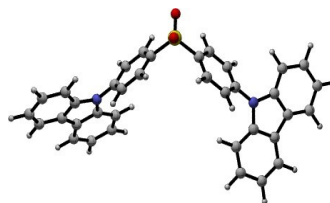

**p-Cz-DPS-Cz – Conf. 2**

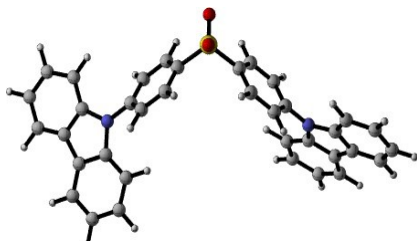

**p-Cz-DPS-Cz – Conf. 3**

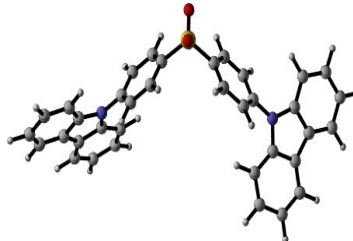

**p-Cz-DPS-Cz – Conf. 4**

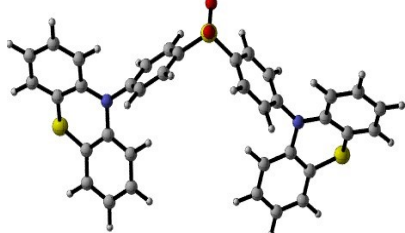

**p-PTZ-DPS-PTZ – Conf. 1**

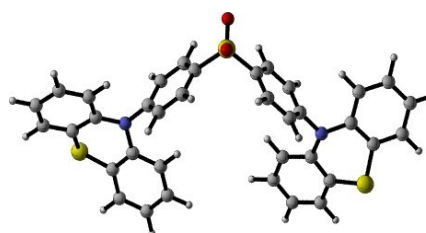

**p-PTZ-DPS-PTZ – Conf. 2**

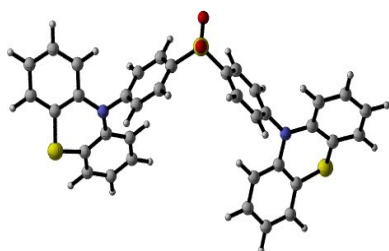

**p-PTZ-DPS-PTZ – Conf. 3**

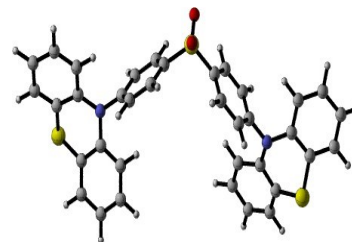

**p-PTZ-DPS-PTZ – Conf. 4**

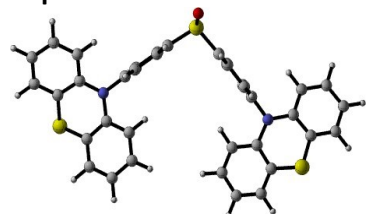

**p-PTZ-DPS-PTZ – Conf. 5**

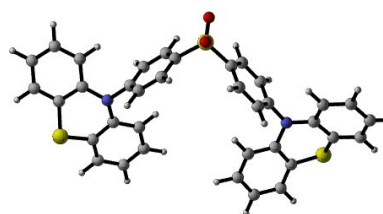

**p-PTZ-DPS-PTZ – Conf. 6**

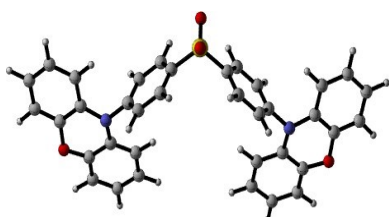

**p-PXZ-DPS-PXZ – Conf. 1**

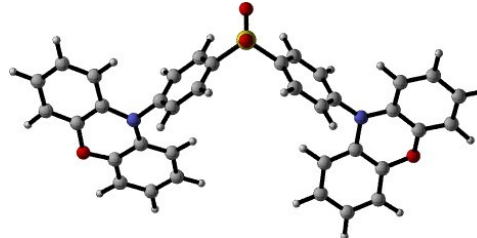

**p-PXZ-DPS-PXZ – Conf. 2**

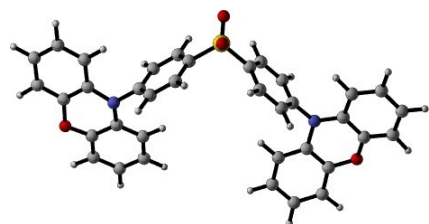

**p-PXZ-DPS-PXZ – Conf. 3**

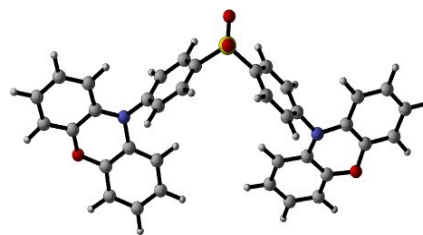

**p-PXZ-DPS-PXZ – Conf. 4**

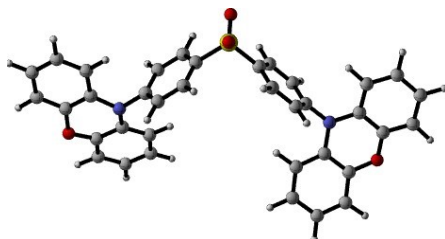

**p-PXZ-DPS-PXZ – Conf. 5**

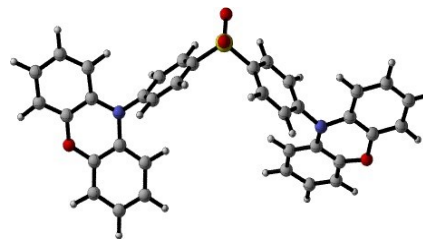

**p-PXZ-DPS-PXZ – Conf. 6**

**p-DMAC-DPS-DMAC – Conf. 1**

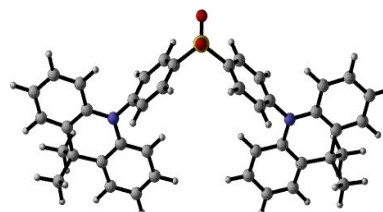

**p-DMAC-DPS-DMAC – Conf. 2**

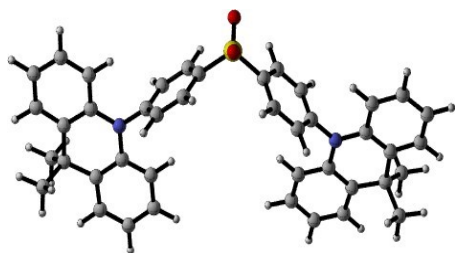

**p-DMAC-DPS-DMAC – Conf. 3**

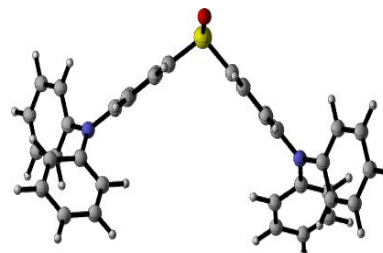

**p-DPA-DPS-DPA – Conf. 1**

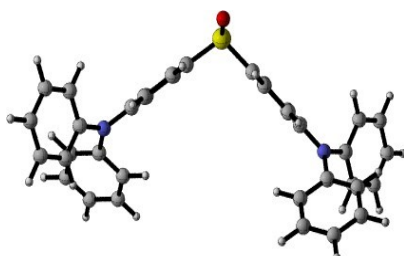

**p-DPA-DPS-DPA – Conf. 2**

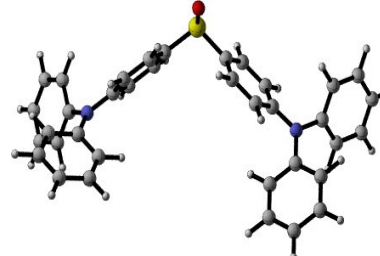

**p-DPA-DPS-DPA – Conf. 3**

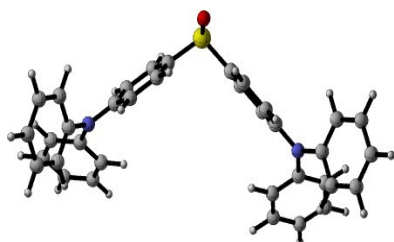

**p-DPA-DPS-DPA – Conf. 4**

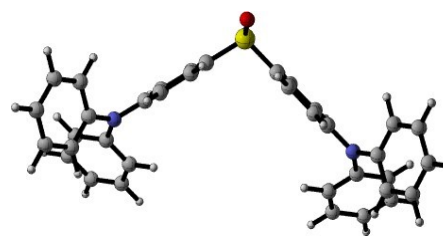

**p-DPA-DPS-DPA – Conf. 5**



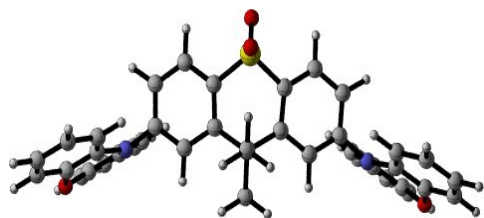

TXO2-NO – Conf. 1

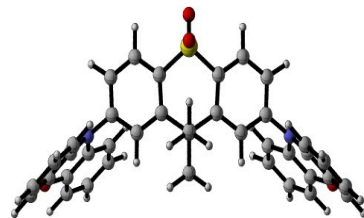

TXO2-NO – Conf. 2

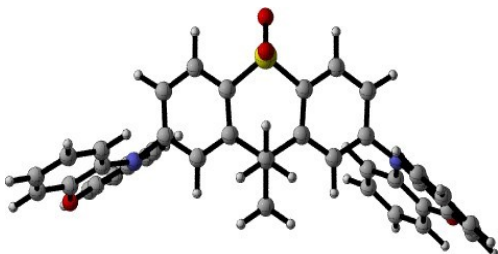

TXO2-NO – Conf. 3

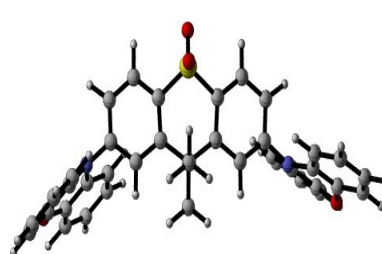

TXO2-NO – Conf. 4

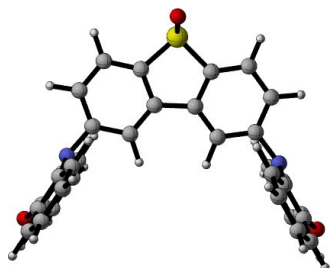

DBTO-NO – Conf. 1

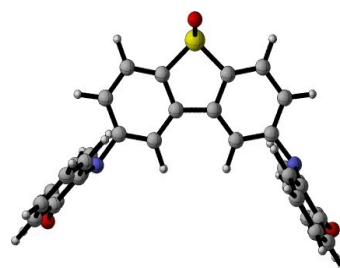

DBTO-NO – Conf. 2

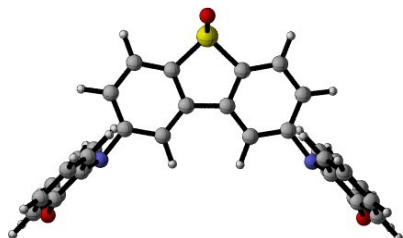

DBTO-NO – Conf. 3

DBTO-NO – Conf. 4

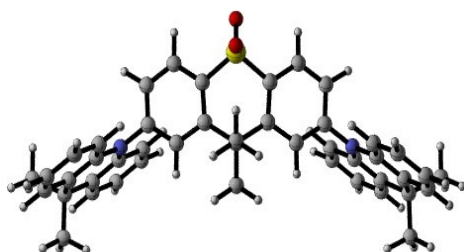

TXO2-ACR – Conf. 1

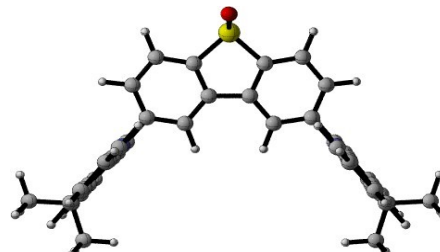

DBTO-ACR – Conf. 1

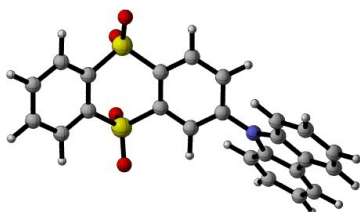

Cz-TTR – Conf. 1

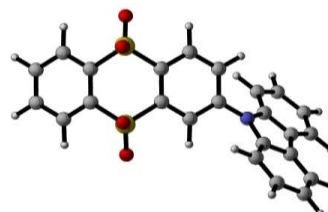

Cz-TTR – Conf. 2

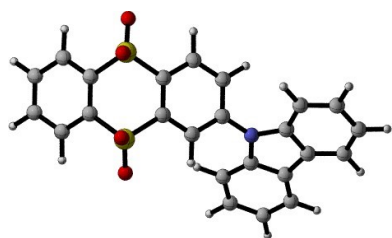

Cz-TTR – Conf. 3

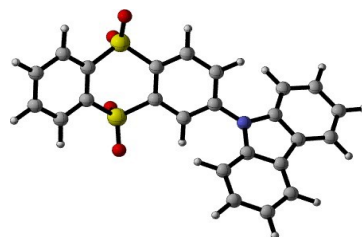

Cz-TTR – Conf. 4

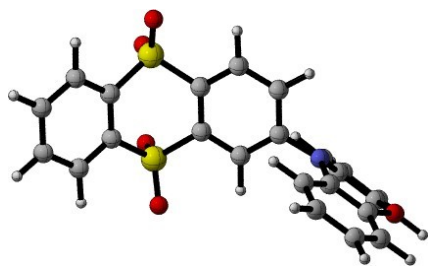

PXZ-TTR – Conf.1

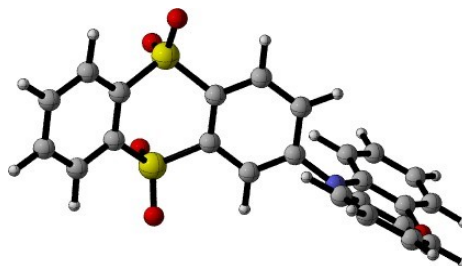

PXZ-TTR – Conf.2

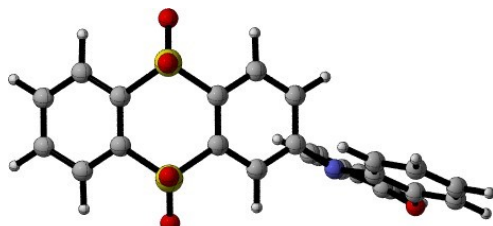

PXZ-TTR – Conf.3

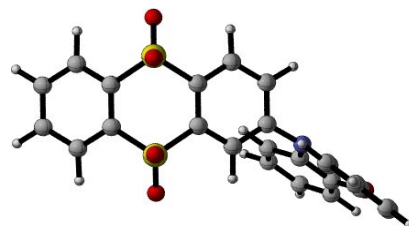

PXZ-TTR – Conf.4

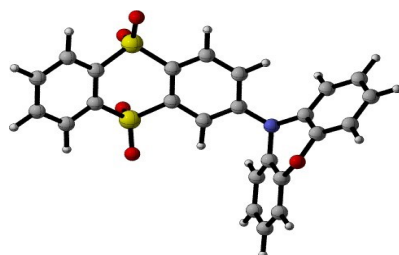

PXZ-TTR – Conf.5

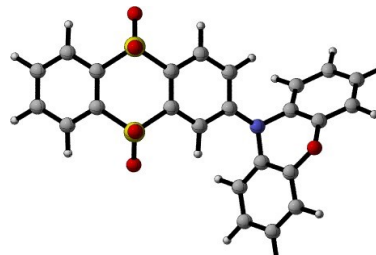

PXZ-TTR – Conf.6

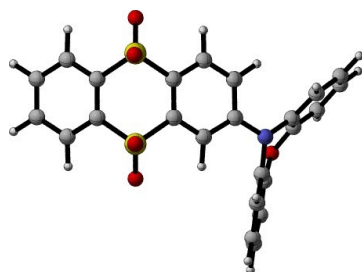

PXZ-TTR – Conf.7

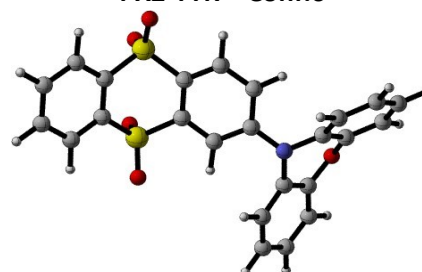

PXZ-TTR – Conf.8



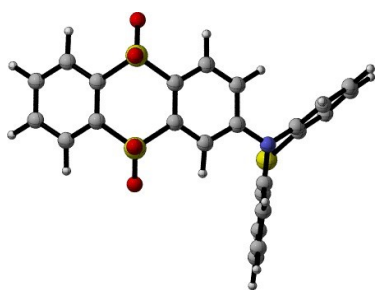

PTZ-TTR – Conf.1

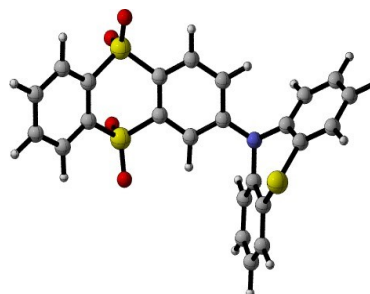

PTZ-TTR – Conf.2

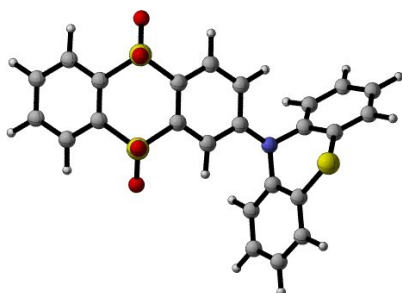

PTZ-TTR – Conf.3

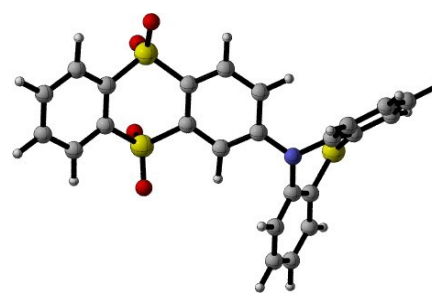

PTZ-TTR – Conf.4

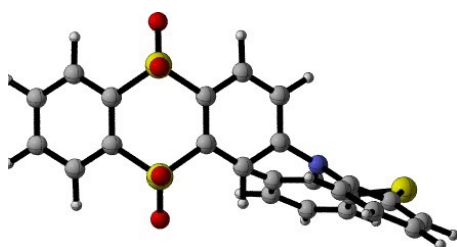

PTZ-TTR – Conf.5

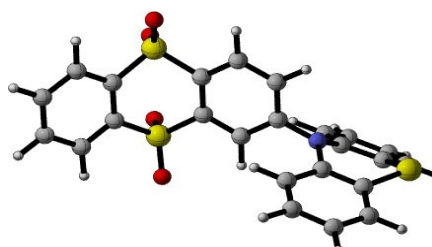

PTZ-TTR – Conf.6

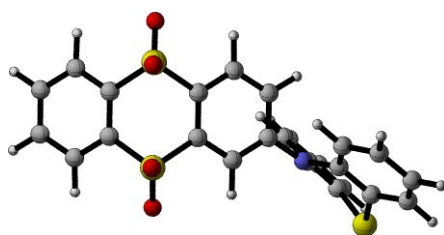

PTZ-TTR – Conf.7

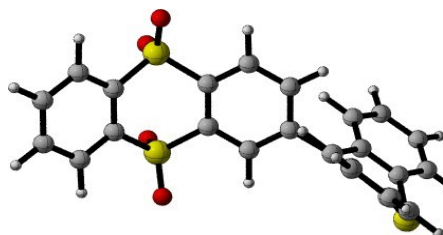

PTZ-TTR – Conf.8

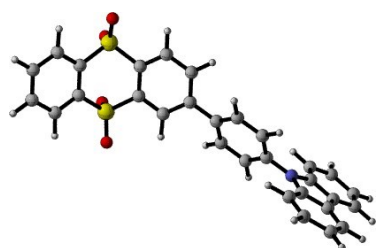

Cz-Ph-TTR – Conf.1

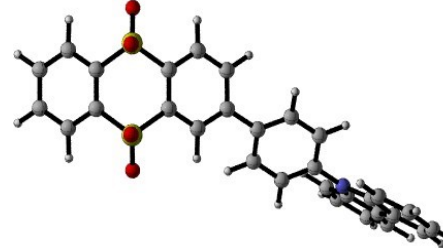

Cz-Ph-TTR – Conf.2

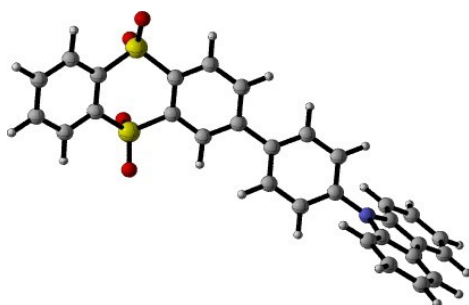**Cz-Ph-TTR – Conf.3**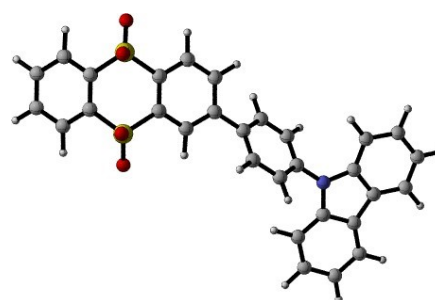**Cz-Ph-TTR – Conf.4**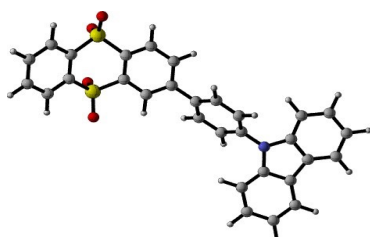**Cz-Ph-TTR – Conf.5**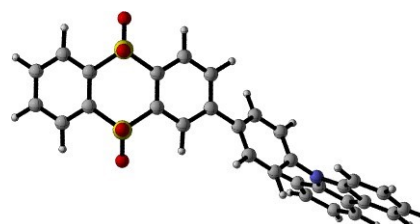**Cz-Ph-TTR – Conf.6**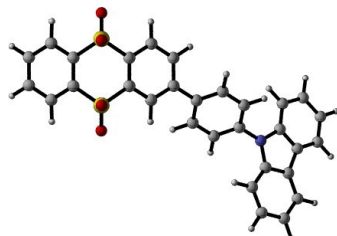**Cz-Ph-TTR – Conf.7**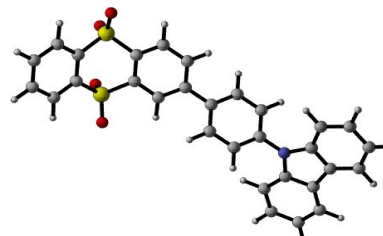**Cz-Ph-TTR – Conf.8**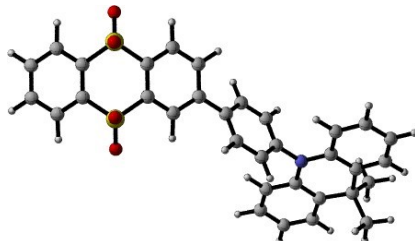**DMAC-Ph-TTR – Conf.1**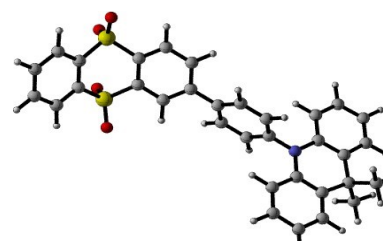**DMAC-Ph-TTR – Conf.2**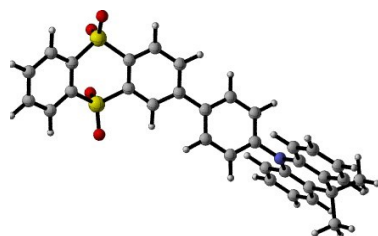**DMAC-Ph-TTR – Conf.3**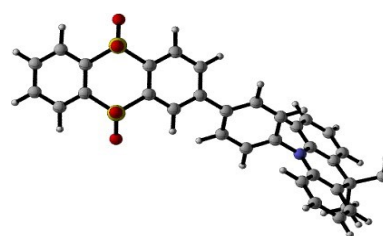**DMAC-Ph-TTR – Conf.4**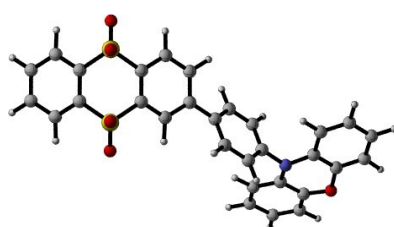**PXZ-Ph-TTR – Conf.1**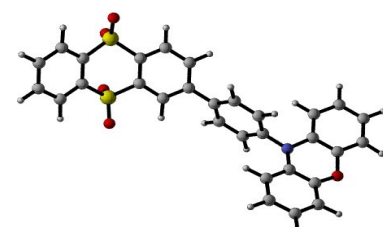**PXZ-Ph-TTR – Conf.2**

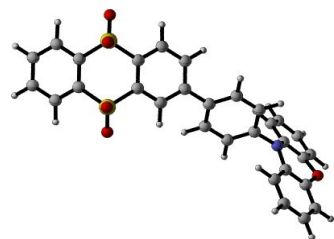**PXZ-Ph-TTR – Conf.3**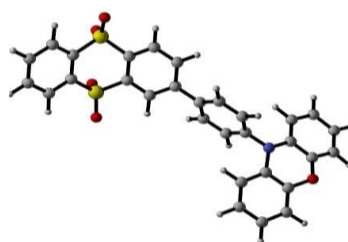**PXZ-Ph-TTR – Conf.4**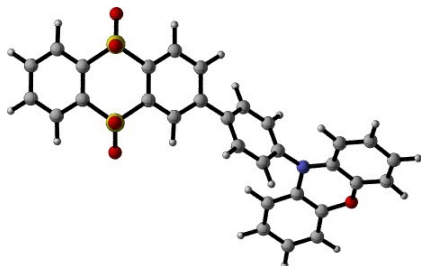**PXZ-Ph-TTR – Conf.5**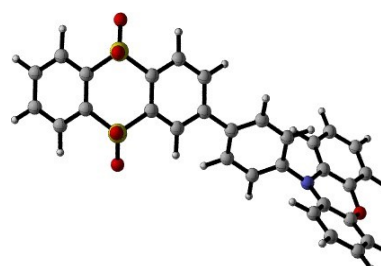**PXZ-Ph-TTR – Conf.6**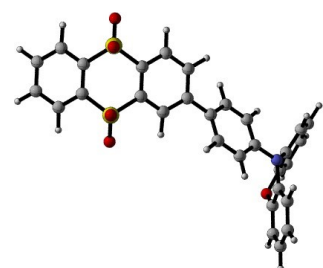**PXZ-Ph-TTR – Conf.7**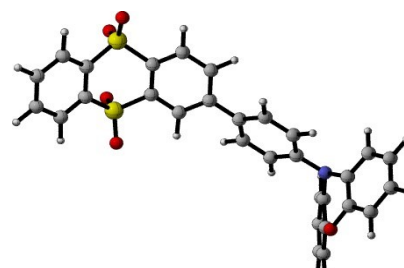**PXZ-Ph-TTR – Conf.8**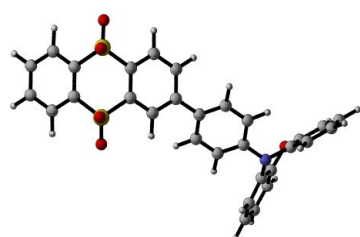**PXZ-Ph-TTR – Conf.9**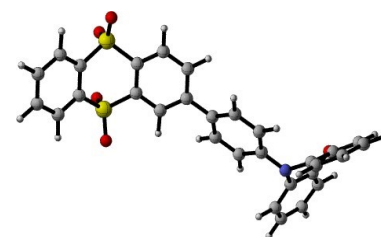**PXZ-Ph-TTR – Conf.10**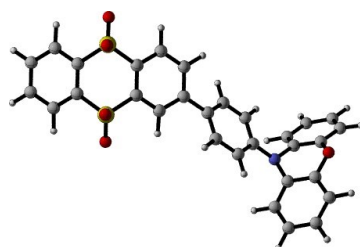**PXZ-Ph-TTR – Conf.11**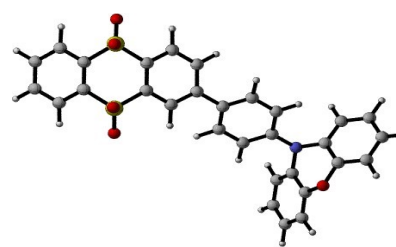**PXZ-Ph-TTR – Conf.12**

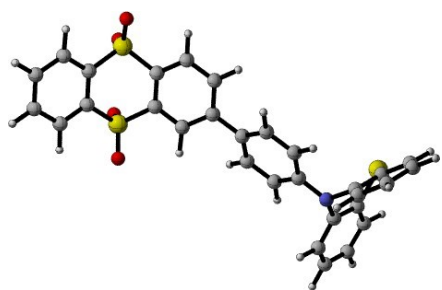

PTZ-Ph-TTR – Conf.1

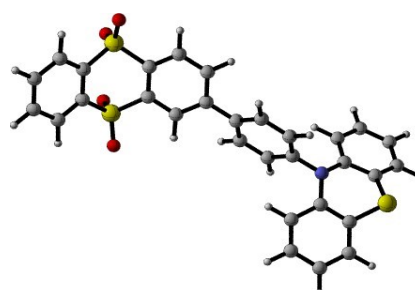

PTZ-Ph-TTR – Conf.2

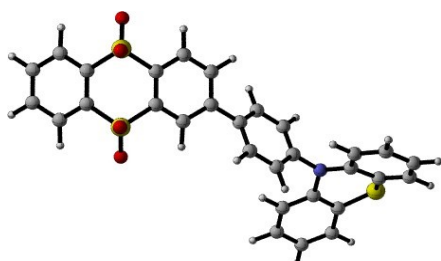

PTZ-Ph-TTR – Conf.3

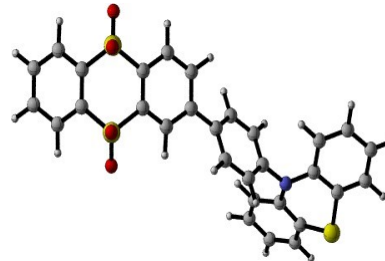

PTZ-Ph-TTR – Conf.4

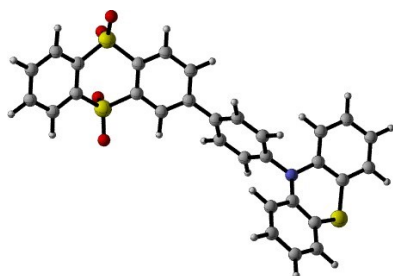

PTZ-Ph-TTR – Conf.5

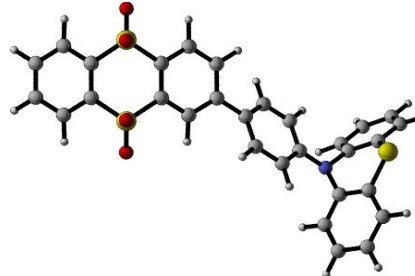

PTZ-Ph-TTR – Conf.6

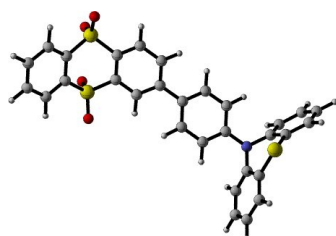

PTZ-Ph-TTR – Conf.7

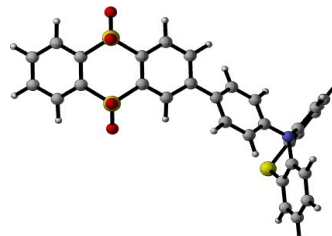

PTZ-Ph-TTR – Conf.8

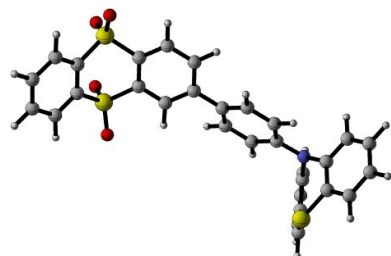

PTZ-Ph-TTR – Conf.9

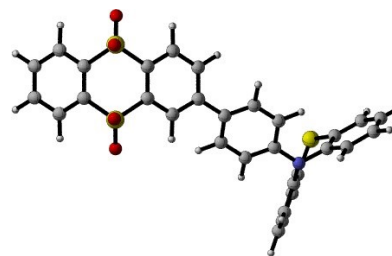

PTZ-Ph-TTR – Conf.10

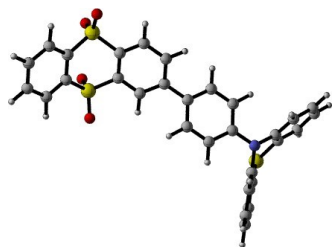

PTZ-Ph-TTR – Conf.11

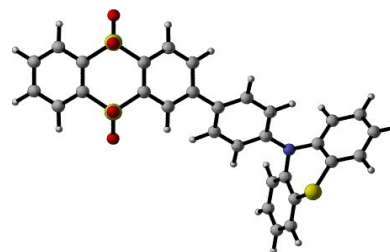

PTZ-Ph-TTR – Conf.12

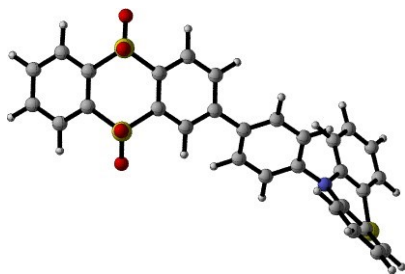

PTZ-Ph-TTR – Conf.13

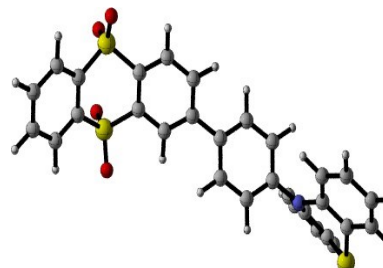

PTZ-Ph-TTR – Conf.14

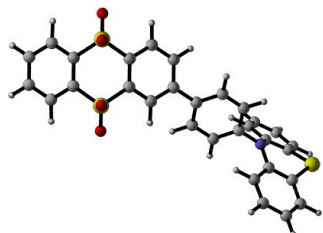

PTZ-Ph-TTR – Conf.15

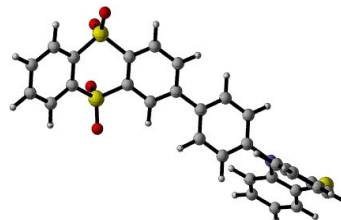

PTZ-Ph-TTR – Conf.16

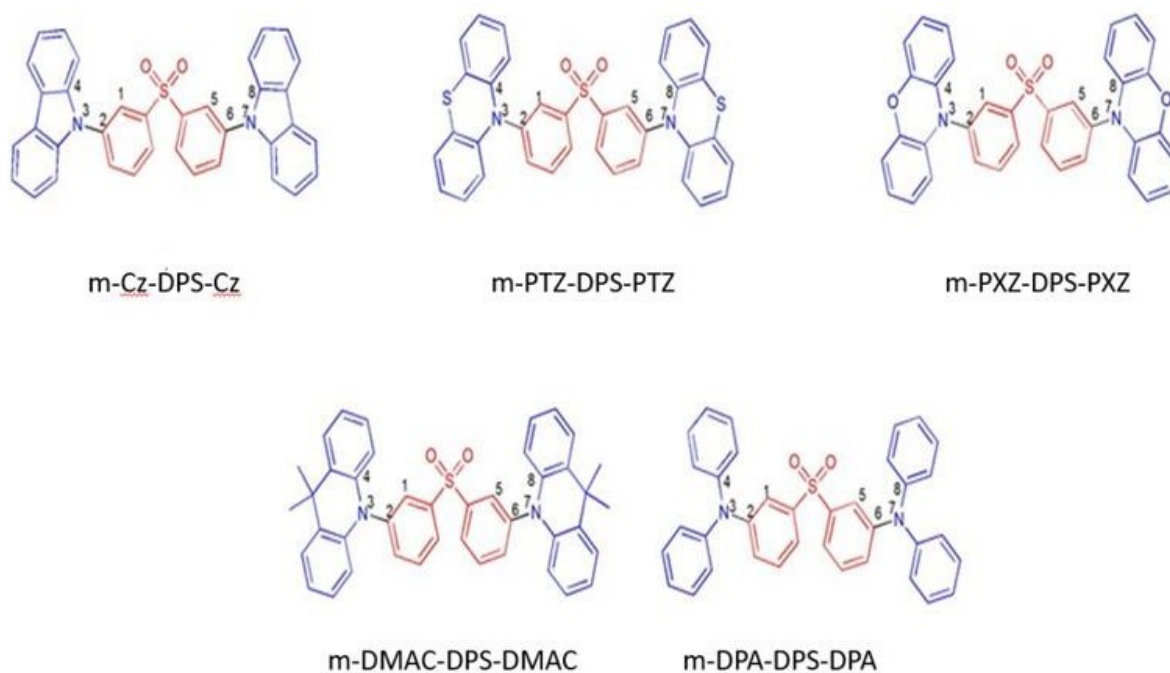

**Figure S1** Torsion angle coding of the Group 1 emitters computed at M06-2X/6-31+G(d,p) level of theory.

**Table S2** Torsion angles of the Group 1 emitters computed at M06-2X/6-31+G(d,p) level of theory.

| Compounds       | $\Theta(\text{D-A})_1$<br>$S_0/S_1/T_1$ | $\Theta(\text{D-A})_2$<br>$S_0/S_1/T_1$ |
|-----------------|-----------------------------------------|-----------------------------------------|
| m-Cz-DPS-Cz     | 52.45/59.74/55.72                       | 53.17/60.72/44.73                       |
| m-PTZ-DPS-PTZ   | -99.76/-88.74/-89.89                    | -75.03/-77.68/-78.82                    |
| m-PXZ-DPS-PXZ   | 73.63/88.17/84.75                       | 73.63/87.71/84.75                       |
| m-DMAC-DPS-DMAC | -92.38/-89.71/-104.21                   | 108.04/106.61/113.13                    |
| m-DPA-DPS-DPA   | -25.20/-41.88/-22.79                    | 41.79/53.01/53.02                       |

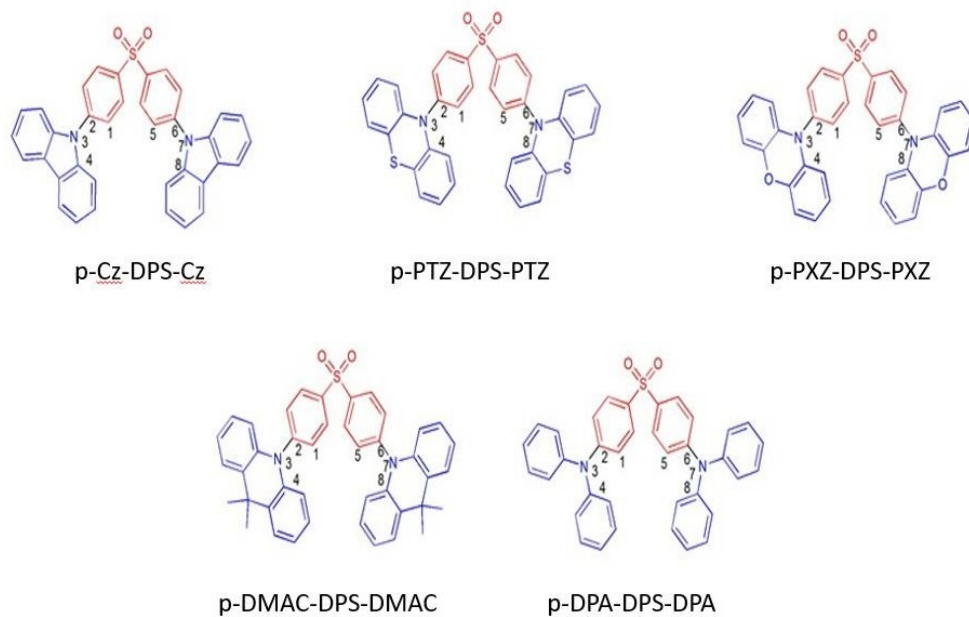

**Figure S2** Torsion angle coding of the Group 2 emitters computed at M06-2X/6-31+G(d,p) level of theory.

**Table S3** Torsion angles of the Group 1 emitters computed at M06-2X/6-31+G(d,p) level of theory.

| Compounds       | $\Theta(\text{D-A})_1$<br>$S_0/S_1/T_1$ | $\Theta(\text{D-A})_2$<br>$S_0/S_1/T_1$ |
|-----------------|-----------------------------------------|-----------------------------------------|
| p-Cz-DPS-Cz     | -51.39/-53.88/-45.78                    | 51.40/63.11/46.54                       |
| p-PTZ-DPS-PTZ   | -74.86/-74.47/-71.45                    | 71.11/88.05/96.55                       |
| p-PXZ-DPS-PXZ   | -104.20/-105.73/-106.21                 | 102.17/89.53/69.12                      |
| p-DMAC-DPS-DMAC | -91.08/-92.03/-105.44                   | 89.23/89.55/72.95                       |
| p-DPA-DPS-DPA   | -30.48/-43.11/-34.82                    | -30.40/-43.18/-32.57                    |



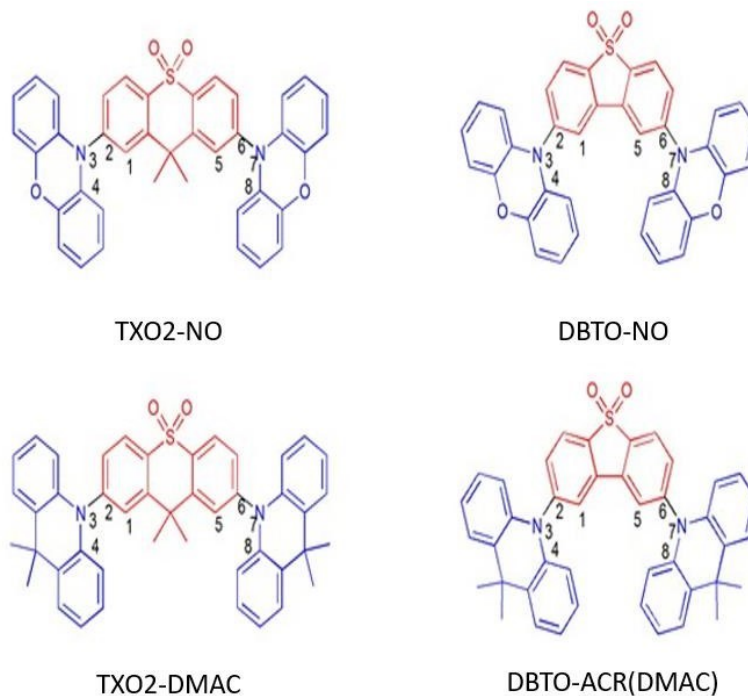

**Figure S3** Torsion angle coding of the emitters with TXO2 and DBTO acceptor moieties computed at M06-2X/6-31+G(d,p) level of theory.

**Table S4** Torsion angles of the emitters with TXO2 and DBTO acceptor moieties computed at M06-2X/6-31+G(d,p) level of theory.

| Compounds      | $\Theta(\text{D-A})_1$<br>$S_0/S_1/T_1$ | $\Theta(\text{D-A})_2$<br>$S_0/S_1/T_1$ |
|----------------|-----------------------------------------|-----------------------------------------|
| TXO2-NO        | 102.26/102.74/105.58                    | -102.27/-90.17/-105.58                  |
| DBTO-NO        | 75.80/89.64/90.06                       | -75.83/-78.61/-90.08                    |
| TXO2-DMAC      | 89.07/90.14/101.81                      | -89.07/-89.30/-101.81                   |
| DBTO-ACR(DMAC) | 90.15/91.23/90.62                       | -90.16/-91.50/-90.63                    |

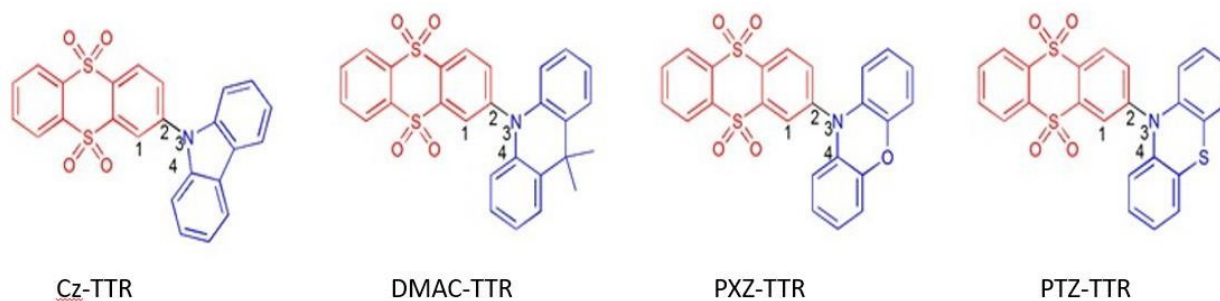

**Figure S4** Torsion angle coding of Group 4 emitters computed at M06-2X/6-31+G(d,p) level of theory.

**Table S5** Torsion angles of Group 4 emitters computed at M06-2X/6-31+G(d,p) level of theory.

| Compounds | $\Theta(\text{D-A})_1$<br>$S_0/S_1/T_1$ |
|-----------|-----------------------------------------|
| Cz-TTR    | 49.02/65.43/45.36                       |
| DMAC-TTR  | -9.57/-90.38/-5.43                      |
| PXZ-TTR   | -83.98/-92.63/-102.05                   |
| PTZ-TTR   | 15.11/-90.76/5.53                       |

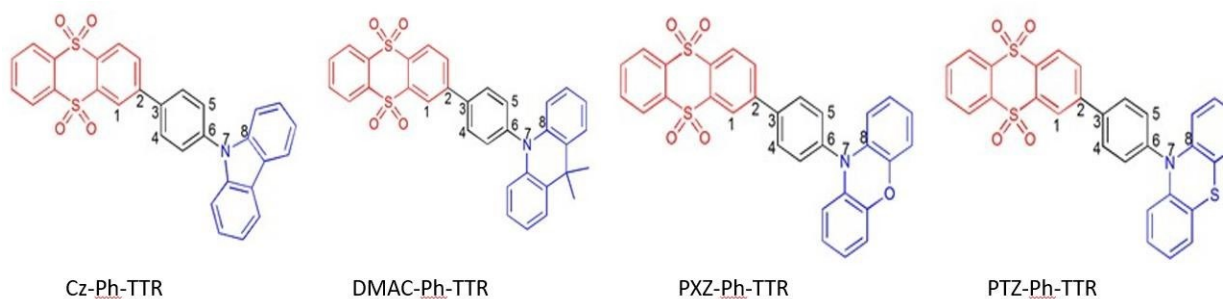

**Figure S5** Torsion angle coding of Group 5 emitters computed at M06-2X/6-31+G(d,p) level of theory.

**Table S6** Torsion angles of Group 5 emitters computed at M06-2X/6-31+G(d,p) level of theory.

| Compounds   | $\Theta(\text{D-A})_1$<br>$S_0/S_1/T_1$ | $\Theta(\text{D-A})_2$<br>$S_0/S_1/T_1$ |
|-------------|-----------------------------------------|-----------------------------------------|
| Cz-Ph-TTR   | 37.70/13.59/-1.93                       | 53.36/46.33/42.18                       |
| DMAC-Ph-TTR | -38.58/-10.41/-8.05                     | 90.40/92.63/62.57                       |
| PXZ-Ph-TTR  | -39.45/-10.79/-12.91                    | 102.92/92.30/72.00                      |
| PTZ-Ph-TTR  | 36.08/20.08/2.63                        | 17.34/-1.56/2.32                        |

**Benchmark study computed at wB97XD/6-31+G(d,p) level of theory.****Table S7** Energies, oscillator strengths and  $\Phi_S$  indices of m-Cz-DPS-Cz emitter calculated at wB97XD/6-31+G(d,p) level of theory.

| Excited State | $E_S$ (eV) | $E_T$ (eV) | $\Phi_{S_S}$ | $\Phi_{S_T}$ | $f_S$  |
|---------------|------------|------------|--------------|--------------|--------|
| 1             | 4.3627     | 3.6082     | 0.6460       | 0.9834       | 0.0224 |
| 2             | 4.4338     | 3.6163     | 0.6629       | 0.9835       | 0.1097 |
| 3             | 4.4759     | 3.7125     | 0.8804       | 0.8030       | 0.0288 |
| 4             | 4.4866     | 3.7221     | 0.8810       | 0.8284       | 0.0853 |
| 5             | 4.6711     | 3.7704     | 0.6947       | 0.9075       | 0.0660 |
| 6             | 4.7338     | 3.8778     | 0.6888       | 0.8942       | 0.2629 |
| 7             | 4.8738     | 4.0334     | 0.9040       | 0.7996       | 0.3816 |
| 8             | 4.9059     | 4.1083     | 0.9172       | 0.7395       | 0.2699 |
| 9             | 5.2148     | 4.2588     | 0.4563       | 0.9271       | 0.0080 |
| 10            | 5.3106     | 4.2662     | 0.7230       | 0.9280       | 0.0162 |

**Table S8** Energies, oscillator strengths and  $\Phi_S$  indices of m-DMAC-DPS-DMAC emitter calculated at wB97XD/6-31+G(d,p) level of theory.

| Excited State | $E_S$ (eV) | $E_T$ (eV) | $\Phi_{S_S}$ | $\Phi_{S_T}$ | $f_S$  |
|---------------|------------|------------|--------------|--------------|--------|
| 1             | 3.9098     | 3.6210     | 0.4506       | 0.8858       | 0.0002 |
| 2             | 4.1019     | 3.7921     | 0.4139       | 0.8983       | 0.0185 |
| 3             | 4.2113     | 3.8110     | 0.4077       | 0.6652       | 0.0010 |
| 4             | 4.4175     | 3.8997     | 0.4104       | 0.7644       | 0.0127 |
| 5             | 4.6311     | 3.9271     | 0.8393       | 0.9031       | 0.0749 |
| 6             | 4.6943     | 3.9900     | 0.8043       | 0.8315       | 0.3425 |
| 7             | 4.7857     | 4.0396     | 0.8435       | 0.8816       | 0.0590 |
| 8             | 4.9269     | 4.0900     | 0.8011       | 0.9314       | 0.3516 |
| 9             | 4.9807     | 4.1146     | 0.8781       | 0.9144       | 0.2476 |
| 10            | 5.0804     | 4.1445     | 0.8875       | 0.9396       | 0.0116 |

**Table S9** Energies, oscillator strengths and  $\Phi_S$  indices of m-DPA-DPS-DPA emitter calculated at wB97XD/6-31+G(d,p) level of theory.

| Excited State | $E_S$ (eV) | $E_T$ (eV) | $\Phi_{S_S}$ | $\Phi_{S_T}$ | $f_S$  |
|---------------|------------|------------|--------------|--------------|--------|
| 1             | 4.0298     | 3.3051     | 0.7577       | 0.8661       | 0.0178 |
| 2             | 4.0815     | 3.4841     | 0.7123       | 0.8528       | 0.0756 |
| 3             | 4.3273     | 3.5681     | 0.7576       | 0.8586       | 0.1113 |
| 4             | 4.4110     | 3.5743     | 0.7757       | 0.8294       | 0.5466 |
| 5             | 4.5339     | 3.6727     | 0.7460       | 0.8694       | 0.4100 |
| 6             | 4.5966     | 3.7085     | 0.7079       | 0.9015       | 0.2558 |
| 7             | 4.7982     | 4.1291     | 0.8324       | 0.9736       | 0.1407 |
| 8             | 4.8383     | 4.1510     | 0.8516       | 0.9391       | 0.0989 |
| 9             | 5.0660     | 4.1793     | 0.8753       | 0.9050       | 0.0445 |
| 10            | 5.0505     | 4.2150     | 0.8768       | 0.8123       | 0.0306 |

**Table S10** Energies, oscillator strengths and  $\Phi_S$  indices of m-PTZ-DPS-PTZ emitter calculated at wB97XD/6-31+G(d,p) level of theory.

| Excited State | $E_S$ (eV) | $E_T$ (eV) | $\Phi_{S_S}$ | $\Phi_{S_T}$ | $f_S$  |
|---------------|------------|------------|--------------|--------------|--------|
| 1             | 3.9630     | 3.4100     | 0.6198       | 0.8614       | 0.0005 |
| 2             | 4.0578     | 3.4452     | 0.7089       | 0.8675       | 0.0001 |
| 3             | 4.2121     | 3.8223     | 0.6894       | 0.8505       | 0.0053 |
| 4             | 4.2499     | 3.8343     | 0.5182       | 0.8681       | 0.0028 |
| 5             | 4.4369     | 3.9408     | 0.5915       | 0.7563       | 0.0163 |
| 6             | 4.4885     | 3.9573     | 0.3901       | 0.9463       | 0.0037 |
| 7             | 4.5790     | 4.0014     | 0.8237       | 0.7664       | 0.0512 |
| 8             | 4.5964     | 4.0335     | 0.8192       | 0.9112       | 0.0541 |
| 9             | 4.7584     | 4.0615     | 0.8485       | 0.8625       | 0.1068 |
| 10            | 4.8468     | 4.1536     | 0.8053       | 0.9841       | 0.0931 |

**Table S11** Energies, oscillator strengths and  $\Phi_S$  indices of m-PXZ-DPS-PXZ emitter calculated at wB97XD/6-31+G(d,p) level of theory.

| Excited State | $E_S$ (eV) | $E_T$ (eV) | $\Phi_{S_S}$ | $\Phi_{S_T}$ | $f_S$  |
|---------------|------------|------------|--------------|--------------|--------|
| 1             | 3.9245     | 3.4327     | 0.4742       | 0.8763       | 0.0002 |
| 2             | 3.9370     | 3.4332     | 0.4452       | 0.8772       | 0.0012 |
| 3             | 4.1812     | 3.7958     | 0.4402       | 0.6622       | 0.0085 |
| 4             | 4.1852     | 3.7998     | 0.4382       | 0.6635       | 0.0049 |
| 5             | 4.3860     | 3.8989     | 0.7782       | 0.7940       | 0.0862 |
| 6             | 4.3879     | 3.9002     | 0.7739       | 0.7877       | 0.1085 |
| 7             | 4.7204     | 3.9788     | 0.8780       | 0.9636       | 0.0051 |
| 8             | 4.7221     | 4.0704     | 0.8806       | 0.5375       | 0.0007 |
| 9             | 4.7790     | 4.0707     | 0.8192       | 0.5580       | 0.1697 |
| 10            | 4.7839     | 4.0905     | 0.8262       | 0.9763       | 0.1628 |

**Table S12** Energies, oscillator strengths and  $\Phi_S$  indices of p-Cz-DPS-Cz emitter calculated at wB97XD/6-31+G(d,p) level of theory.

| Excited State | $E_S$ (eV) | $E_T$ (eV) | $\Phi_{S_S}$ | $\Phi_{S_T}$ | $f_S$  |
|---------------|------------|------------|--------------|--------------|--------|
| 1             | 4.2332     | 3.5922     | 0.7480       | 0.9051       | 0.7430 |
| 2             | 4.4194     | 3.6108     | 0.7340       | 0.9852       | 0.2762 |
| 3             | 4.4898     | 3.6108     | 0.8750       | 0.9852       | 0.0284 |
| 4             | 4.4983     | 3.7191     | 0.8638       | 0.8434       | 0.0006 |
| 5             | 4.8393     | 3.7300     | 0.8448       | 0.7813       | 0.0153 |
| 6             | 4.8931     | 3.7631     | 0.9017       | 0.8711       | 0.3222 |
| 7             | 4.8977     | 4.2624     | 0.9136       | 0.9208       | 0.1488 |
| 8             | 4.9207     | 4.2632     | 0.8850       | 0.9193       | 0.1310 |
| 9             | 5.1617     | 4.3819     | 0.7213       | 0.9617       | 0.0000 |
| 10            | 5.1626     | 4.4178     | 0.7128       | 0.9740       | 0.0002 |

**Table S13** Energies, oscillator strengths and  $\Phi_S$  indices of p-DMAC-DPS-DMAC emitter calculated at wB97XD/6-31+G(d,p) level of theory.

| Excited State | $E_S$ (eV) | $E_T$ (eV) | $\Phi_{S_S}$ | $\Phi_{S_T}$ | $f_S$  |
|---------------|------------|------------|--------------|--------------|--------|
| 1             | 3.8130     | 3.6288     | 0.1609       | 0.9121       | 0.0001 |
| 2             | 3.8138     | 3.6288     | 0.1622       | 0.9114       | 0.0003 |
| 3             | 4.3926     | 3.7955     | 0.7222       | 0.2746       | 0.0021 |
| 4             | 4.3934     | 3.7961     | 0.7071       | 0.2105       | 0.0046 |
| 5             | 4.6324     | 3.8914     | 0.8867       | 0.7474       | 0.1070 |

|    |        |        |        |        |        |
|----|--------|--------|--------|--------|--------|
| 6  | 4.6359 | 3.8915 | 0.8884 | 0.7442 | 0.0461 |
| 7  | 4.7113 | 3.9296 | 0.8161 | 0.9584 | 0.3338 |
| 8  | 4.7241 | 4.0221 | 0.8237 | 0.8014 | 0.5045 |
| 9  | 5.0615 | 4.0221 | 0.8743 | 0.7986 | 0.0821 |
| 10 | 5.0667 | 4.1349 | 0.8861 | 0.9826 | 0.1226 |

**Table S14** Energies, oscillator strengths and  $\Phi_S$  indices of p-DPA-DPS-DPA emitter calculated at wB97XD/6-31+G(d,p) level of theory.

| Excited State | $E_S$ (eV) | $E_T$ (eV) | $\Phi_{S_S}$ | $\Phi_{S_T}$ | $f_S$  |
|---------------|------------|------------|--------------|--------------|--------|
| 1             | 3.9767     | 3.2358     | 0.7701       | 0.8662       | 1.0057 |
| 2             | 4.3075     | 3.3860     | 0.7701       | 0.8726       | 0.3267 |
| 3             | 4.3256     | 3.6765     | 0.7764       | 0.9092       | 0.1083 |
| 4             | 4.3668     | 3.6793     | 0.7724       | 0.9110       | 0.0316 |
| 5             | 4.6096     | 3.8699     | 0.7181       | 0.7658       | 0.0627 |
| 6             | 4.6115     | 3.9140     | 0.7162       | 0.7504       | 0.5257 |
| 7             | 4.9253     | 4.1150     | 0.8905       | 0.9774       | 0.0347 |
| 8             | 4.9902     | 4.1689     | 0.8927       | 0.9820       | 0.0719 |
| 9             | 5.0624     | 4.3168     | 0.8850       | 0.8011       | 0.0301 |
| 10            | 5.0657     | 4.3633     | 0.8835       | 0.8069       | 0.0200 |

**Table S15** Energies, oscillator strengths and  $\Phi_S$  indices of p-PTZ-DPS-PTZ emitter calculated at wB97XD/6-31+G(d,p) level of theory.

| Excited State | $E_S$ (eV) | $E_T$ (eV) | $\Phi_{S_S}$ | $\Phi_{S_T}$ | $f_S$  |
|---------------|------------|------------|--------------|--------------|--------|
| 1             | 3.9572     | 3.4117     | 0.5271       | 0.8505       | 0.0012 |
| 2             | 3.9587     | 3.4150     | 0.5340       | 0.8528       | 0.0009 |
| 3             | 4.1178     | 3.8243     | 0.6665       | 0.8475       | 0.0007 |
| 4             | 4.1244     | 3.8259     | 0.6758       | 0.8543       | 0.0021 |
| 5             | 4.5684     | 3.9027     | 0.7357       | 0.8543       | 0.0717 |
| 6             | 4.5756     | 3.9399     | 0.7462       | 0.5983       | 0.0529 |
| 7             | 4.5771     | 3.9630     | 0.8043       | 0.8711       | 0.0568 |
| 8             | 4.5798     | 4.0415     | 0.7996       | 0.9067       | 0.0458 |
| 9             | 4.9267     | 4.0489     | 0.6692       | 0.8917       | 0.0513 |
| 10            | 4.9311     | 4.1034     | 0.6768       | 0.8183       | 0.0567 |

**Table S16** Energies, oscillator strengths and  $\Phi_S$  indices of p-PXZ-DPS-PXZ emitter calculated at wB97XD/6-31+G(d,p) level of theory.

| Excited State | $E_S$ (eV) | $E_T$ (eV) | $\Phi_{S_S}$ | $\Phi_{S_T}$ | $f_S$  |
|---------------|------------|------------|--------------|--------------|--------|
| 1             | 3.7805     | 3.4164     | 0.2478       | 0.8701       | 0.0022 |
| 2             | 3.7817     | 3.4201     | 0.2422       | 0.8729       | 0.0013 |
| 3             | 4.2340     | 3.7449     | 0.7163       | 0.4022       | 0.0033 |
| 4             | 4.2379     | 3.7458     | 0.7382       | 0.3776       | 0.0037 |
| 5             | 4.4499     | 3.8779     | 0.7640       | 0.7749       | 0.1476 |
| 6             | 4.4566     | 3.8836     | 0.7609       | 0.7806       | 0.2006 |
| 7             | 4.7071     | 3.9183     | 0.8906       | 0.7385       | 0.0097 |
| 8             | 4.7138     | 3.9200     | 0.8942       | 0.7088       | 0.0030 |
| 9             | 4.8806     | 3.9416     | 0.8344       | 0.9580       | 0.0879 |
| 10            | 4.8852     | 4.0935     | 0.8303       | 0.9776       | 0.1033 |

**Table S17** Energies, oscillator strengths and  $\Phi_S$  indices of DBTO-ACR emitter calculated at wB97XD/6-31+G(d,p) level of theory.

| Excited State | $E_S$ (eV) | $E_T$ (eV) | $\Phi_{S_S}$ | $\Phi_{S_T}$ | $f_S$  |
|---------------|------------|------------|--------------|--------------|--------|
| 1             | 3.7114     | 3.3601     | 0.1750       | 0.9588       | 0.0000 |
| 2             | 3.7237     | 3.6206     | 0.1750       | 0.8121       | 0.0000 |
| 3             | 4.0165     | 3.6230     | 0.3573       | 0.8312       | 0.0002 |
| 4             | 4.0255     | 3.6999     | 0.3747       | 0.3703       | 0.0000 |
| 5             | 4.5754     | 3.7102     | 0.8276       | 0.3411       | 0.1747 |
| 6             | 4.6414     | 3.9000     | 0.8676       | 0.7425       | 0.0341 |
| 7             | 4.6428     | 3.9000     | 0.8706       | 0.7471       | 0.0724 |
| 8             | 4.7016     | 3.9029     | 0.7726       | 0.5044       | 0.0000 |
| 9             | 4.7114     | 3.9083     | 0.7787       | 0.5135       | 0.6906 |
| 10            | 4.8755     | 4.1532     | 0.9162       | 0.9761       | 0.1735 |

**Table S18** Energies, oscillator strengths and  $\Phi_S$  indices of DBTO-NO emitter calculated at wB97XD/6-31+G(d,p) level of theory.

| Excited State | $E_S$ (eV) | $E_T$ (eV) | $\Phi_{S_S}$ | $\Phi_{S_T}$ | $f_S$  |
|---------------|------------|------------|--------------|--------------|--------|
| 1             | 3.7010     | 3.3995     | 0.2073       | 0.9617       | 0.0004 |
| 2             | 3.7155     | 3.4168     | 0.2125       | 0.8375       | 0.0000 |
| 3             | 3.9273     | 3.4181     | 0.3502       | 0.8425       | 0.0068 |
| 4             | 3.9377     | 3.7016     | 0.3677       | 0.2339       | 0.0000 |
| 5             | 4.3783     | 3.7145     | 0.7573       | 0.2220       | 0.0001 |
| 6             | 4.3803     | 3.7850     | 0.7583       | 0.6328       | 0.1803 |
| 7             | 4.6001     | 3.7915     | 0.8147       | 0.6512       | 0.1144 |
| 8             | 4.7106     | 3.8923     | 0.8781       | 0.7926       | 0.0153 |
| 9             | 4.7175     | 3.8923     | 0.7491       | 0.7918       | 0.0056 |
| 10            | 4.7572     | 4.0907     | 0.8128       | 0.9787       | 0.0000 |

**Table S19** Energies, oscillator strengths and  $\Phi_S$  indices of DMAC-TTR emitter calculated at wB97XD/6-31+G(d,p) level of theory.

| Excited State | $E_S$ (eV) | $E_T$ (eV) | $\Phi_{S_S}$ | $\Phi_{S_T}$ | $f_S$  |
|---------------|------------|------------|--------------|--------------|--------|
| 1             | 3.9299     | 3.6269     | 0.3953       | 0.9187       | 0.0002 |
| 2             | 3.9365     | 3.6270     | 0.3638       | 0.9193       | 0.0001 |
| 3             | 4.4199     | 3.8855     | 0.7062       | 0.7752       | 0.0015 |
| 4             | 4.4223     | 3.8857     | 0.7041       | 0.7744       | 0.0098 |
| 5             | 4.6277     | 3.9146     | 0.8902       | 0.4754       | 0.0841 |
| 6             | 4.6296     | 3.9200     | 0.8909       | 0.4388       | 0.0493 |
| 7             | 4.7126     | 3.9783     | 0.8164       | 0.9664       | 0.0899 |
| 8             | 4.7222     | 4.0228     | 0.8215       | 0.7588       | 0.7607 |
| 9             | 5.0796     | 4.0231     | 0.8474       | 0.7626       | 0.0198 |
| 10            | 5.0843     | 4.0477     | 0.8522       | 0.9757       | 0.1699 |

**Table S20** Energies, oscillator strengths and  $\Phi_S$  indices of PXZ-TTR emitter calculated at wB97XD/6-31+G(d,p) level of theory.

| Excited State | $E_S$ (eV) | $E_T$ (eV) | $\Phi_{S_S}$ | $\Phi_{S_T}$ | $f_S$  |
|---------------|------------|------------|--------------|--------------|--------|
| 1             | 3.8931     | 3.4182     | 0.3085       | 0.8726       | 0.0001 |
| 2             | 3.8976     | 3.4183     | 0.3029       | 0.873        | 0.0040 |
| 3             | 4.2471     | 3.8263     | 0.7364       | 0.5708       | 0.0012 |
| 4             | 4.2478     | 3.8282     | 0.7327       | 0.5838       | 0.0127 |
| 5             | 4.4638     | 3.8836     | 0.7065       | 0.7940       | 0.0369 |
| 6             | 4.4678     | 3.8837     | 0.7096       | 0.7946       | 0.3221 |
| 7             | 4.7058     | 3.9443     | 0.8868       | 0.6851       | 0.0121 |
| 8             | 4.7098     | 3.9463     | 0.8863       | 0.6463       | 0.0015 |
| 9             | 4.9048     | 3.9866     | 0.7120       | 0.9644       | 0.0194 |
| 10            | 4.9082     | 4.0546     | 0.7139       | 0.9751       | 0.1484 |

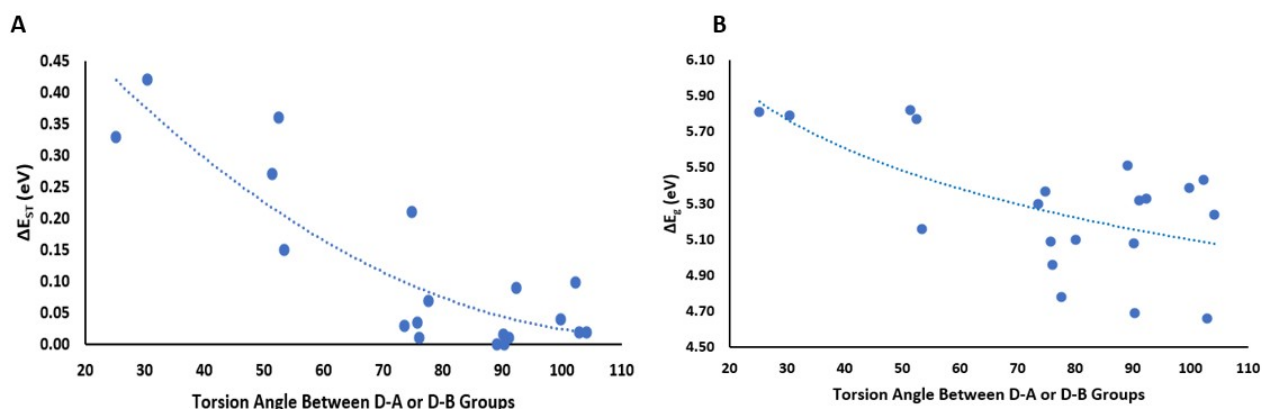

**Figure S6** A) Relation between the torsion angle and  $\Delta E_{ST}$ , B) Relation between the torsion angle and  $E_g$ .

Figure S6 represents the Torsion Angle -  $\Delta E_{ST}$  (A) and Torsion Angle -  $E_g$  (B) correlations for the molecules under investigation. As represented in A), smallest  $\Delta E_{ST}$  values were obtained around the  $90^\circ$ , which represents the favorable effect of orthogonality. Therefore, angles between  $75^\circ$ - $105^\circ$  represent the acceptable geometry for the energy gap. On the other hand, correlation between  $E_g$  and geometry did not represent a regular trend. While the orthogonal geometries led to small  $E_g$  values for some molecules, some of them yield large energy differences in favorable geometries. This behavior can be attributed to the large variety of emitters under investigation, where, in some cases, molecules with totally different acceptor moieties may yield same degree of orthogonality, but the difference in acceptor groups may be the reason of different  $E_g$  values

**Table S21** Oscillator strengths for singlet excitations of Group 1 and Group 2 emitters computed at M06-2X/6-31+G(d,p) level of theory.

|                         | S0→S1  | S0→S2  | S0→S3  | S0→S4  | S0→S5  | S0→S6  | S0→S7  | S0→S8  | S0→S9  | S0→S10 |
|-------------------------|--------|--------|--------|--------|--------|--------|--------|--------|--------|--------|
| <i>m</i> -Cz-DPS-Cz     | 0.0185 | 0.0587 | 0.0191 | 0.1179 | 0.0371 | 0.3055 | 0.0052 | 0.3728 | 0.2308 | 0.0377 |
| <i>p</i> -Cz-DPS-Cz     | 0.6433 | 0.2086 | 0.0743 | 0.0467 | 0.0025 | 0.0113 | 0.0318 | 0.0788 | 0.1359 | 0.3846 |
| <i>m</i> -PTZ-DPS-PTZ   | 0.0006 | 0.0007 | 0.0002 | 0.0022 | 0.0025 | 0.0066 | 0.0526 | 0.0547 | 0.1105 | 0.1072 |
| <i>p</i> -PTZ-DPS-PTZ   | 0.0007 | 0.0023 | 0.0002 | 0.0005 | 0.0248 | 0.0380 | 0.0481 | 0.0555 | 0.0856 | 0.0993 |
| <i>m</i> -DMAC-DPS-DMAC | 0.0002 | 0.0154 | 0.0005 | 0.0124 | 0.0986 | 0.2999 | 0.0592 | 0.1863 | 0.4185 | 0.0124 |
| <i>p</i> -DMAC-DPS-DMAC | 0.0001 | 0.0003 | 0.0011 | 0.0014 | 0.1023 | 0.0484 | 0.3343 | 0.4996 | 0.0016 | 0.0101 |
| <i>m</i> -PXZ-DPS-PXZ   | 0.0000 | 0.0007 | 0.0061 | 0.0031 | 0.0748 | 0.0965 | 0.0048 | 0.0000 | 0.1892 | 0.1712 |
| <i>p</i> -PXZ-DPS-PXZ   | 0.0014 | 0.0008 | 0.0000 | 0.0000 | 0.1242 | 0.1707 | 0.0086 | 0.0028 | 0.1300 | 0.1478 |
| <i>m</i> -DPA-DPS-DPA   | 0.0052 | 0.0744 | 0.1228 | 0.5341 | 0.4195 | 0.2402 | 0.1032 | 0.0799 | 0.0343 | 0.0378 |
| <i>p</i> -DPA-DPS-DPA   | 0.9967 | 0.1901 | 0.2356 | 0.0299 | 0.5097 | 0.0551 | 0.0391 | 0.0832 | 0.0261 | 0.0192 |



**Table S22** Experimental and calculated energy gaps and, and root mean square coupling element ( $|\langle S_1 | H^{SOC} | T_n \rangle|$ ) for  $T_n \rightarrow S_1$  transition.

| Compound                   | $\Delta E_{ST}$ (M/P) <sup>a</sup><br>(eV) | $\Delta E_{S_1-T_n}$ (M/P) <sup>b</sup><br>(eV) | $ \langle S_1   H^{SOC}   T_n \rangle $ (cm-1)<br>M/P | $ V_{SOC} ^2$ (cm-2)<br>M/P |
|----------------------------|--------------------------------------------|-------------------------------------------------|-------------------------------------------------------|-----------------------------|
| <b>Cz-DPS-Cz (m/p)</b>     | 0.440/0.28±0.03                            | $S_1-T_1 = \mathbf{0.365}/0.4100$               | <b>0.640</b> /0.330                                   | <b>0.123</b> /0.064         |
|                            |                                            | $S_1-T_2 = 0.350/\mathbf{0.2735}$               | 0.080/ <b>0.330</b>                                   | 0.006/ <b>0.109</b>         |
|                            |                                            | $S_1-T_3 = 0.326/\mathbf{0.2365}$               | 0.040/0.190                                           | 0.002/0.036                 |
|                            |                                            | $S_1-T_4 = 0.313/\mathbf{0.2335}$               | <b>0.490</b> /0.240                                   | 0.240/0.058                 |
|                            |                                            | $S_1-T_5 = 0.308/0.1985$                        | <b>0.420</b> /0.140                                   | 0.176/0.020                 |
|                            |                                            | $S_1-T_6 = 0.245/0.1985$                        | 0.300/0.230                                           | 0.090/0.053                 |
|                            |                                            | $S_1-T_7 = 0.093$ (M)                           | 0.530                                                 | 0.281                       |
|                            |                                            | $S_1-T_8 = 0.039$ (M)                           | 0.330                                                 | 0.109                       |
| <b>PTZ-DPS-PTZ (m/p)</b>   | 0.010/0.410                                | $S_1-T_1 = 0.269/\mathbf{0.205}$                | 0.410/ <b>1.470</b>                                   | 0.079/ <b>0.280</b>         |
|                            |                                            | $S_1-T_2 = 0.219/0.203$                         | 0.260/0.260                                           | 0.068/0.068                 |
|                            |                                            | $S_1-T_3 = \mathbf{0.040}/0.013$                | <b>0.530</b> /0.500                                   | <b>0.281</b> /0.250         |
|                            |                                            | $S_1-T_4 = -/0.0149$                            | -/0.110                                               | -/0.012                     |
| <b>DMAC-DPS-DMAC (m/p)</b> | 0.050/0.090                                | $S_1-T_1 = \mathbf{0.089}/0.006$                | <b>0.540</b> /0.720                                   | <b>0.104</b> /0.139         |
|                            |                                            | $S_1-T_2 = \mathbf{0.093}/0.005$                | <b>0.420</b> /0.680                                   | <b>0.176</b> /0.462         |
|                            |                                            | $S_1-T_3 = 0.108/0.213$                         | 0.340/0.550                                           | 0.116/0.303                 |
| <b>PXZ-DPS-PXZ (m/p)</b>   | 0.060/0.080                                | $S_1-T_1 = 0.170/0.022$                         | 0.270/0.640                                           | 0.052/0.123                 |
|                            |                                            | $S_1-T_2 = 0.170/0.019$                         | <b>0.510</b> / <b>1.610</b>                           | <b>0.260</b> / <b>2.592</b> |
|                            |                                            | $S_1-T_3 = 0.030/\mathbf{0.034}$                | 0.200/0.040                                           | 0.040/0.002                 |
|                            |                                            | $S_1-T_4 = \mathbf{0.030}/\mathbf{0.035}$       | <b>0.260</b> /0.920                                   | <b>0.068</b> /0.846         |
| <b>DPA-DPS-DPA (m/p)</b>   | -/0.540                                    | $S_1-T_1 = 0.573/0.587$                         | 0.260/0.150                                           | 0.050/0.030                 |
|                            |                                            | $S_1-T_2 = 0.396/0.425$                         | 0.580/1.530                                           | 0.336/2.341                 |
|                            |                                            | $S_1-T_3 = 0.331/0.100$                         | 0.860/1.040                                           | 0.740/1.082                 |
|                            |                                            | $S_1-T_4 = 0.306/0.079$                         | 0.200/0.190                                           | 0.040/0.036                 |
|                            |                                            | $S_1-T_5 = 0.186/0.013$                         | 0.350/0.110                                           | 0.123/0.012                 |
|                            |                                            | $S_1-T_6 = 0.098/0.046$                         | 0.390/0.600                                           | 0.152/0.360                 |

**Table S23.** Natures of  $S_1$ ,  $T_1$ - $T_5$  states of the emitters in Group 1 and Group 2 computed at M062X/6-31+G(d,p) level of theory in toluene.

| Emitters                | $S_1$<br>( $\Phi_s$ ) | $T_1$<br>( $\Phi_s$ ) | $T_2$<br>( $\Phi_s$ ) | $T_3$<br>( $\Phi_s$ ) | $T_4$<br>( $\Phi_s$ ) | $T_5$<br>( $\Phi_s$ ) |
|-------------------------|-----------------------|-----------------------|-----------------------|-----------------------|-----------------------|-----------------------|
| <i>m</i> -Cz-DPS-Cz     | CT<br>0.5570          | LE<br>0.7721          | LE<br>0.8095          | LE<br>0.8065          | LE<br>0.9629          | LE<br>0.9618          |
| <i>p</i> -Cz-DPS-Cz     | CT-LE<br>0.7047       | CT-LE<br>0.8405       | CT-LE<br>0.8622       | LE<br>0.7503          | LE<br>0.7622          | LE<br>0.9676          |
| <i>m</i> -PTZ-DPS-PTZ   | CT-LE<br>0.4703       | CT-LE<br>0.7920       | LE<br>0.8164          | CT-LE<br>0.5513       | CT<br>0.5599          | LE<br>0.7030          |
| <i>p</i> -PTZ-DPS-PTZ   | CT<br>0.3310          | CT-LE<br>0.7845       | CT-LE<br>0.7859       | CT<br>0.4534          | CT<br>0.4614          | LE<br>0.6823          |
| <i>m</i> -DMAC-DPS-DMAC | CT<br>0.3939          | CT-LE<br>0.6062       | CT-LE<br>0.5834       | LE<br>0.8424          | LE<br>0.7313          | CT-LE<br>0.5798       |
| <i>p</i> -DMAC-DPS-DMAC | CT<br>0.1642          | CT<br>0.1692          | CT<br>0.1677          | LE<br>0.8800          | LE<br>0.8798          | LE<br>0.7097          |
| <i>m</i> -PXZ-DPS-PXZ   | CT<br>0.4383          | CT-LE<br>0.7597       | CT-LE<br>0.7578       | CT-LE<br>0.6758       | CT-LE<br>0.6576       | CT-LE<br>0.5843       |
| <i>p</i> -PXZ-DPS-PXZ   | CT<br>0.2485          | CT-LE<br>0.4301       | CT<br>0.3921          | CT-LE<br>0.7840       | CT-LE<br>0.7951       | LE<br>0.7599          |
| <i>m</i> -DPA-DPS-DPA   | CT-LE<br>0.7416       | CT-LE<br>0.8193       | CT-LE<br>0.7288       | CT-LE<br>0.7987       | LE<br>0.8031          | LE<br>0.8448          |
| <i>p</i> -DPA-DPS-DPA   | CT-LE<br>0.7594       | CT-LE<br>0.8375       | CT-LE<br>0.8465       | LE<br>0.8208          | LE<br>0.8373          | LE<br>0.8241          |

**Table S24.** Natures of  $S_1$ ,  $T_1$ - $T_5$  states computed at M062X/6-31+G(d,p) level of theory in toluene (TXO2-PXZ, *p*-PXZ-DPS-PXZ, TXO2-DMAC, *p*-DMAC-DPS-DMAC, DBTO-DMAC) and in dichloromethane (DBTO-PXZ).

| Emitters                | $S_1$<br>( $\Phi_s$ ) | $T_1$<br>( $\Phi_s$ ) | $T_2$<br>( $\Phi_s$ ) | $T_3$<br>( $\Phi_s$ ) | $T_4$<br>( $\Phi_s$ ) | $T_5$<br>( $\Phi_s$ ) |
|-------------------------|-----------------------|-----------------------|-----------------------|-----------------------|-----------------------|-----------------------|
| TXO2-PXZ                | CT<br>(0.2809)        | LE<br>(0.8393)        | LE<br>(0.8372)        | CT<br>(0.3879)        | CT<br>(0.3939)        | LE<br>(0.8082)        |
| <i>p</i> -PXZ-DPS-PXZ   | CT<br>(0.2485)        | CT-LE<br>(0.4301)     | CT-LE<br>(0.3921)     | CT-LE<br>(0.7840)     | CT-LE<br>(0.7951)     | CT-LE<br>(0.7599)     |
| DBTO-PXZ                | CT<br>(0.1854)        | CT<br>(0.3842)        | CT<br>(0.4018)        | CT-LE<br>(0.6394)     | CT-LE<br>(0.6383)     | LE<br>(0.9497)        |
| TXO2-DMAC               | CT<br>(0.3465)        | CT<br>(0.3422)        | CT<br>(0.3206)        | LE<br>(0.8951)        | LE<br>(0.8951)        | LE<br>(0.7484)        |
| <i>p</i> -DMAC-DPS-DMAC | CT<br>(0.1642)        | CT<br>(0.1692)        | CT<br>(0.1677)        | LE<br>(0.8800)        | LE<br>(0.8798)        | LE<br>(0.7097)        |
| DBTO-DMAC               | CT<br>(0.1712)        | CT<br>(0.2102)        | CT<br>(0.2044)        | LE<br>(0.9530)        | CT-LE<br>(0.4715)     | CT-LE<br>(0.4789)     |

**Table S25.** Natures of  $S_1$ ,  $T_1$ - $T_5$  states computed at M062X/6-31+G(d,p) level of theory in toluene (for Cz-Ph-TTR, DMAC-TTR, DMAC-Ph-TTR, PXZ-TTR, PXZ-Ph-TTR, PTZ-TTR, PTZ-Ph-TTR) and in ethyl ethanoate (Cz-TTR).

| Emitters                 | $S_1$<br>( $\Phi_s$ ) | $T_1$<br>( $\Phi_s$ ) | $T_2$<br>( $\Phi_s$ ) | $T_3$<br>( $\Phi_s$ ) | $T_4$<br>( $\Phi_s$ ) | $T_5$<br>( $\Phi_s$ ) |
|--------------------------|-----------------------|-----------------------|-----------------------|-----------------------|-----------------------|-----------------------|
| Cz-TTR                   | CT-LE<br>(0.5372)     | LE<br>(0.6815)        | LE<br>(0.9669)        | LE<br>(0.7556)        | LE<br>(0.6962)        | LE<br>(0.9489)        |
| Cz-Ph-TTR                | CT-LE<br>(0.7649)     | LE<br>(0.9017)        | LE<br>(0.7723)        | LE<br>(0.9601)        | LE<br>(0.9118)        | LE<br>(0.9495)        |
| DMAC-TTR<br>(Planar)     | CT-LE<br>(0.7150)     | LE<br>(0.7941)        | LE<br>(0.7471)        | LE<br>(0.9543)        | LE<br>(0.9551)        | LE<br>(0.9622)        |
| DMAC-TTR<br>(Orthogonal) | CT<br>0.2008          | CT<br>0.2255          | CT<br>0.4256          | LE<br>0.8829          | LE<br>0.9490          | LE<br>0.7289          |
| DMAC-Ph-TTR              | CT                    | CT                    | LE                    | LE                    | LE                    | LE                    |

|                                   |                   |                   |                   |                   |                   |                   |
|-----------------------------------|-------------------|-------------------|-------------------|-------------------|-------------------|-------------------|
| (only orthogonal)                 | (0.4644)          | (0.4545)          | (0.9450)          | (0.8793)          | (0.7088)          | (0.7127)          |
| <b>PXZ-TTR</b>                    | CT-LE<br>(0.5143) | CT-LE<br>(0.5045) | CT<br>(0.4417)    | LE<br>(0.7709)    | CT-LE<br>(0.5976) | CT-LE<br>(0.5589) |
| <b>PXZ-Ph-TTR</b>                 | CT<br>(0.2247)    | CT-LE<br>(0.5210) | LE<br>(0.7435)    | LE<br>(0.9473)    | LE<br>(0.8069)    | LE<br>(0.7076)    |
| <b>PTZ-TTR</b><br>(Planar)        | LE<br>(0.6951)    | LE<br>(0.8187)    | LE<br>(0.7689)    | LE<br>(0.9175)    | LE<br>(0.8723)    | LE<br>(0.9630)    |
| <b>PTZ-TTR</b><br>(Orthogonal)    | CT<br>(0.1588)    | CT<br>(0.1974)    | LE<br>(0.7363)    | CT-LE<br>(0.5658) | LE<br>(0.7236)    | LE<br>(0.9450)    |
| <b>PTZ-Ph-TTR</b><br>(Planar)     | CT-LE<br>(0.6631) | LE<br>(0.8496)    | LE<br>(0.8313)    | LE<br>(0.8525)    | LE<br>(0.9040)    | LE<br>(0.8741)    |
| <b>PTZ-Ph-TTR</b><br>(Orthogonal) | CT<br>(0.3481)    | LE<br>(0.7746)    | CT-LE<br>(0.4652) | LE<br>(0.9449)    | LE<br>(0.6797)    | LE<br>(0.6983)    |

**Table S26** Reorganization energies (kcal/mol) between the  $S_1$  and  $T_1$  geometries of selected compounds.

| Compound        | Reorganization Energy |
|-----------------|-----------------------|
| m-Cz-DPS-Cz     | 6.51                  |
| m-PTZ-DPS-PTZ   | 6.00                  |
| m-PXZ-DPS-PXZ   | 1.89                  |
| m-DMAC-DPS-DMAC | 0.32                  |
| m-DPA-DPS-DPA   | 0.08                  |
| p-Cz-DPS-Cz     | 4.36                  |
| p-PTZ-DPS-PTZ   | 1.79                  |
| p-PXZ-DPS-PXZ   | 1.65                  |
| p-DMAC-DPS-DMAC | 3.54                  |
| p-DPA-DPS-DPA   | 10.24                 |
| TXO2-PXZ        | 0.92                  |
| TXO2-DMAC       | 0.49                  |
| DBTO-NO         | 0.20                  |
| DBTO-DMAC       | 0.37                  |
| DMAC-TTR        | 0.78                  |
| PTZ-TTR         | 5.38                  |
| Cz-Ph-TTR       | 5.43                  |
| DMAC-Ph-TTR     | 2.13                  |
| PXZ-Ph-TTR      | 0.35                  |
| PTZ-Ph-TTR      | 3.60                  |

The reorganization energies of the molecule set under investigation have been calculated at the M062X/6-31+G(d,p) level of theory. As reported in Table S26, reorganization energies lie between 0.08 and 10.24 kcal/mol and it should be noted that the emitters, m-DPA-DPS-DPA, DBTO-NO, m-DMAC-DPS-DMAC, DBTO-DMAC, PXZ-Ph-TTR and TXO2-DMAC represented the smallest reorganization energies which range between 0.08 kcal/mol and 0.49 kcal/mol respectively. On the other hand, some emitters represent values around the 5 - 10 kcal/mol, which are less favorable for RISC. Considering all the data reported in Table S26, no systematic behavior was observed between the group of molecules, thus hampering the use of this parameter in comparisons.

**Table S27** Electron and hole orbitals of sulfone based emitters computed from ground state geometries at M062X/6-31+G(d,p) level of theory.

| Molecule      | M062X/6-31+G(d,p)                                                                   |                                                                                     |                                                                                      |                                                                                       |
|---------------|-------------------------------------------------------------------------------------|-------------------------------------------------------------------------------------|--------------------------------------------------------------------------------------|---------------------------------------------------------------------------------------|
|               | $S_0 \rightarrow S_1$ Excitation                                                    |                                                                                     | $S_0 \rightarrow T_1$ Excitation                                                     |                                                                                       |
|               | HOLE                                                                                | ELECTRON                                                                            | HOLE                                                                                 | ELECTRON                                                                              |
| m-Cz-DPS-Cz   | 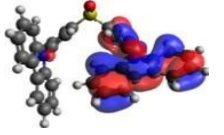   |    |    |    |
| p-Cz-DPS-Cz   |    |    |    |    |
| m-PTZ-DPS-PTZ |    |    |    |    |
| p-PTZ-DPS-PTZ |  |  |  |  |
| m-PXZ-DPS-PXZ |  |  |  |  |
| p-PXZ-DPS-PXZ |  |  |  |  |

|                 |                                                                                     |                                                                                     |                                                                                      |                                                                                       |
|-----------------|-------------------------------------------------------------------------------------|-------------------------------------------------------------------------------------|--------------------------------------------------------------------------------------|---------------------------------------------------------------------------------------|
| m-DMAC-DPS-DMAC | $S_0 \rightarrow S_1$ Excitation                                                    |                                                                                     | $S_0 \rightarrow T_1$ Excitation                                                     |                                                                                       |
|                 | HOLE                                                                                | ELECTRON                                                                            | HOLE                                                                                 | ELECTRON                                                                              |
|                 | 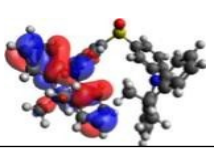   |    |    |    |
|                 |                                                                                     |                                                                                     |                                                                                      |                                                                                       |
| p-DMAC-DPS-DMAC | $S_0 \rightarrow S_1$ Excitation                                                    |                                                                                     | $S_0 \rightarrow T_1$ Excitation                                                     |                                                                                       |
|                 | HOLE                                                                                | ELECTRON                                                                            | HOLE                                                                                 | ELECTRON                                                                              |
|                 |    |    |    |    |
|                 |                                                                                     |                                                                                     |                                                                                      |                                                                                       |
| m-DPA-DPS-DPA   | $S_0 \rightarrow S_1$ Excitation                                                    |                                                                                     | $S_0 \rightarrow T_1$ Excitation                                                     |                                                                                       |
|                 | HOLE                                                                                | ELECTRON                                                                            | HOLE                                                                                 | ELECTRON                                                                              |
|                 |    |    |    |    |
|                 |                                                                                     |                                                                                     |                                                                                      |                                                                                       |
| p-DPA-DPS-DPA   | $S_0 \rightarrow S_1$ Excitation                                                    |                                                                                     | $S_0 \rightarrow T_1$ Excitation                                                     |                                                                                       |
|                 | HOLE                                                                                | ELECTRON                                                                            | HOLE                                                                                 | ELECTRON                                                                              |
|                 |   |   |   |   |
|                 |                                                                                     |                                                                                     |                                                                                      |                                                                                       |
| TXO2-NO         | $S_0 \rightarrow S_1$ Excitation                                                    |                                                                                     | $S_0 \rightarrow T_1$ Excitation                                                     |                                                                                       |
|                 | HOLE                                                                                | ELECTRON                                                                            | HOLE                                                                                 | ELECTRON                                                                              |
|                 |  |  |  |  |
|                 |                                                                                     |                                                                                     |                                                                                      |                                                                                       |
| DBTO-NO         | $S_0 \rightarrow S_1$ Excitation                                                    |                                                                                     | $S_0 \rightarrow T_1$ Excitation                                                     |                                                                                       |
|                 | HOLE                                                                                | ELECTRON                                                                            | HOLE                                                                                 | ELECTRON                                                                              |
|                 |  |  |  |  |
|                 |                                                                                     |                                                                                     |                                                                                      |                                                                                       |
| TXO2-ACR        | $S_0 \rightarrow S_1$ Excitation                                                    |                                                                                     | $S_0 \rightarrow T_1$ Excitation                                                     |                                                                                       |
|                 | HOLE                                                                                | ELECTRON                                                                            | HOLE                                                                                 | ELECTRON                                                                              |
|                 |  |  |  |  |
|                 |                                                                                     |                                                                                     |                                                                                      |                                                                                       |
| DBTO-ACR        | $S_0 \rightarrow S_1$ Excitation                                                    |                                                                                     | $S_0 \rightarrow T_1$ Excitation                                                     |                                                                                       |
|                 | HOLE                                                                                | ELECTRON                                                                            | HOLE                                                                                 | ELECTRON                                                                              |
|                 |  |  |  |  |
|                 |                                                                                     |                                                                                     |                                                                                      |                                                                                       |

|             |                                                                                     |                                                                                     |                                                                                      |                                                                                       |
|-------------|-------------------------------------------------------------------------------------|-------------------------------------------------------------------------------------|--------------------------------------------------------------------------------------|---------------------------------------------------------------------------------------|
| Cz-TTR      | $S_0 \rightarrow S_1$ Excitation                                                    |                                                                                     | $S_0 \rightarrow T_1$ Excitation                                                     |                                                                                       |
|             | HOLE                                                                                | ELECTRON                                                                            | HOLE                                                                                 | ELECTRON                                                                              |
|             | 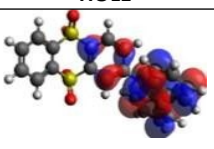   |    |    |    |
|             | $S_0 \rightarrow S_1$ Excitation                                                    |                                                                                     | $S_0 \rightarrow T_1$ Excitation                                                     |                                                                                       |
| DMAC-TTR    | HOLE                                                                                | ELECTRON                                                                            | HOLE                                                                                 | ELECTRON                                                                              |
|             |    |    |    |    |
|             | $S_0 \rightarrow S_1$ Excitation                                                    |                                                                                     | $S_0 \rightarrow T_1$ Excitation                                                     |                                                                                       |
|             | HOLE                                                                                | ELECTRON                                                                            | HOLE                                                                                 | ELECTRON                                                                              |
| PXZ-TTR     | HOLE                                                                                | ELECTRON                                                                            | HOLE                                                                                 | ELECTRON                                                                              |
|             |    |    |    |    |
|             | $S_0 \rightarrow S_1$ Excitation                                                    |                                                                                     | $S_0 \rightarrow T_1$ Excitation                                                     |                                                                                       |
|             | HOLE                                                                                | ELECTRON                                                                            | HOLE                                                                                 | ELECTRON                                                                              |
| PTZ-TTR     | HOLE                                                                                | ELECTRON                                                                            | HOLE                                                                                 | ELECTRON                                                                              |
|             |   |   |   |   |
|             | $S_0 \rightarrow S_1$ Excitation                                                    |                                                                                     | $S_0 \rightarrow T_1$ Excitation                                                     |                                                                                       |
|             | HOLE                                                                                | ELECTRON                                                                            | HOLE                                                                                 | ELECTRON                                                                              |
| Cz-Ph-TTR   | HOLE                                                                                | ELECTRON                                                                            | HOLE                                                                                 | ELECTRON                                                                              |
|             |  |  |  |  |
|             | $S_0 \rightarrow S_1$ Excitation                                                    |                                                                                     | $S_0 \rightarrow T_1$ Excitation                                                     |                                                                                       |
|             | HOLE                                                                                | ELECTRON                                                                            | HOLE                                                                                 | ELECTRON                                                                              |
| DMAC-Ph-TTR | HOLE                                                                                | ELECTRON                                                                            | HOLE                                                                                 | ELECTRON                                                                              |
|             |  |  |  |  |
|             | $S_0 \rightarrow S_1$ Excitation                                                    |                                                                                     | $S_0 \rightarrow T_1$ Excitation                                                     |                                                                                       |
|             | HOLE                                                                                | ELECTRON                                                                            | HOLE                                                                                 | ELECTRON                                                                              |
| PXZ-Ph-TTR  | HOLE                                                                                | ELECTRON                                                                            | HOLE                                                                                 | ELECTRON                                                                              |
|             |  |  |  |  |
|             | $S_0 \rightarrow S_1$ Excitation                                                    |                                                                                     | $S_0 \rightarrow T_1$ Excitation                                                     |                                                                                       |
|             | HOLE                                                                                | ELECTRON                                                                            | HOLE                                                                                 | ELECTRON                                                                              |
| PTZ-Ph-TTR  | HOLE                                                                                | ELECTRON                                                                            | HOLE                                                                                 | ELECTRON                                                                              |
|             |  |  |  |  |
|             | $S_0 \rightarrow S_1$ Excitation                                                    |                                                                                     | $S_0 \rightarrow T_1$ Excitation                                                     |                                                                                       |
|             | HOLE                                                                                | ELECTRON                                                                            | HOLE                                                                                 | ELECTRON                                                                              |



**Figure S7** Absorption Spectra of Sulfone Based TADF Emitters computed at B3LYP/6-31+G(d,p), M06-2X/6-31+G(d,p), PBE0/6-31+G(d,p) and BLYP/6-31+G(d,p) level of theories.

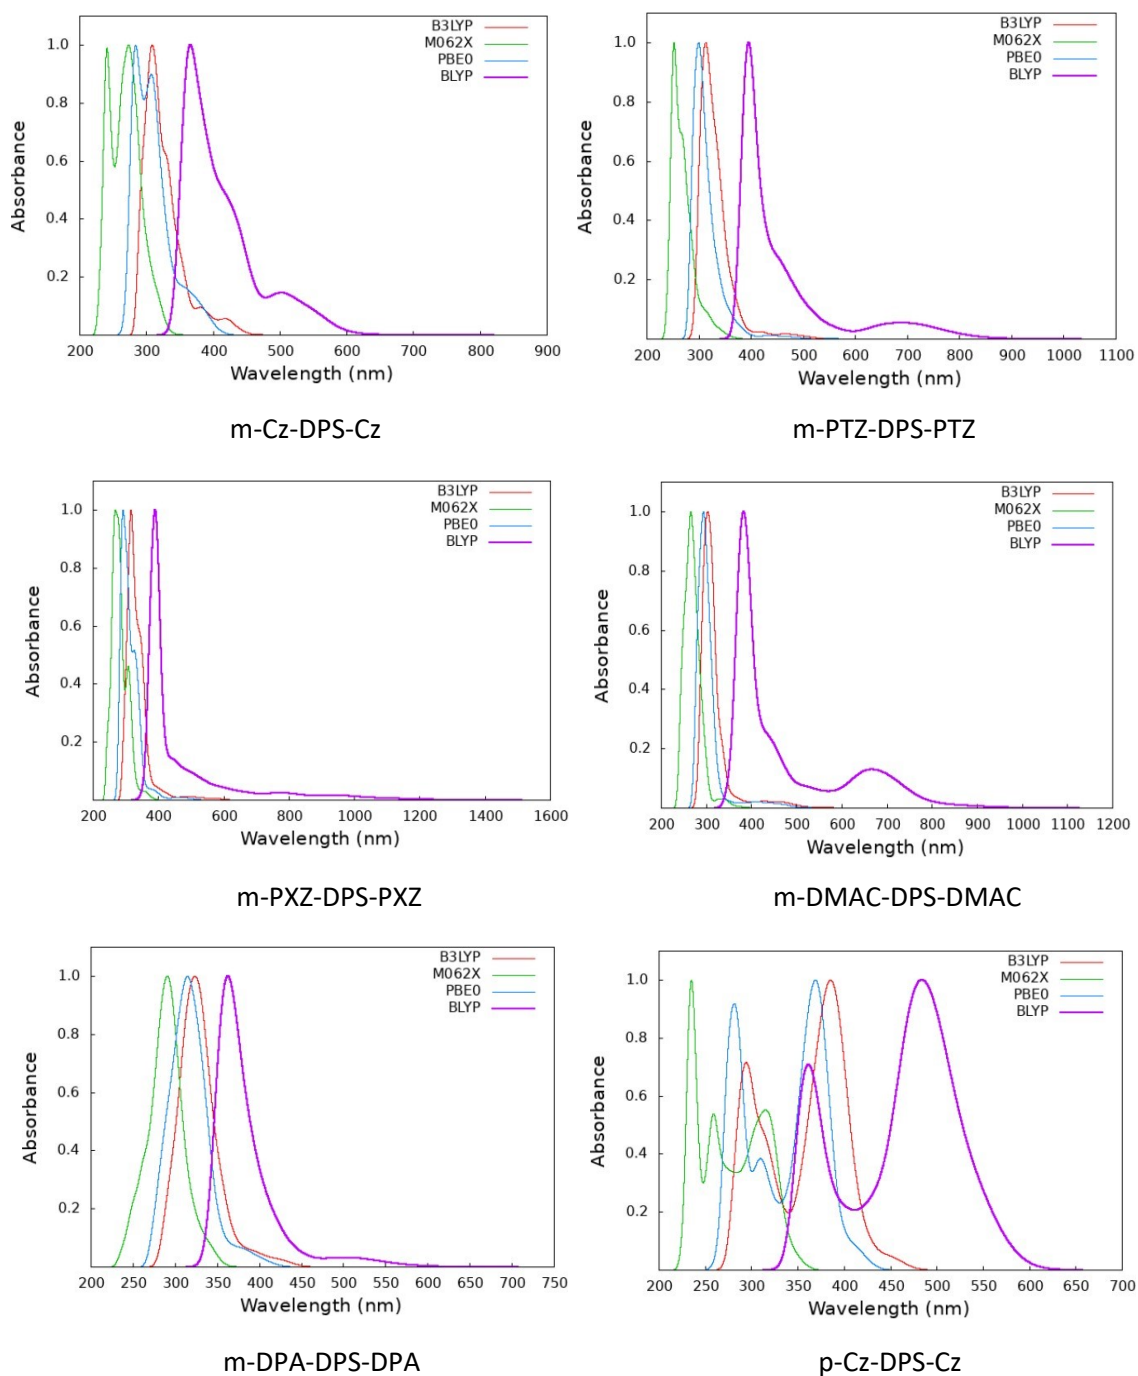



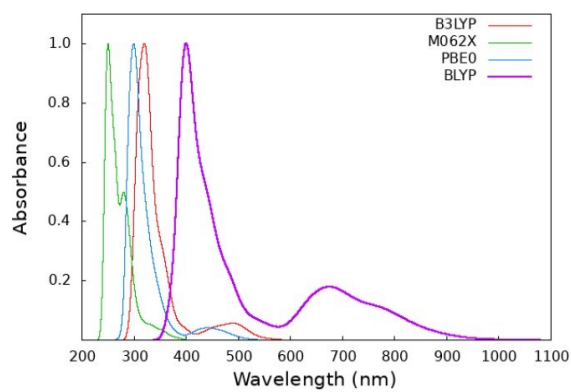

p-PTZ-DPS-PTZ

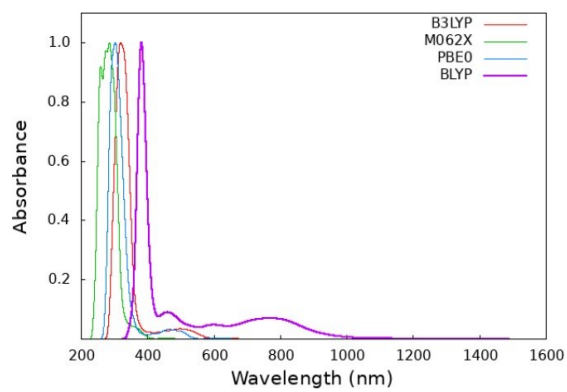

p-PXZ-DPS-PXZ

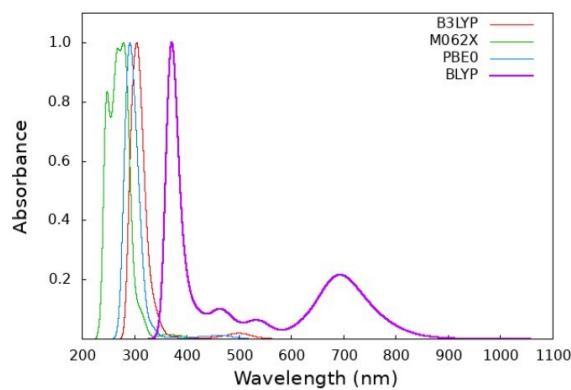

p-DMAD-DPS-DMAC

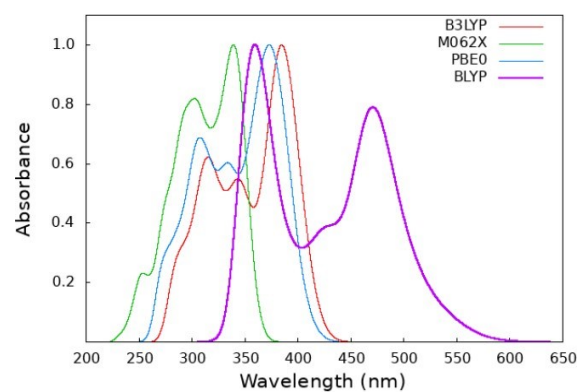

p-DPA-DPS-DPA

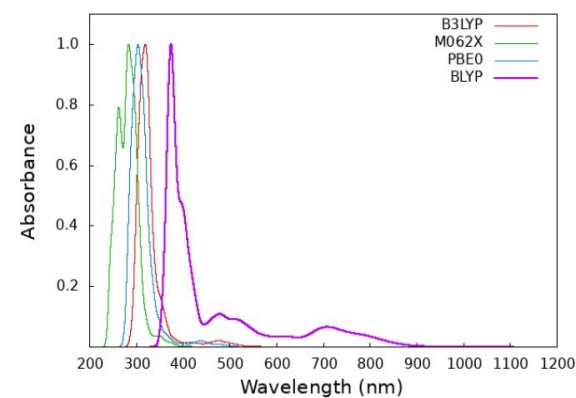

TXO2-NO

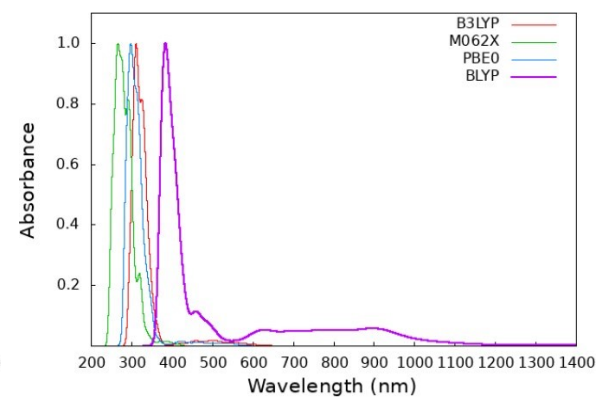

DBTO-NO

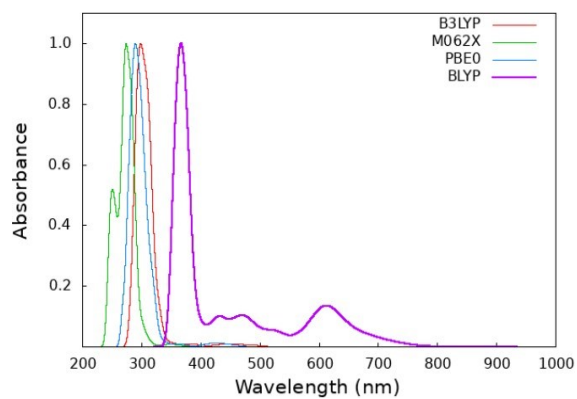

TXO2-ACR

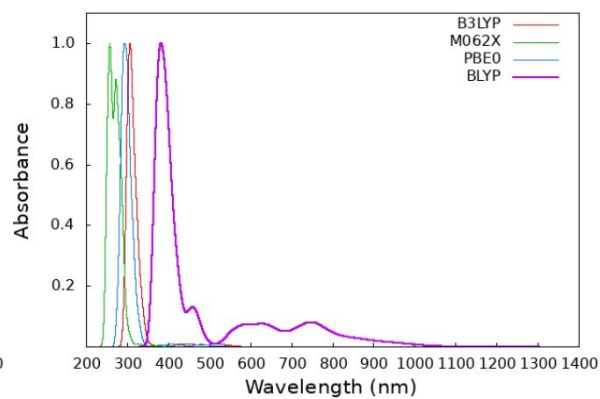

DBTO-ACR

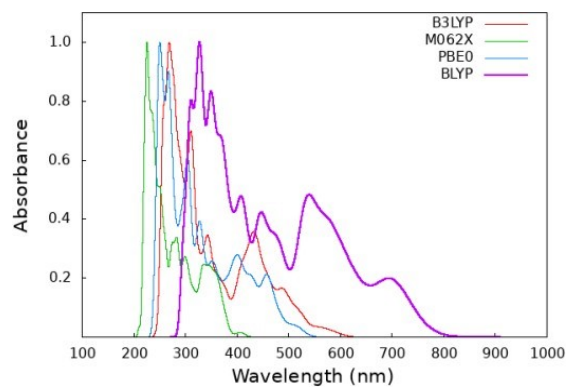

Cz-TTR

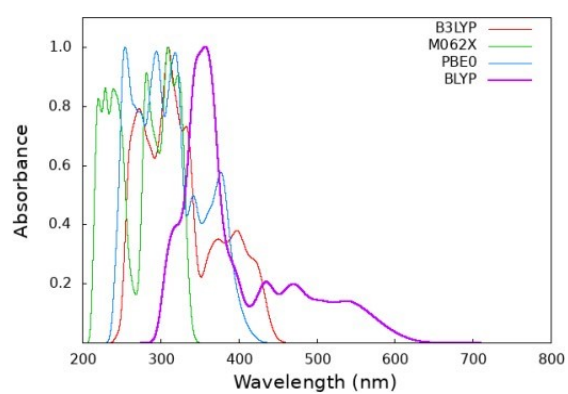

DMAC-TTR

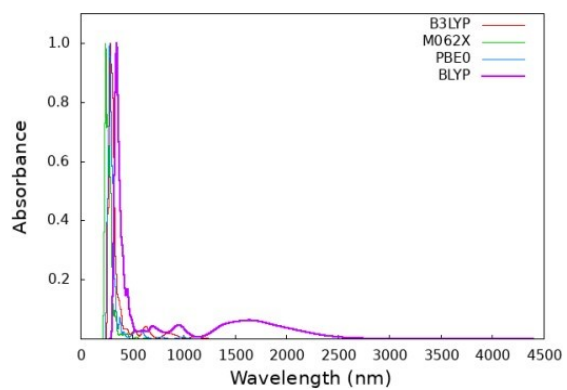

PXZ-TTR

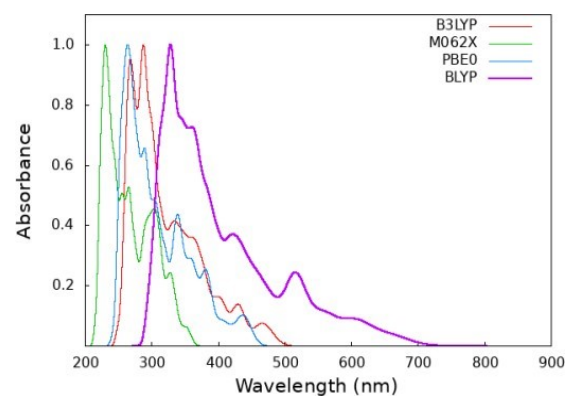

PTZ-TTR

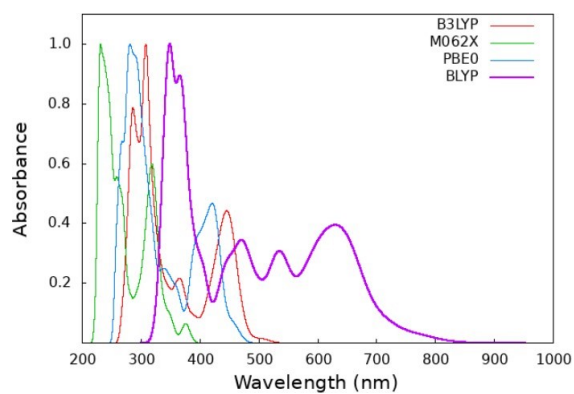

Cz-Ph-TTR

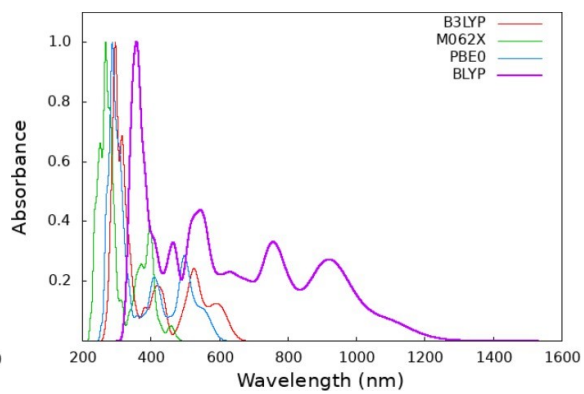

DMAC-Ph-TTR

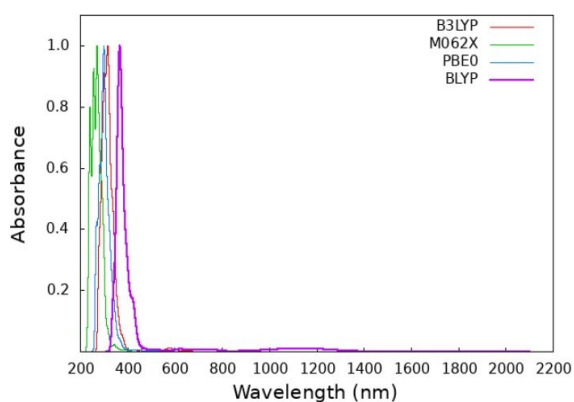

PXZ-Ph-TTR

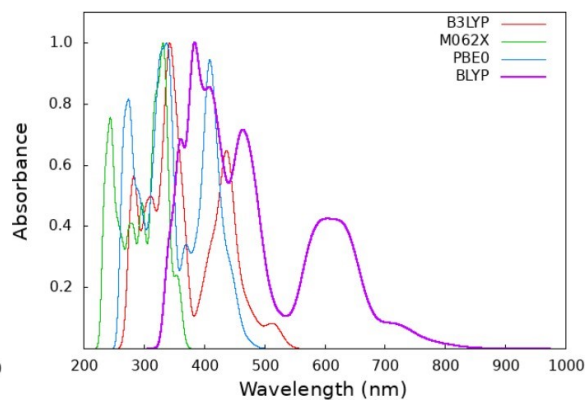

PTZ-Ph-TTR

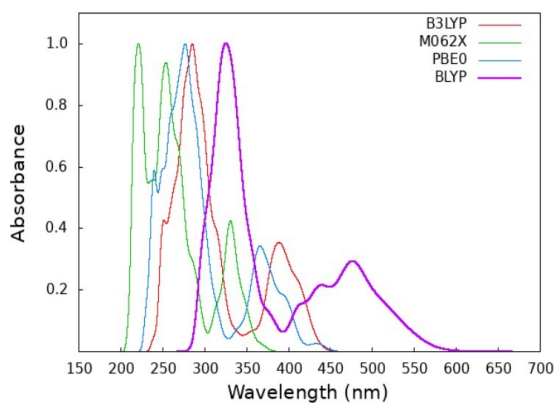

AC-OSO

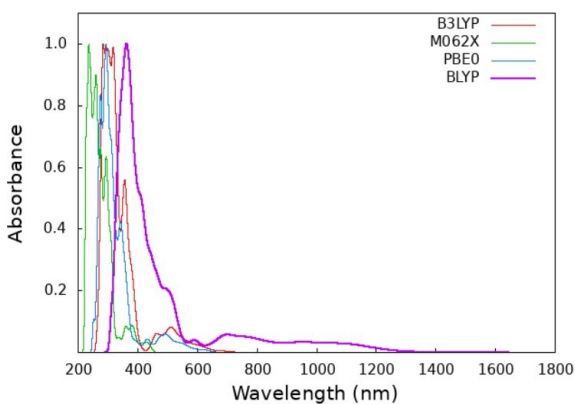

CzSOXO

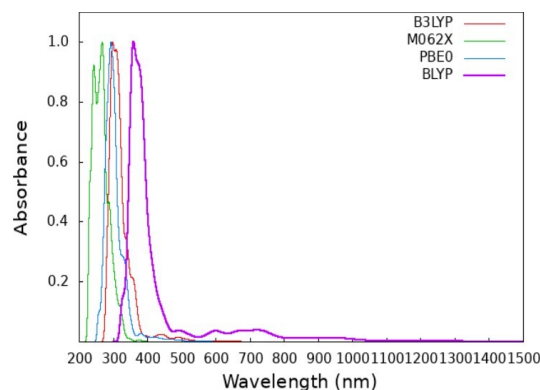

TXO-Ph-Cz

**Table S28** Experimental absorption wavelengths of the modeled sulfone based TADF emitters.

| Emitter         | Experimental Maximum Absorption Wavelength | Experimental Reference | Theoretical Data*      |
|-----------------|--------------------------------------------|------------------------|------------------------|
| m-Cz-DPS-Cz     | 338 nm                                     | 1                      | 290 nm                 |
| m-PTZ-DPS-PTZ   | 304 nm                                     | 1                      | 315 nm                 |
| m-PXZ-DPS-PXZ   | 308 nm                                     | 1                      | 300 nm                 |
| m-DMAC-DPS-DMAC | 301 nm                                     | 1                      | 320 nm                 |
| p-Cz-DPS-Cz     | 350 nm                                     | 2                      | 325 nm                 |
| p-PTZ-DPS-PTZ   | 209 nm, 255 nm, 319 nm                     | 3                      | 220 nm, 260 nm, 325 nm |
| p-PXZ-DPS-PXZ   | 325 nm                                     | 4                      | 300 nm                 |
| p-DMAC-DPS-DMAC | 286 nm                                     | 4                      | 290 nm                 |
| p-DPA-DPS-DPA   | 350 nm                                     | 5                      | 345 nm                 |
| TXO2-NO         | 325 nm, 309 nm                             | 6                      | 300 nm                 |
| DBTO-NO         | 240 nm, 320 nm, 400 nm                     | 5                      | 250 nm, 315 nm, 390 nm |
| TXO2-ACR        | 290 nm, 365 nm                             | 7                      | 290 nm, 370 nm         |
| DBTO-ACR        | 284 nm, 376 nm                             | 7                      | 280 nm, 350 nm         |
| Cz-TTR          | 290 nm, 325 nm, 370 nm                     | 8                      | 290 nm, 330 nm, 360 nm |
| DMAC-TTR        | 290 nm, 320 nm, 365 nm                     | 9                      | 280 nm, 305 nm, 310 nm |
| PXZ-TTR         | -                                          | 10                     | -                      |
| PTZ-TTR         | 315 nm, 360 nm                             | 9                      | 302 nm, 350 nm         |
| Cz-Ph-TTR       | 290 nm, 380 nm                             | 11                     | 305 nm, 380 nm         |
| DMAC-Ph-TTR     | 290 nm, 390 nm                             | 9                      | 290 nm, 400 nm         |
| PXZ-Ph-TTR      | 300 nm, 405 nm                             | 12                     | 300 nm, 390 nm         |
| PTZ-Ph-TTR      | 290 nm, 375 nm                             | 9                      | 300 nm, 325 nm, 370 nm |

\*Theoretical data were obtained from calculations at M062X/6-31+G(d,p) level of theory.

### Findings From The Absorption Spectra Analyses

Absorption spectra calculations via Wigner distribution method have been performed with B3LYP,<sup>13</sup> PBE0,<sup>14</sup> M062X and BLYP<sup>13</sup> functionals using the 6-31+G(d,p) basis set. The main purpose of absorption spectra analyses was observing the effect of functional choice in excited state energies and oscillator strengths. Analyses with M062X represented a blue shifted spectra compared to the hybrid B3LYP, PBE0 and BLYP functionals. Additionally, we also observed that while B3LYP and PBE0 behaves highly similar to each other, BLYP represents red shifted absorption spectra for all compounds. The choice of various functionals for spectra analyses gave us the opportunity to observe the effect of different methodologies on absorption spectra.

While comparing experimental and theoretical spectra, we focused on the data obtained from M062X, which is the best performing functional in reproducing TADF descriptors. As reported in Table S28, M062X well reproduced the absorption spectra of emitters with some exceptions such as *m*-Cz-DPS-Cz<sup>1</sup> (~50 nm shift), *p*-Cz-DPS-Cz<sup>1</sup> (~25 nm shift) and *p*-PXZ-DPS-PXZ,<sup>15</sup> (~25 nm shift). For the other emitters, Table S28 represents that the absorption wavelength differences between the calculated and experimental data are in the range of ~ 0 nm -10 nm.

- O. Bezikonnyi, D. Gudeika, D. Volyniuk, V. Mimaite, B. R. Sebastine and J. V. Grazulevicius, Effect of donor substituents on thermally activated delayed fluorescence of diphenylsulfone derivatives, *J. Lumin.*, 2019, **206**, 250–259.
- Z. Xie, C. Chen, S. Xu, J. Li, Y. Zhang, S. Liu, J. Xu and Z. Chi, White-Light Emission Strategy of a Single Organic Compound with Aggregation-Induced Emission and Delayed Fluorescence Properties, *Angew. Chemie - Int. Ed.*, 2015, **54**, 7181–7184.
- I. H. Lee, W. Song and J. Y. Lee, Aggregation-induced emission type thermally activated delayed fluorescent materials for high efficiency in non-doped organic light-emitting diodes, *Org. Electron.*, 2016, **29**, 22–26.
- Q. Zhang, D. Tsang, H. Kuwabara, Y. Hatae, B. Li, T. Takahashi, S. Y. Lee, T. Yasuda and C. Adachi, Nearly 100% internal quantum efficiency in undoped electroluminescent devices employing pure organic emitters, *Adv. Mater.*, 2015, **27**, 2096–2100.
- Q. Zhang, J. Li, K. Shizu, S. Huang, S. Hirata, H. Miyazaki and C. Adachi, Design of efficient thermally activated delayed fluorescence materials for pure blue organic light emitting diodes, *J. Am. Chem. Soc.*, 2012, **134**, 14706–14709.
- D. D. S. Pereira, P. L. Dos Santos, J. S. Ward, P. Data, M. Okazaki, Y. Takeda, S. Minakata, M. R. Bryce and A. P. Monkman, An optical and electrical study of full thermally activated delayed fluorescent white organic light-emitting diodes, *Sci. Rep.*, 2017, **7**, 1–8.
- N. A. Kukhta, A. S. Batsanov, M. R. Bryce and A. P. Monkman, Importance of Chromophore Rigidity on the Efficiency of Blue Thermally Activated Delayed Fluorescence Emitters, *J. Phys. Chem. C*, 2018, **122**, 28564–28575.
- K. Wang, W. Liu, C. J. Zheng, Y. Z. Shi, K. Liang, M. Zhang, X. M. Ou and X. H. Zhang, A comparative study of carbazole-based thermally activated delayed fluorescence emitters with different steric hindrance, *J. Mater. Chem. C*, 2017, **5**, 4797–4803.
- K. Wang, Y. Z. Shi, C. J. Zheng, W. Liu, K. Liang, X. Li, M. Zhang, H. Lin, S. L. Tao, C. S. Lee, X. M. Ou and X. H. Zhang, Control of Dual Conformations: Developing Thermally Activated Delayed Fluorescence Emitters for Highly Efficient Single-Emitter White Organic Light-Emitting Diodes, *ACS Appl. Mater. Interfaces*, 2018, **10**, 31515–31525.
- K. Wang, C. J. Zheng, W. Liu, K. Liang, Y. Z. Shi, S. L. Tao, C. S. Lee, X. M. Ou and X. H. Zhang, Avoiding Energy Loss on TADF Emitters: Controlling the Dual Conformations of D–A Structure Molecules Based on the Pseudoplanar Segments, *Adv. Mater.*, 2017, **29**, 1–9.
- K. Sun, Y. Sun, W. Jiang, S. Huang, W. Tian and Y. Sun, Highly efficient and color tunable thermally activated delayed fluorescent emitters and their applications for the solution-processed OLEDs, *Dye. Pigment.*, 2017, **139**, 326–333.
- G. Xie, X. Li, D. Chen, Z. Wang, X. Cai, D. Chen, Y. Li, K. Liu, Y. Cao and S. J. Su, Evaporation- and Solution-Process-Feasible Highly Efficient Thianthrene-9,9',10,10'-Tetraoxide-Based Thermally Activated Delayed Fluorescence Emitters with Reduced Efficiency Roll-Off, *Adv. Mater.*, 2016, **28**, 181–187.
- A. D. Becke, Density-functional thermochemistry. III. The role of exact exchange, *J. Chem. Phys.*, 1993, **98**, 5648–52.
- C. Adamo and V. Barone, Toward reliable density functional methods without adjustable parameters: The PBE0 model, *J. Chem. Phys.*, 1999, **110**, 6158–69.
- G. Li, F. Zhan, W. Lou, D. Wang, C. Deng, L. Cao, Y. Yang, Q. Zhang and Y. She, Efficient deep-blue organic light-emitting diodes employing difluoroboron-enabled thermally activated delayed fluorescence emitters, *J. Mater. Chem. C*, 2020, **8**, 17464–17473.

**Table S29** Relative energies of the different conformers of the emitters *m*-Cz-DPS-Cz and *m*-PTZ-DPS-PTZ computed at M06-2X/6-31+G(d,p) level of theory.

| Compound            | Conformer | $\Delta G_{\text{rel}}$<br>(kcal/mol) |
|---------------------|-----------|---------------------------------------|
| <i>m</i> -Cz-DPS-Cz | Conf. 1   | 0.00                                  |
|                     | Conf. 2   | 0.00                                  |
|                     | Conf. 3   | 0.35                                  |
|                     | Conf. 4   | 0.36                                  |
|                     | Conf. 5   | 0.66                                  |

|                             |          |      |
|-----------------------------|----------|------|
|                             | Conf. 6  | 0.89 |
|                             | Conf. 7  | 0.89 |
|                             | Conf. 8  | 1.00 |
|                             | Conf. 9  | 1.70 |
| <b><i>m</i>-PTZ-DPS-PTZ</b> | Conf. 1  | 0.00 |
|                             | Conf. 2  | 0.04 |
|                             | Conf. 3  | 0.05 |
|                             | Conf. 4  | 0.17 |
|                             | Conf. 5  | 0.17 |
|                             | Conf. 6  | 0.67 |
|                             | Conf. 7  | 0.83 |
|                             | Conf. 8  | 0.91 |
|                             | Conf. 9  | 0.93 |
|                             | Conf. 10 | 0.98 |
|                             | Conf. 11 | 1.04 |
|                             | Conf. 12 | 1.25 |
|                             | Conf. 13 | 1.25 |
|                             | Conf. 14 | 1.32 |
|                             | Conf. 15 | 1.33 |
|                             | Conf. 16 | 1.51 |
|                             | Conf. 17 | 1.63 |
|                             | Conf. 18 | 1.88 |
|                             | Conf. 19 | 1.95 |
|                             | Conf. 20 | 1.95 |
|                             | Conf. 21 | 1.98 |
|                             | Conf. 22 | 2.05 |
|                             | Conf. 23 | 2.29 |
|                             | Conf. 24 | 2.29 |
|                             | Conf. 25 | 2.42 |
|                             | Conf. 26 | 2.42 |
|                             | Conf. 27 | 2.58 |
|                             | Conf. 28 | 2.90 |
| Conf. 29                    | 2.90     |      |
| Conf. 30                    | 3.06     |      |
| Conf. 31                    | 3.22     |      |
| Conf. 32                    | 3.31     |      |

**Table S30** Relative energies of the different conformers of the emitters *m*-Cz-DPS-Cz and *m*-PTZ-DPS-PTZ computed at M06-2X/6-31+G(d,p) level of theory.

| Compound                | Conformer | $\Delta G_{\text{rel}}$<br>(kcal/mol) |
|-------------------------|-----------|---------------------------------------|
| <i>m</i> -PXZ-DPS-PXZ   | Conf. 1   | 0.00                                  |
|                         | Conf. 2   | 0.18                                  |
|                         | Conf. 3   | 0.21                                  |
|                         | Conf. 4   | 0.32                                  |
|                         | Conf. 5   | 0.32                                  |
|                         | Conf. 6   | 0.61                                  |
|                         | Conf. 7   | 0.65                                  |
|                         | Conf. 8   | 0.93                                  |
|                         | Conf. 9   | 0.94                                  |
|                         | Conf. 10  | 0.98                                  |
|                         | Conf. 11  | 0.99                                  |
|                         | Conf. 12  | 1.27                                  |
|                         | Conf. 13  | 1.28                                  |
|                         | Conf. 14  | 1.28                                  |
|                         | Conf. 15  | 1.32                                  |
|                         | Conf. 16  | 1.56                                  |
|                         | Conf. 17  | 2.16                                  |
| <i>m</i> -DMAC-DPS-DMAC | Conf. 1   | 0.00                                  |
|                         | Conf. 2   | 0.05                                  |
|                         | Conf. 3   | 0.19                                  |
|                         | Conf. 4   | 0.20                                  |
|                         | Conf. 5   | 0.52                                  |
|                         | Conf. 6   | 0.52                                  |
|                         | Conf. 7   | 0.58                                  |
|                         | Conf. 8   | 0.59                                  |
|                         | Conf. 9   | 0.66                                  |
|                         | Conf. 10  | 0.73                                  |
|                         | Conf. 11  | 1.15                                  |
|                         | Conf. 12  | 1.72                                  |
|                         | Conf. 13  | 1.73                                  |
|                         | Conf. 14  | 1.77                                  |
|                         | Conf. 15  | 1.97                                  |
|                         | Conf. 16  | 1.98                                  |
|                         | Conf. 17  | 2.85                                  |
|                         | Conf. 18  | 2.85                                  |
|                         | Conf. 19  | 3.79                                  |
|                         | Conf. 20  | 3.79                                  |
|                         | Conf. 21  | 4.37                                  |
|                         | Conf. 22  | 4.39                                  |
|                         | Conf. 23  | 4.63                                  |
|                         | Conf. 24  | 4.64                                  |



**Table S31** Relative energies of the different conformers of the emitter *m*-DPA-DPS-DPA computed at M06-2X/6-31+G(d,p) level of theory.

| Compound                    | Conformer | $\Delta G_{rel}$<br>(kcal/mol) |
|-----------------------------|-----------|--------------------------------|
| <b><i>m</i>-DPA-DPS-DPA</b> | Conf. 1   | 0.00                           |
|                             | Conf. 2   | 0.11                           |
|                             | Conf. 3   | 0.12                           |
|                             | Conf. 4   | 0.32                           |
|                             | Conf. 5   | 0.32                           |
|                             | Conf. 6   | 0.51                           |
|                             | Conf. 7   | 0.51                           |
|                             | Conf. 8   | 1.71                           |
|                             | Conf. 9   | 1.72                           |
|                             | Conf. 10  | 2.67                           |
|                             | Conf. 11  | 3.13                           |

**Table S32** Relative energies of the different conformers of Group 2 emitters computed at M06-2X/6-31+G(d,p) level of theory.

| Compound               | Conformer | $\Delta G_{rel}$<br>(kcal/mol) |
|------------------------|-----------|--------------------------------|
| <b>p-Cz-DPS-Cz</b>     | Conf. 1   | 0.00                           |
|                        | Conf. 2   | 0.31                           |
|                        | Conf. 3   | 1.33                           |
|                        | Conf. 4   | 1.33                           |
| <b>p-PTZ-DPS-PTZ</b>   | Conf. 1   | 0.00                           |
|                        | Conf. 2   | 0.64                           |
|                        | Conf. 3   | 0.66                           |
|                        | Conf. 4   | 0.67                           |
|                        | Conf. 5   | 0.70                           |
|                        | Conf. 6   | 0.70                           |
| <b>p-PXZ-DPS-PXZ</b>   | Conf. 1   | 0.00                           |
|                        | Conf. 2   | 0.01                           |
|                        | Conf. 3   | 0.13                           |
|                        | Conf. 4   | 0.24                           |
|                        | Conf. 5   | 1.05                           |
|                        | Conf. 6   | 1.05                           |
| <b>p-DMAC-DPS-DMAC</b> | Conf. 1   | 0.00                           |
|                        | Conf. 2   | 1.38                           |
|                        | Conf. 3   | 1.98                           |
| <b>p-DPA-DPS-DPA</b>   | Conf. 1   | 0.00                           |
|                        | Conf. 2   | 0.00                           |
|                        | Conf. 3   | 0.24                           |
|                        | Conf. 4   | 0.36                           |
|                        | Conf. 5   | 1.26                           |

**Table S33** Relative energies of the different conformers of Group 3 emitters computed at M06-2X/6-31+G(d,p) level of theory.

| Compound | Conformer | $\Delta G_{rel}$<br>(kcal/mol) |
|----------|-----------|--------------------------------|
| TXO2-NO  | Conf. 1   | 0.00                           |
|          | Conf. 2   | 0.11                           |
|          | Conf. 3   | 0.15                           |
|          | Conf. 4   | 0.16                           |
| DBTO-NO  | Conf. 1   | 0.00                           |
|          | Conf. 2   | 0.24                           |
|          | Conf. 3   | 0.30                           |
|          | Conf. 4   | 0.40                           |
| TXO2-ACR | Conf. 1   | 0.00                           |
| DBTO-ACR | Conf. 1   | 0.00                           |

**Table S34** Relative energies of the different conformers of Group 4 emitters computed at M06-2X/6-31+G(d,p) level of theory.

| Compound | Conformer | $\Delta G_{rel}$<br>(kcal/mol) |
|----------|-----------|--------------------------------|
| Cz-TTR   | Conf. 1   | 0.00                           |
|          | Conf. 2   | 0.00                           |
|          | Conf. 3   | 0.35                           |
|          | Conf. 4   | 0.35                           |
| PXZ-TTR  | Conf. 1   | 0.00                           |
|          | Conf. 2   | 0.01                           |
|          | Conf. 3   | 0.02                           |
|          | Conf. 4   | 0.30                           |
|          | Conf. 5   | 0.83                           |
|          | Conf. 6   | 0.86                           |
|          | Conf. 7   | 0.91                           |
|          | Conf. 8   | 1.04                           |
| PTZ-TTR  | Conf. 1   | 0.00                           |
|          | Conf. 2   | 0.00                           |
|          | Conf. 3   | 0.69                           |
|          | Conf. 4   | 0.69                           |
|          | Conf. 5   | 3.21                           |
|          | Conf. 6   | 3.21                           |
|          | Conf. 7   | 3.70                           |
|          | Conf. 8   | 3.71                           |
| DMAC-TTR | Conf. 1   | 0.00                           |
|          | Conf. 2   | 0.00                           |
|          | Conf. 3   | 0.15                           |
|          | Conf. 4   | 0.15                           |
|          | Conf. 5   | 0.25                           |
|          | Conf. 6   | 0.26                           |
|          | Conf. 7   | 0.29                           |
|          | Conf. 8   | 0.29                           |
|          | Conf. 9   | 0.35                           |
|          | Conf. 10  | 0.36                           |

**Table S35** Relative energies of the different conformers of Group 5 emitters computed at M06-2X/6-31+G(d,p) level of theory.

| Compound           | Conformer | $\Delta G_{rel}$<br>(kcal/mol) |
|--------------------|-----------|--------------------------------|
| <b>Cz-Ph-TTR</b>   | Conf. 1   | 0.00                           |
|                    | Conf. 2   | 0.01                           |
|                    | Conf. 3   | 0.01                           |
|                    | Conf. 4   | 0.05                           |
|                    | Conf. 5   | 0.05                           |
|                    | Conf. 6   | 0.08                           |
|                    | Conf. 7   | 0.22                           |
|                    | Conf. 8   | 0.23                           |
| <b>PXZ-Ph-TTR</b>  | Conf. 1   | 0.00                           |
|                    | Conf. 2   | 0.00                           |
|                    | Conf. 3   | 0.03                           |
|                    | Conf. 4   | 0.04                           |
|                    | Conf. 5   | 0.05                           |
|                    | Conf. 6   | 0.40                           |
|                    | Conf. 7   | 3.45                           |
|                    | Conf. 8   | 3.46                           |
|                    | Conf. 9   | 3.47                           |
|                    | Conf. 10  | 3.56                           |
|                    | Conf. 11  | 3.56                           |
|                    | Conf. 12  | 3.80                           |
| <b>PTZ-Ph-TTR</b>  | Conf. 1   | 0.00                           |
|                    | Conf. 2   | 0.04                           |
|                    | Conf. 3   | 0.04                           |
|                    | Conf. 4   | 0.05                           |
|                    | Conf. 5   | 0.06                           |
|                    | Conf. 6   | 0.08                           |
|                    | Conf. 7   | 0.16                           |
|                    | Conf. 8   | 0.19                           |
|                    | Conf. 9   | 0.20                           |
|                    | Conf. 10  | 0.29                           |
|                    | Conf. 11  | 0.33                           |
|                    | Conf. 12  | 0.33                           |
|                    | Conf. 13  | 0.43                           |
|                    | Conf. 14  | 0.43                           |
|                    | Conf. 15  | 0.48                           |
|                    | Conf. 16  | 0.48                           |
| <b>DMAC-Ph-TTR</b> | Conf. 1   | 0.00                           |
|                    | Conf. 2   | 0.02                           |
|                    | Conf. 3   | 0.24                           |
|                    | Conf. 4   | 0.24                           |

## Cartesian Coordinates for The Ground State Geometries

***m*-Cz-DPS-Cz**

|   |          |          |          |
|---|----------|----------|----------|
| S | -0.17709 | 3.66918  | -0.84997 |
| O | -0.06718 | 3.11252  | -2.17367 |
| O | -0.27193 | 5.09173  | -0.64594 |
| C | 1.18771  | 3.05995  | 0.10327  |
| C | 3.18614  | 1.99957  | 1.68884  |
| C | 1.71419  | 1.81456  | -0.22342 |
| C | 1.6321   | 3.7867   | 1.20437  |
| C | 2.64251  | 3.24483  | 1.9965   |
| C | 2.71918  | 1.28236  | 0.58328  |
| H | 1.34938  | 1.26274  | -1.08564 |
| H | 1.197    | 4.75655  | 1.42243  |
| H | 3.01447  | 3.79812  | 2.85227  |
| H | 3.98164  | 1.57622  | 2.29471  |
| C | -1.5589  | 2.90342  | -0.04765 |
| C | -3.60797 | 1.6322   | 1.29801  |
| C | -2.30205 | 3.6243   | 0.8812   |
| C | -1.82811 | 1.56876  | -0.33853 |
| C | -2.85144 | 0.92594  | 0.35572  |
| C | -3.34517 | 2.977    | 1.54335  |
| H | -2.06766 | 4.66648  | 1.07003  |
| H | -1.264   | 1.03877  | -1.10046 |
| H | -3.94208 | 3.51834  | 2.26956  |
| H | -4.39441 | 1.11468  | 1.83883  |
| N | 3.2434   | 0.00317  | 0.28845  |
| N | -3.11476 | -0.43824 | 0.1081   |
| C | 3.74106  | -0.40873 | -0.94748 |
| C | 4.79632  | -1.69192 | -3.1596  |
| C | 4.01892  | -1.79123 | -0.89138 |
| C | 3.99084  | 0.34901  | -2.09363 |
| C | 4.51815  | -0.31477 | -3.19507 |
| C | 4.55301  | -2.43483 | -2.01148 |
| H | 3.78475  | 1.41394  | -2.12692 |
| H | 4.7207   | 0.2463   | -4.10175 |
| H | 4.77364  | -3.49786 | -1.98261 |
| H | 5.2077   | -2.17581 | -4.03918 |
| C | 3.1724   | -1.10426 | 1.13192  |
| C | 3.16324  | -3.58174 | 2.36772  |
| C | 2.67837  | -1.19207 | 2.43574  |
| C | 3.64927  | -2.23835 | 0.43713  |
| C | 3.64549  | -3.48574 | 1.06714  |
| C | 2.6829   | -2.44494 | 3.03916  |
| H | 2.29004  | -0.3222  | 2.95571  |
| H | 4.00261  | -4.36722 | 0.5425   |
| H | 2.29619  | -2.54598 | 4.04816  |
| H | 3.14811  | -4.54382 | 2.86902  |
| C | -2.17513 | -1.47026 | 0.15969  |
| C | -0.73887 | -3.83886 | 0.16856  |
| C | -2.8203  | -2.68724 | -0.15096 |
| C | -0.81837 | -1.42285 | 0.49489  |
| C | -0.11465 | -2.62258 | 0.49188  |
| C | -2.0905  | -3.87963 | -0.14858 |
| H | -0.32523 | -0.49108 | 0.75926  |
| H | 0.93911  | -2.62007 | 0.75406  |
| H | -2.57666 | -4.82138 | -0.38648 |
| H | -0.15475 | -4.75337 | 0.17522  |
| C | -4.35411 | -0.97878 | -0.23425 |

|   |          |          |          |
|---|----------|----------|----------|
| C | -6.54506 | -2.50815 | -0.95934 |
| C | -5.57437 | -0.3314  | -0.44102 |
| C | -4.21272 | -2.37311 | -0.40416 |
| C | -5.32283 | -3.14095 | -0.76736 |
| C | -6.6634  | -1.11732 | -0.80136 |
| H | -5.67253 | 0.74416  | -0.33589 |
| H | -5.22784 | -4.21449 | -0.90239 |
| H | -7.62483 | -0.64174 | -0.96779 |
| H | -7.41647 | -3.09001 | -1.24068 |

***m*-DMAC-DPS-DMAC**

|   |          |          |          |
|---|----------|----------|----------|
| S | 0.44158  | 4.08601  | 0.63037  |
| O | 0.58111  | 5.47677  | 0.28068  |
| O | 0.25568  | 3.68213  | 2.00068  |
| C | 1.8629   | 3.22527  | 0.00414  |
| C | 4.07731  | 1.85316  | -0.92792 |
| C | 2.84866  | 3.92388  | -0.68435 |
| C | 1.95584  | 1.8531   | 0.2224   |
| C | 3.05872  | 1.16055  | -0.26444 |
| C | 3.96805  | 3.22576  | -1.14059 |
| H | 2.74022  | 4.99181  | -0.84126 |
| H | 1.18971  | 1.31212  | 0.76979  |
| H | 4.75944  | 3.75612  | -1.65942 |
| H | 4.95094  | 1.30651  | -1.27177 |
| C | -0.89434 | 3.39977  | -0.30902 |
| C | -2.86215 | 2.21605  | -1.84559 |
| C | -1.44133 | 2.18756  | 0.10809  |
| C | -1.32148 | 4.03858  | -1.46974 |
| C | -2.32731 | 3.44384  | -2.23095 |
| C | -2.41282 | 1.58531  | -0.68363 |
| H | -1.1196  | 1.71262  | 1.03065  |
| H | -0.87733 | 4.98584  | -1.75831 |
| H | -2.68449 | 3.93228  | -3.13132 |
| H | -3.62738 | 1.72797  | -2.44225 |
| N | 3.11676  | -0.24432 | -0.03402 |
| N | -2.91774 | 0.30016  | -0.32498 |
| C | 2.92147  | -1.16323 | -1.08354 |
| C | 2.70694  | -3.08207 | -3.10748 |
| C | 2.61563  | -2.49728 | -0.74475 |
| C | 3.04162  | -0.78913 | -2.42802 |
| C | 2.93393  | -1.74801 | -3.43233 |
| C | 2.54238  | -3.44013 | -1.76938 |
| H | 3.23547  | 0.24314  | -2.69451 |
| H | 3.03888  | -1.44441 | -4.46941 |
| H | 2.32887  | -4.47569 | -1.52728 |
| H | 2.63632  | -3.83557 | -3.88516 |
| C | 3.58544  | -0.71584 | 1.20945  |
| C | 4.61361  | -1.73397 | 3.59649  |
| C | 4.34906  | 0.10138  | 2.051    |
| C | 3.28908  | -2.04081 | 1.57847  |
| C | 3.83482  | -2.53624 | 2.76239  |
| C | 4.8522   | -0.40868 | 3.24434  |
| H | 4.5581   | 1.1282   | 1.77039  |
| H | 3.63461  | -3.56104 | 3.05668  |
| H | 5.44405  | 0.23301  | 3.88945  |
| H | 5.01569  | -2.13948 | 4.519    |
| C | -2.30172 | -0.83546 | -0.87454 |

|                      |          |          |          |                      |          |          |          |
|----------------------|----------|----------|----------|----------------------|----------|----------|----------|
| C                    | -1.06095 | -3.07306 | -2.03241 | H                    | 3.15843  | 1.10947  | 2.93602  |
| C                    | -1.1532  | -0.69194 | -1.67582 | N                    | -4.18663 | 0.4851   | -0.58958 |
| C                    | -2.82501 | -2.11758 | -0.63266 | N                    | 4.18659  | 0.4849   | 0.58946  |
| C                    | -2.18636 | -3.21119 | -1.22793 | C                    | -4.11297 | 1.43214  | 0.45439  |
| C                    | -0.54086 | -1.7989  | -2.2459  | C                    | -4.10749 | 3.34851  | 2.50833  |
| H                    | -0.73021 | 0.29114  | -1.85109 | C                    | -2.91995 | 2.02919  | 0.86495  |
| H                    | -2.58374 | -4.20693 | -1.05094 | C                    | -5.30337 | 1.81514  | 1.08983  |
| H                    | 0.3542   | -1.663   | -2.84485 | C                    | -5.30515 | 2.75176  | 2.10896  |
| H                    | -0.58517 | -3.94418 | -2.47169 | C                    | -2.92066 | 2.98626  | 1.88235  |
| C                    | -4.0613  | 0.20703  | 0.48105  | H                    | -1.98859 | 1.7558   | 0.38074  |
| C                    | -6.33835 | 0.07399  | 2.11516  | H                    | -6.25325 | 3.0089   | 2.56972  |
| C                    | -4.6215  | -1.04641 | 0.7805   | H                    | -1.98242 | 3.44375  | 2.17869  |
| C                    | -4.64612 | 1.37644  | 0.99866  | H                    | -4.11131 | 4.08902  | 3.30079  |
| C                    | -5.77269 | 1.30846  | 1.80683  | C                    | -5.3337  | -0.33732 | -0.63795 |
| C                    | -5.75501 | -1.07788 | 1.59864  | C                    | -7.69355 | -1.85514 | -0.71196 |
| H                    | -4.21333 | 2.34375  | 0.77153  | C                    | -5.37786 | -1.5433  | -1.33762 |
| H                    | -6.20227 | 2.22614  | 2.19618  | C                    | -6.49056 | 0.09349  | 0.02636  |
| H                    | -6.19717 | -2.04028 | 1.84109  | C                    | -7.65517 | -0.65421 | -0.00036 |
| H                    | -7.21728 | 0.00754  | 2.7474   | C                    | -6.55535 | -2.29331 | -1.37845 |
| C                    | -4.04255 | -2.35945 | 0.25669  | H                    | -4.49449 | -1.89421 | -1.85983 |
| C                    | 2.29327  | -2.80435 | 0.71417  | H                    | -8.52246 | -0.27676 | 0.5313   |
| C                    | 2.29237  | -4.30487 | 1.00597  | H                    | -6.56928 | -3.22423 | -1.93509 |
| H                    | 2.01921  | -4.48888 | 2.04819  | H                    | -8.60832 | -2.43693 | -0.73931 |
| H                    | 3.26969  | -4.75937 | 0.81312  | C                    | 5.33372  | -0.33741 | 0.63796  |
| H                    | 1.54157  | -4.80927 | 0.39158  | C                    | 7.69369  | -1.85504 | 0.71228  |
| C                    | 0.87875  | -2.25337 | 1.03008  | C                    | 6.4906   | 0.09346  | -0.02627 |
| H                    | 0.81158  | -1.1836  | 0.80959  | C                    | 5.37791  | -1.54335 | 1.33769  |
| H                    | 0.65592  | -2.40502 | 2.09168  | C                    | 6.55546  | -2.29327 | 1.37868  |
| H                    | 0.12519  | -2.7686  | 0.42539  | C                    | 7.65527  | -0.65415 | 0.00061  |
| C                    | -5.12713 | -3.09916 | -0.5558  | H                    | 4.49451  | -1.89431 | 1.85982  |
| H                    | -6.00536 | -3.30615 | 0.06224  | H                    | 6.56941  | -3.22417 | 1.93536  |
| H                    | -4.75074 | -4.05553 | -0.92938 | H                    | 8.52258  | -0.27665 | -0.53099 |
| H                    | -5.44223 | -2.49488 | -1.41147 | H                    | 8.6085   | -2.43674 | 0.73975  |
| C                    | -3.61433 | -3.23381 | 1.45545  | C                    | 4.11298  | 1.43206  | -0.45439 |
| H                    | -4.46584 | -3.44209 | 2.11026  | C                    | 4.10755  | 3.3487   | -2.50808 |
| H                    | -2.84273 | -2.72524 | 2.04136  | C                    | 2.91998  | 2.02918  | -0.86489 |
| H                    | -3.21084 | -4.19104 | 1.11159  | C                    | 5.3034   | 1.81512  | -1.08976 |
| <b>m-PXZ-DPS-PXZ</b> |          |          |          | C                    | 5.3052   | 2.75189  | -2.10877 |
| S                    | -0.00007 | -2.49599 | -0.00014 | C                    | 2.92071  | 2.98638  | -1.88217 |
| O                    | 0.85641  | -3.20331 | -0.91697 | H                    | 1.98861  | 1.75574  | -0.38073 |
| O                    | -0.85659 | -3.20334 | 0.91663  | H                    | 6.25331  | 3.00907  | -2.56947 |
| C                    | -1.01172 | -1.39312 | -0.94968 | H                    | 1.98248  | 3.44391  | -2.17847 |
| C                    | -2.54212 | 0.40321  | -2.38894 | H                    | 4.11141  | 4.08931  | -3.30044 |
| C                    | -2.20317 | -0.93225 | -0.40046 | O                    | -6.51716 | 1.30469  | 0.68485  |
| C                    | -0.57187 | -0.98218 | -2.20761 | O                    | 6.51719  | 1.30458  | -0.68489 |
| C                    | -1.34954 | -0.08086 | -2.92905 | H                    | -3.15839 | 1.10982  | -2.93608 |
| C                    | -2.96574 | -0.02147 | -1.13092 | <b>m-PTZ-DPS-PTZ</b> |          |          |          |
| H                    | -2.53934 | -1.27802 | 0.57357  | S                    | -0.11186 | -2.84913 | 0.14179  |
| H                    | 0.3554   | -1.37671 | -2.61044 | O                    | 0.71035  | -3.58068 | 1.07034  |
| H                    | -1.02762 | 0.24514  | -3.91215 | O                    | -0.91993 | -3.53135 | -0.83654 |
| C                    | 1.01161  | -1.39322 | 0.94947  | C                    | -1.17367 | -1.78282 | 1.07624  |
| C                    | 2.54211  | 0.40293  | 2.38885  | C                    | -2.75457 | 0.00847  | 2.46293  |
| C                    | 0.5718   | -0.98235 | 2.20743  | C                    | -2.2689  | -1.21297 | 0.43569  |
| C                    | 2.20309  | -0.93237 | 0.40027  | C                    | -0.85687 | -1.48592 | 2.40035  |
| C                    | 2.9657   | -0.02167 | 1.13078  | C                    | -1.66499 | -0.59028 | 3.09619  |
| C                    | 1.34952  | -0.08112 | 2.92894  | C                    | -3.05353 | -0.29895 | 1.13625  |
| H                    | -0.35549 | -1.37686 | 2.61024  | H                    | -2.50792 | -1.46991 | -0.59332 |
| H                    | 2.53923  | -1.27809 | -0.57378 | H                    | 0.0007   | -1.95875 | 2.86771  |
| H                    | 1.02762  | 0.24482  | 3.91206  | H                    | -1.4418  | -0.35195 | 4.13055  |

|                      |          |          |          |   |          |          |          |
|----------------------|----------|----------|----------|---|----------|----------|----------|
| H                    | -3.3847  | 0.72069  | 2.98638  | C | -0.86261 | 2.72243  | -0.06862 |
| C                    | 0.92266  | -1.69912 | -0.72606 | C | -2.61608 | 1.29266  | -1.63389 |
| C                    | 2.4697   | 0.17966  | -2.03209 | C | -1.52763 | 1.63857  | 0.49055  |
| C                    | 2.10148  | -1.26183 | -0.12584 | C | -1.05989 | 3.13355  | -1.38368 |
| C                    | 0.50724  | -1.22409 | -1.9673  | C | -1.96108 | 2.40341  | -2.1568  |
| C                    | 1.2927   | -0.27592 | -2.62126 | C | -2.4139  | 0.89377  | -0.30134 |
| C                    | 2.87724  | -0.31747 | -0.7901  | H | -1.34842 | 1.379    | 1.5287   |
| H                    | 2.42103  | -1.65427 | 0.83484  | H | -0.52561 | 3.99042  | -1.78022 |
| H                    | -0.40722 | -1.60222 | -2.41332 | H | -2.14443 | 2.68942  | -3.18766 |
| H                    | 0.98693  | 0.10386  | -3.59037 | H | -3.29289 | 0.72178  | -2.26158 |
| H                    | 3.08903  | 0.92015  | -2.53161 | C | 1.86335  | 2.74643  | 0.29217  |
| N                    | -4.16334 | 0.34714  | 0.50468  | C | 4.08799  | 1.51005  | -0.77313 |
| C                    | -3.87069 | 1.38437  | -0.41882 | C | 2.91788  | 3.53707  | -0.14825 |
| C                    | -3.35794 | 3.47008  | -2.24676 | C | 1.90327  | 1.3572   | 0.23627  |
| C                    | -2.5654  | 1.66106  | -0.84589 | C | 3.00521  | 0.72767  | -0.34243 |
| C                    | -4.91297 | 2.19085  | -0.90625 | C | 4.04873  | 2.89523  | -0.65664 |
| C                    | -4.66005 | 3.20147  | -1.83048 | H | 2.84367  | 4.61769  | -0.09898 |
| C                    | -2.31538 | 2.70119  | -1.74045 | H | 1.06797  | 0.76296  | 0.59694  |
| H                    | -1.73183 | 1.07873  | -0.47123 | H | 4.89347  | 3.48385  | -0.99928 |
| H                    | -5.4928  | 3.79081  | -2.20278 | H | 4.9526   | 1.02234  | -1.21272 |
| H                    | -1.29184 | 2.89864  | -2.04373 | N | -3.06988 | -0.22817 | 0.22391  |
| H                    | -3.16601 | 4.27105  | -2.95241 | N | 3.01078  | -0.6748  | -0.51131 |
| C                    | -5.37037 | -0.39089 | 0.38647  | C | -2.50759 | -0.9537  | 1.31305  |
| C                    | -7.79565 | -1.80085 | 0.13497  | C | -1.41246 | -2.38748 | 3.45202  |
| C                    | -6.54297 | 0.26055  | -0.02901 | C | -1.1613  | -1.33128 | 1.29065  |
| C                    | -5.44056 | -1.7549  | 0.69345  | C | -3.30574 | -1.30308 | 2.40654  |
| C                    | -6.64623 | -2.4458  | 0.57983  | C | -2.75888 | -2.02454 | 3.46517  |
| C                    | -7.73411 | -0.44464 | -0.1785  | C | -0.61757 | -2.03492 | 2.36092  |
| H                    | -4.55854 | -2.28439 | 1.03333  | H | -0.5498  | -1.08225 | 0.42782  |
| H                    | -6.67301 | -3.50044 | 0.8339   | H | -4.35153 | -1.01034 | 2.41941  |
| H                    | -8.61783 | 0.08483  | -0.5222  | H | -3.38645 | -2.29152 | 4.3097   |
| H                    | -8.73109 | -2.34048 | 0.03449  | H | 0.42982  | -2.32139 | 2.32836  |
| S                    | -6.53736 | 2.00852  | -0.24885 | H | -0.98674 | -2.941   | 4.28267  |
| N                    | 4.08819  | 0.12963  | -0.17186 | C | -4.35101 | -0.61147 | -0.25815 |
| C                    | 4.05358  | 1.37279  | 0.50915  | C | -6.87605 | -1.39075 | -1.17975 |
| C                    | 4.03455  | 3.82746  | 1.895    | C | -5.35184 | 0.34453  | -0.46079 |
| C                    | 5.13534  | 1.75126  | 1.32215  | C | -4.62133 | -1.95998 | -0.51221 |
| C                    | 2.95527  | 2.23755  | 0.42287  | C | -5.88131 | -2.34445 | -0.96329 |
| C                    | 2.94425  | 3.44489  | 1.12041  | C | -6.60374 | -0.04587 | -0.92879 |
| C                    | 5.13471  | 2.97692  | 1.98259  | H | -5.14404 | 1.38937  | -0.24899 |
| H                    | 2.09483  | 1.96663  | -0.17733 | H | -3.84199 | -2.69822 | -0.34618 |
| H                    | 2.07345  | 4.08838  | 1.04553  | H | -6.08242 | -3.39384 | -1.1554  |
| H                    | 5.99613  | 3.24775  | 2.58595  | H | -7.37315 | 0.70437  | -1.08232 |
| H                    | 4.0319   | 4.77108  | 2.42967  | H | -7.85501 | -1.6935  | -1.53655 |
| C                    | 5.31187  | -0.38266 | -0.6746  | C | 1.8476   | -1.34581 | -0.95935 |
| C                    | 7.77138  | -1.37835 | -1.62528 | C | -0.45221 | -2.70128 | -1.85031 |
| C                    | 5.37283  | -1.14092 | -1.85013 | C | 1.59376  | -2.66424 | -0.55428 |
| C                    | 6.50401  | -0.15558 | 0.03247  | C | 0.93112  | -0.71196 | -1.81423 |
| C                    | 7.72152  | -0.62457 | -0.45456 | C | -0.20927 | -1.38577 | -2.24429 |
| C                    | 6.5899   | -1.64194 | -2.3102  | C | 0.45992  | -3.33358 | -1.00635 |
| H                    | 4.46894  | -1.36222 | -2.40426 | H | 2.28918  | -3.16182 | 0.1145   |
| H                    | 8.62697  | -0.41189 | 0.10608  | H | 1.10682  | 0.30963  | -2.13833 |
| H                    | 6.60361  | -2.23803 | -3.2168  | H | -0.90984 | -0.87161 | -2.89556 |
| H                    | 8.7201   | -1.75798 | -1.9887  | H | 0.28058  | -4.3518  | -0.67464 |
| S                    | 6.4493   | 0.61561  | 1.61575  | H | -1.34238 | -3.22123 | -2.18874 |
| <b>m-DPA-DPS-DPA</b> |          |          |          | C | 4.21316  | -1.39079 | -0.26266 |
| S                    | 0.38519  | 3.51874  | 0.90491  | C | 6.59913  | -2.76456 | 0.24201  |
| O                    | 0.44712  | 4.91521  | 0.55274  | C | 4.66674  | -2.36389 | -1.15938 |
| O                    | 0.19296  | 3.128    | 2.27957  | C | 4.95909  | -1.10869 | 0.88646  |
|                      |          |          |          | C | 6.15043  | -1.78684 | 1.12929  |

C 5.84954 -3.05123 -0.8992  
 H 4.08842 -2.57935 -2.05294  
 H 4.60125 -0.35586 1.58278  
 H 6.72171 -1.55723 2.02327  
 H 6.19281 -3.80562 -1.60039  
 H 7.52384 -3.29758 0.4371

**p-Cz-DPS-Cz**

S 0.0001 -3.23095 1.08678  
 O 0.00012 -3.51047 2.50076  
 O 0.00014 -4.29869 0.11821  
 C -1.39539 -2.19968 0.74346  
 C -3.55232 -0.55984 0.19095  
 C -1.92514 -2.1826 -0.54525  
 C -1.93145 -1.41409 1.76204  
 C -3.0213 -0.59758 1.48501  
 C -3.00342 -1.35153 -0.82365  
 H -1.49543 -2.81501 -1.31538  
 H -1.51804 -1.472 2.76381  
 H -3.48094 -0.00461 2.26916  
 H -3.41942 -1.3024 -1.82478  
 C 1.3955 -2.19957 0.74341  
 C 3.55231 -0.5596 0.19083  
 C 1.92588 -2.18325 -0.54503  
 C 1.93086 -1.41312 1.76171  
 C 3.02063 -0.59655 1.48466  
 C 3.00411 -1.35212 -0.82348  
 H 1.49671 -2.81634 -1.31491  
 H 1.51699 -1.47043 2.76333  
 H 3.42059 -1.30361 -1.82444  
 N -4.6516 0.27763 -0.09081  
 C -5.83394 -0.11192 -0.7241  
 C -8.34163 -0.38155 -1.87106  
 C -6.2278 -1.37666 -1.16819  
 C -6.68635 1.00836 -0.82732  
 C -7.94925 0.86862 -1.40959  
 C -7.48845 -1.49 -1.74409  
 H -5.58449 -2.24358 -1.06202  
 H -8.61347 1.72385 -1.49312  
 H -7.81993 -2.46075 -2.09879  
 H -9.31823 -0.50812 -2.3264  
 C -4.73619 1.63818 0.21132  
 C -5.36918 4.31517 0.54195  
 C -5.98395 2.12763 -0.23173  
 C -3.78662 2.47674 0.80019  
 C -4.1247 3.81595 0.96023  
 C -6.30029 3.47787 -0.05979  
 H -2.81745 2.10573 1.11585  
 H -3.40618 4.49023 1.41553  
 H -7.25712 3.86503 -0.39756  
 H -5.59882 5.36586 0.68467  
 H 3.47974 -0.00292 2.26862  
 N 4.65158 0.27791 -0.0909  
 C 5.83429 -0.11181 -0.72341  
 C 8.34257 -0.38165 -1.86904  
 C 6.68652 1.00857 -0.82694  
 C 6.22862 -1.37674 -1.16651  
 C 7.48956 -1.49019 -1.74176  
 C 7.94972 0.86873 -1.40854  
 H 5.58545 -2.24374 -1.06009  
 H 7.8214 -2.46109 -2.09571

H 8.61381 1.72404 -1.4923  
 H 9.3194 -0.50829 -2.32386  
 C 4.73574 1.63867 0.21038  
 C 5.36806 4.316 0.53961  
 C 3.78573 2.47743 0.79825  
 C 5.98361 2.12809 -0.2324  
 C 6.29962 3.47849 -0.06116  
 C 4.12348 3.81681 0.9576  
 H 2.81647 2.10645 1.11367  
 H 7.25653 3.86562 -0.39872  
 H 3.40462 4.49125 1.41213  
 H 5.59744 5.36683 0.68178

**p-DMAC-DPS-DMAC**

S 0. 3.64675 0.00001  
 O 0.00639 4.35575 -1.25415  
 O -0.00639 4.35574 1.25417  
 C 1.39503 2.55405 0.0098  
 C 3.53825 0.81898 0.02474  
 C 1.96328 2.19188 1.22933  
 C 1.88257 2.07029 -1.2034  
 C 2.9632 1.19417 -1.19063  
 C 3.0464 1.3174 1.23139  
 H 1.57118 2.60475 2.15292  
 H 1.43025 2.38996 -2.13662  
 H 3.37421 0.79972 -2.11469  
 H 3.52083 1.01755 2.1606  
 C -1.39503 2.55405 -0.00978  
 C -3.53825 0.81898 -0.02474  
 C -1.88257 2.07028 1.20342  
 C -1.96328 2.19189 -1.22931  
 C -3.0464 1.3174 -1.23138  
 C -2.96321 1.19417 1.19064  
 H -1.43026 2.38995 2.13664  
 H -1.57118 2.60476 -2.1529  
 H -3.37422 0.79972 2.1147  
 N 4.64684 -0.08024 0.03248  
 C 4.40444 -1.45789 0.13072  
 C 5.94631 0.4403 -0.06372  
 C 5.47345 -2.3711 0.13908  
 C 7.0595 -0.4181 -0.06339  
 C 6.93477 -1.93678 0.04245  
 C 7.57013 -2.58282 -1.20781  
 C 7.68629 -2.41621 1.30335  
 C 3.0824 -1.93091 0.22117  
 H 2.25573 -1.23044 0.21378  
 C 2.81929 -3.2904 0.32122  
 H 1.78995 -3.62815 0.3915  
 C 3.86759 -4.20688 0.33237  
 H 3.67601 -5.27157 0.4107  
 C 5.17173 -3.73263 0.24091  
 H 5.98832 -4.44903 0.24927  
 H 7.51497 -3.67374 -1.15287  
 H 8.62439 -2.30544 -1.29595  
 H 7.05069 -2.25617 -2.11327  
 H 8.74284 -2.13754 1.25586  
 H 7.2514 -1.96819 2.20142  
 H 7.63104 -3.50433 1.39904  
 C 6.13677 1.83081 -0.15928  
 H 5.28177 2.49637 -0.15787



|                      |          |          |          |                      |          |          |          |
|----------------------|----------|----------|----------|----------------------|----------|----------|----------|
| C                    | 7.41345  | 2.36765  | -0.25544 | H                    | -3.46427 | -0.56376 | 1.90191  |
| H                    | 7.53204  | 3.4441   | -0.32793 | H                    | -3.3998  | -0.7679  | -2.3773  |
| C                    | 8.52606  | 1.53013  | -0.25797 | N                    | 4.64741  | 0.29076  | -0.36538 |
| H                    | 9.52883  | 1.93668  | -0.3325  | C                    | 4.39162  | 1.67469  | -0.26543 |
| C                    | 8.33038  | 0.15672  | -0.16189 | C                    | 4.00921  | 4.45395  | -0.1198  |
| H                    | 9.19969  | -0.49475 | -0.16264 | C                    | 5.48333  | 2.55165  | -0.18112 |
| N                    | -4.64684 | -0.08024 | -0.03248 | C                    | 3.10508  | 2.21567  | -0.27596 |
| H                    | -3.52083 | 1.01756  | -2.16059 | C                    | 2.91774  | 3.59831  | -0.20958 |
| C                    | -5.94631 | 0.4403   | 0.06372  | C                    | 5.30014  | 3.92123  | -0.10038 |
| C                    | -4.40444 | -1.45789 | -0.13072 | H                    | 2.24704  | 1.55632  | -0.34707 |
| C                    | -7.0595  | -0.41811 | 0.06338  | H                    | 1.90874  | 3.99665  | -0.2286  |
| C                    | -5.47345 | -2.3711  | -0.13909 | H                    | 6.17865  | 4.55438  | -0.03455 |
| C                    | -6.93477 | -1.93678 | -0.04246 | H                    | 3.86754  | 5.5277   | -0.06636 |
| C                    | -3.08239 | -1.93091 | -0.22116 | C                    | 5.91991  | -0.1682  | 0.03761  |
| H                    | -2.25573 | -1.23044 | -0.21376 | C                    | 8.50868  | -0.97161 | 0.77258  |
| C                    | -5.17172 | -3.73263 | -0.2409  | C                    | 6.19117  | -1.50553 | 0.32981  |
| H                    | -5.98832 | -4.44903 | -0.24925 | C                    | 6.96982  | 0.75849  | 0.11558  |
| C                    | -2.81928 | -3.2904  | -0.32119 | C                    | 8.24546  | 0.36965  | 0.48613  |
| H                    | -1.78994 | -3.62815 | -0.39147 | C                    | 7.48068  | -1.90338 | 0.69013  |
| C                    | -3.86758 | -4.20689 | -0.33235 | H                    | 5.39697  | -2.24114 | 0.26578  |
| H                    | -3.676   | -5.27157 | -0.41067 | H                    | 9.02068  | 1.12718  | 0.53342  |
| C                    | -6.13677 | 1.8308   | 0.15927  | H                    | 7.66963  | -2.94959 | 0.90554  |
| H                    | -5.28177 | 2.49637  | 0.15787  | H                    | 9.51037  | -1.27693 | 1.05414  |
| C                    | -8.33038 | 0.15672  | 0.16185  | O                    | 6.77683  | 2.08004  | -0.2246  |
| H                    | -9.1997  | -0.49476 | 0.16259  | N                    | -4.62277 | 0.33116  | -0.31997 |
| C                    | -7.41345 | 2.36764  | 0.25541  | C                    | -4.3798  | 1.70106  | -0.08608 |
| H                    | -7.53204 | 3.44409  | 0.32789  | C                    | -4.0212  | 4.45758  | 0.31984  |
| C                    | -8.52606 | 1.53013  | 0.25793  | C                    | -3.0979  | 2.24053  | 0.02952  |
| H                    | -9.52884 | 1.93668  | 0.33244  | C                    | -5.47896 | 2.56825  | 0.00282  |
| C                    | -7.57013 | -2.58282 | 1.20779  | C                    | -5.30808 | 3.92584  | 0.21183  |
| C                    | -7.68629 | -2.4162  | -1.30337 | C                    | -2.92201 | 3.61238  | 0.22547  |
| H                    | -7.0507  | -2.25617 | 2.11325  | H                    | -2.23371 | 1.58958  | -0.04398 |
| H                    | -8.62439 | -2.30545 | 1.29593  | H                    | -6.19218 | 4.55138  | 0.27555  |
| H                    | -7.51496 | -3.67375 | 1.15285  | H                    | -1.91584 | 4.01031  | 0.30511  |
| H                    | -8.74284 | -2.13751 | -1.25588 | H                    | -3.88844 | 5.52266  | 0.47435  |
| H                    | -7.63107 | -3.50432 | -1.39905 | C                    | -5.91533 | -0.15951 | -0.03515 |
| H                    | -7.25139 | -1.9682  | -2.20144 | C                    | -8.54012 | -1.01985 | 0.47142  |
| <b>p-PXZ-DPS-PXZ</b> |          |          |          | C                    | -6.97265 | 0.75778  | 0.05271  |
| S                    | -0.00247 | -3.41992 | -0.05144 | C                    | -6.1967  | -1.51591 | 0.13286  |
| O                    | -0.00116 | -4.03145 | 1.253    | C                    | -7.50401 | -1.94167 | 0.37925  |
| O                    | -0.00977 | -4.22047 | -1.24893 | C                    | -8.26673 | 0.34025  | 0.31081  |
| C                    | 1.39632  | -2.33514 | -0.13944 | H                    | -5.39592 | -2.24363 | 0.0611   |
| C                    | 3.54043  | -0.60925 | -0.28096 | H                    | -7.70033 | -3.00177 | 0.49873  |
| C                    | 1.8977   | -1.78173 | 1.03913  | H                    | -9.04727 | 1.09135  | 0.37112  |
| C                    | 1.95131  | -2.04751 | -1.38323 | H                    | -9.55572 | -1.3472  | 0.66443  |
| C                    | 3.03649  | -1.17558 | -1.44959 | O                    | -6.76452 | 2.10271  | -0.16525 |
| C                    | 2.97842  | -0.91113 | 0.96298  | <b>p-PTZ-DPS-PTZ</b> |          |          |          |
| H                    | 1.45487  | -2.0453  | 1.99414  | S                    | 0.00147  | -3.41109 | 0.04852  |
| H                    | 1.54879  | -2.5134  | -2.27662 | O                    | 0.00888  | -4.07291 | -1.23175 |
| H                    | 3.50174  | -0.9302  | -2.39858 | O                    | -0.01113 | -4.1655  | 1.27547  |
| H                    | 3.3984   | -0.46423 | 1.8594   | C                    | 1.40174  | -2.32698 | 0.10358  |
| C                    | -1.39197 | -2.32222 | -0.127   | C                    | 3.57489  | -0.6286  | 0.18759  |
| C                    | -3.52082 | -0.57599 | -0.24687 | C                    | 1.99907  | -2.0529  | 1.32981  |
| C                    | -1.89711 | -1.95667 | -1.37201 | C                    | 1.87216  | -1.76972 | -1.08619 |
| C                    | -1.93606 | -1.83723 | 1.0622   | C                    | 2.96602  | -0.91433 | -1.03908 |
| C                    | -3.01062 | -0.9574  | 0.99698  | C                    | 3.09741  | -1.19553 | 1.36644  |
| C                    | -2.9734  | -1.0738  | -1.42766 | H                    | 1.61957  | -2.51881 | 2.2333   |
| H                    | -1.46347 | -2.37024 | -2.27665 | H                    | 1.39755  | -2.02221 | -2.02918 |
| H                    | -1.5308  | -2.16152 | 2.01507  | H                    | 3.3635   | -0.47171 | -1.94823 |

|                      |          |          |          |   |          |          |          |
|----------------------|----------|----------|----------|---|----------|----------|----------|
| H                    | 3.59744  | -0.96542 | 2.30155  | C | -1.39407 | -2.21091 | -0.07453 |
| C                    | -1.3909  | -2.31589 | 0.07252  | C | -3.56813 | -0.46465 | -0.18844 |
| C                    | -3.54832 | -0.59694 | 0.1123   | C | -1.86028 | -1.76855 | -1.3124  |
| C                    | -1.8537  | -1.83823 | 1.296    | C | -2.00445 | -1.7901  | 1.1063   |
| C                    | -1.99004 | -1.95509 | -1.13354 | C | -3.08257 | -0.91908 | 1.05093  |
| C                    | -3.08035 | -1.09249 | -1.10814 | C | -2.94368 | -0.9046  | -1.36972 |
| C                    | -2.94088 | -0.96817 | 1.31035  | H | -1.39239 | -2.12665 | -2.22413 |
| H                    | -1.37913 | -2.15674 | 2.21873  | H | -1.63419 | -2.14941 | 2.06131  |
| H                    | -1.61663 | -2.36475 | -2.06634 | H | -3.55759 | -0.58702 | 1.96774  |
| H                    | -3.58107 | -0.80361 | -2.02808 | H | -3.32273 | -0.57419 | -2.33076 |
| H                    | -3.33553 | -0.57881 | 2.24308  | C | 1.39401  | -2.21084 | 0.07459  |
| N                    | 4.71421  | 0.23645  | 0.25722  | C | 3.56801  | -0.46451 | 0.1884   |
| C                    | 5.96989  | -0.31663 | -0.10569 | C | 2.00431  | -1.79    | -1.10627 |
| C                    | 8.48864  | -1.37085 | -0.80359 | C | 1.86024  | -1.76846 | 1.31244  |
| C                    | 7.14748  | 0.41136  | 0.13184  | C | 2.94362  | -0.90447 | 1.36971  |
| C                    | 6.08181  | -1.59142 | -0.67442 | C | 3.08239  | -0.91894 | -1.05095 |
| C                    | 7.33081  | -2.11395 | -1.00677 | H | 1.63401  | -2.14932 | -2.06126 |
| C                    | 8.38789  | -0.10055 | -0.24014 | H | 1.39242  | -2.12659 | 2.22419  |
| H                    | 5.19674  | -2.191   | -0.84938 | H | 3.3227   | -0.57405 | 2.33073  |
| H                    | 7.38743  | -3.10934 | -1.43532 | H | 3.55738  | -0.58686 | -1.96777 |
| H                    | 9.27669  | 0.49729  | -0.06072 | N | -4.66265 | 0.40824  | -0.24705 |
| H                    | 9.45985  | -1.77155 | -1.07299 | N | 4.66254  | 0.40838  | 0.24695  |
| C                    | 4.48521  | 1.63201  | 0.15435  | C | -5.6792  | 0.37064  | 0.74718  |
| C                    | 4.08406  | 4.41683  | -0.02287 | C | -7.70024 | 0.31327  | 2.68172  |
| C                    | 3.22804  | 2.15736  | -0.16854 | C | -6.20616 | -0.85179 | 1.17721  |
| C                    | 5.53396  | 2.53041  | 0.41401  | C | -6.17195 | 1.56376  | 1.28515  |
| C                    | 5.33945  | 3.90425  | 0.2968   | C | -7.18319 | 1.53142  | 2.24175  |
| C                    | 3.03067  | 3.53567  | -0.24241 | C | -7.20426 | -0.87612 | 2.14721  |
| H                    | 2.39093  | 1.49408  | -0.34903 | H | -5.82911 | -1.77696 | 0.75125  |
| H                    | 6.17705  | 4.56979  | 0.48381  | H | -5.76329 | 2.51036  | 0.94409  |
| H                    | 2.04177  | 3.91345  | -0.48192 | H | -7.56039 | 2.46347  | 2.65096  |
| H                    | 3.93473  | 5.48888  | -0.09167 | H | -7.60453 | -1.82998 | 2.47641  |
| S                    | 7.07378  | 1.92939  | 1.02279  | H | -8.48413 | 0.29003  | 3.43176  |
| N                    | -4.68003 | 0.2793   | 0.16304  | C | -4.7828  | 1.3486   | -1.30758 |
| C                    | -4.49295 | 1.62389  | -0.24589 | C | -5.03406 | 3.21526  | -3.37717 |
| C                    | -4.17766 | 4.31252  | -1.03462 | C | -3.68508 | 2.12686  | -1.6898  |
| C                    | -3.29933 | 2.06635  | -0.82952 | C | -6.00788 | 1.51244  | -1.96125 |
| C                    | -5.5166  | 2.56323  | -0.03474 | C | -6.13079 | 2.44764  | -2.98566 |
| C                    | -5.36865 | 3.88315  | -0.45298 | C | -3.81155 | 3.04753  | -2.72645 |
| C                    | -3.14293 | 3.39937  | -1.20684 | H | -2.73723 | 2.00386  | -1.17393 |
| H                    | -2.47874 | 1.3759   | -0.98006 | H | -6.85849 | 0.90903  | -1.65838 |
| H                    | -6.18827 | 4.57785  | -0.29525 | H | -7.0869  | 2.56819  | -3.48541 |
| H                    | -2.20253 | 3.71475  | -1.64762 | H | -2.95299 | 3.6453   | -3.01628 |
| H                    | -4.0626  | 5.34662  | -1.34065 | H | -5.13192 | 3.93936  | -4.17926 |
| C                    | -5.96286 | -0.32414 | 0.08735  | C | 4.78284  | 1.34865  | 1.30753  |
| C                    | -8.53157 | -1.47627 | -0.03918 | C | 5.03437  | 3.21513  | 3.37725  |
| C                    | -7.11125 | 0.44471  | 0.33737  | C | 6.00798  | 1.51235  | 1.96113  |
| C                    | -6.12578 | -1.68355 | -0.2065  | C | 3.6852   | 2.12697  | 1.68988  |
| C                    | -7.39779 | -2.25218 | -0.25536 | C | 3.8118   | 3.04754  | 2.7266   |
| C                    | -8.38045 | -0.12122 | 0.24744  | C | 6.13102  | 2.44746  | 2.98562  |
| H                    | -5.26143 | -2.31137 | -0.38658 | H | 6.85853  | 0.90891  | 1.65817  |
| H                    | -7.49202 | -3.31099 | -0.47372 | H | 2.73731  | 2.00408  | 1.17407  |
| H                    | -9.24826 | 0.50655  | 0.42751  | H | 2.95331  | 3.64535  | 3.01654  |
| H                    | -9.52214 | -1.91521 | -0.08902 | H | 7.08717  | 2.56789  | 3.48532  |
| S                    | -6.94647 | 2.10985  | 0.88879  | H | 5.13234  | 3.93915  | 4.17941  |
|                      |          |          |          | C | 5.67911  | 0.37064  | -0.74727 |
|                      |          |          |          | C | 7.70018  | 0.31305  | -2.68176 |
|                      |          |          |          | C | 6.17201  | 1.56371  | -1.28522 |
|                      |          |          |          | C | 6.20595  | -0.85184 | -1.17728 |
|                      |          |          |          | C | 7.20407  | -0.87628 | -2.14726 |
| <b>p-DPA-DPS-DPA</b> |          |          |          |   |          |          |          |
| S                    | -0.00001 | -3.28589 | 0.00005  |   |          |          |          |
| O                    | -0.06752 | -4.00064 | 1.25259  |   |          |          |          |
| O                    | 0.06755  | -4.00068 | -1.25247 |   |          |          |          |

|   |         |          |          |
|---|---------|----------|----------|
| C | 7.18326 | 1.53126  | -2.2418  |
| H | 5.76344 | 2.51036  | -0.94415 |
| H | 5.82879 | -1.77697 | -0.75133 |
| H | 7.60423 | -1.83019 | -2.47646 |
| H | 7.56058 | 2.46328  | -2.651   |
| H | 8.48409 | 0.28973  | -3.43179 |

**TXO2-PXZ(NO)**

|   |           |           |           |
|---|-----------|-----------|-----------|
| C | -1.264974 | -0.999828 | -0.009747 |
| C | -3.631053 | -0.688572 | -1.559449 |
| C | -1.361746 | -1.441214 | -1.337306 |
| C | -2.408060 | -0.384989 | 0.515257  |
| C | -3.568037 | -0.239711 | -0.241407 |
| C | -2.508034 | -1.285697 | -2.114918 |
| H | -2.428044 | 0.006660  | 1.524652  |
| H | -2.502865 | -1.624437 | -3.145862 |
| H | -4.542469 | -0.556728 | -2.134505 |
| S | -0.000017 | -2.252288 | -2.108988 |
| O | 0.000014  | -3.646927 | -1.737240 |
| O | -0.000033 | -1.929899 | -3.513760 |
| C | 1.361692  | -1.441164 | -1.337324 |
| C | 3.567973  | -0.239627 | -0.241441 |
| C | 1.264925  | -0.999785 | -0.009764 |
| C | 2.507968  | -1.285617 | -2.114951 |
| C | 3.630981  | -0.688477 | -1.559487 |
| C | 2.408004  | -0.384922 | 0.515231  |
| H | 2.502793  | -1.624354 | -3.145895 |
| H | 4.542393  | -0.556618 | -2.134548 |
| H | 2.427994  | 0.006717  | 1.524629  |
| C | -0.000015 | -1.212719 | 0.836805  |
| C | -0.000026 | -0.289628 | 2.063132  |
| H | -0.870857 | -0.492938 | 2.688492  |
| H | -0.000021 | 0.769233  | 1.787036  |
| H | 0.870789  | -0.492943 | 2.688513  |
| C | 0.000015  | -2.672547 | 1.366939  |
| H | 0.000034  | -3.403546 | 0.558021  |
| H | -0.888665 | -2.830341 | 1.985429  |
| H | 0.888697  | -2.830303 | 1.985435  |
| N | -4.700552 | 0.391664  | 0.360291  |
| C | -5.008898 | 1.718193  | -0.007205 |
| C | -5.705705 | 4.368804  | -0.622129 |
| C | -6.201486 | 2.281929  | 0.470048  |
| C | -4.170151 | 2.507381  | -0.795392 |
| C | -4.516613 | 3.826927  | -1.095499 |
| C | -6.553948 | 3.584667  | 0.162954  |
| H | -3.239844 | 2.093889  | -1.168981 |
| H | -3.845976 | 4.423634  | -1.704539 |
| H | -7.488496 | 3.970942  | 0.555981  |
| H | -5.978339 | 5.392177  | -0.855061 |
| C | -5.759710 | -0.423453 | 0.812515  |
| C | -7.915573 | -1.936151 | 1.787948  |
| C | -5.686673 | -1.816430 | 0.854907  |
| C | -6.931772 | 0.198077  | 1.268032  |
| C | -8.000449 | -0.542761 | 1.741988  |
| C | -6.758210 | -2.566108 | 1.346013  |
| H | -4.788364 | -2.317552 | 0.511368  |
| H | -8.884379 | -0.012433 | 2.080311  |
| H | -6.676272 | -3.647353 | 1.376043  |
| H | -8.749887 | -2.515500 | 2.167645  |

|   |           |           |           |
|---|-----------|-----------|-----------|
| O | -7.036645 | 1.571743  | 1.305064  |
| N | 4.700511  | 0.391699  | 0.360271  |
| C | 5.759554  | -0.423517 | 0.812617  |
| C | 7.915179  | -1.936370 | 1.788323  |
| C | 5.686377  | -1.816483 | 0.855066  |
| C | 6.931639  | 0.197921  | 1.268198  |
| C | 8.000201  | -0.542993 | 1.742292  |
| C | 6.757796  | -2.566237 | 1.346312  |
| H | 4.788053  | -2.317542 | 0.511479  |
| H | 8.884153  | -0.012733 | 2.080666  |
| H | 6.675753  | -3.647472 | 1.376389  |
| H | 8.749398  | -2.515782 | 2.168135  |
| C | 5.009058  | 1.718146  | -0.007342 |
| C | 5.706247  | 4.368603  | -0.622474 |
| C | 6.201665  | 2.281784  | 0.469970  |
| C | 4.170480  | 2.507354  | -0.795692 |
| C | 4.517133  | 3.826823  | -1.095904 |
| C | 6.554319  | 3.584447  | 0.162772  |
| H | 3.240154  | 2.093931  | -1.169314 |
| H | 3.846630  | 4.423554  | -1.705066 |
| H | 7.488873  | 3.970653  | 0.555853  |
| H | 5.979028  | 5.391919  | -0.855486 |
| O | 7.036645  | 1.571581  | 1.305152  |

**DBTO-PXZ(NO)**

|   |          |          |          |
|---|----------|----------|----------|
| C | 0.74015  | 1.78723  | 0.00067  |
| C | 3.50269  | 2.21995  | 0.00041  |
| C | 1.28487  | 3.07486  | 0.00122  |
| C | 1.59968  | 0.69572  | -0.00003 |
| C | 2.9789   | 0.92729  | -0.00012 |
| C | 2.64556  | 3.32345  | 0.00109  |
| H | 1.22861  | -0.32551 | -0.00045 |
| H | 3.0355   | 4.33595  | 0.00155  |
| H | 4.57946  | 2.35059  | 0.00031  |
| S | 0.00004  | 4.296    | 0.00238  |
| O | 0.00044  | 5.03817  | 1.23804  |
| O | -0.00038 | 5.03983  | -1.23229 |
| C | -1.2848  | 3.07485  | 0.00198  |
| C | -2.97883 | 0.92728  | 0.00125  |
| C | -0.74008 | 1.78722  | 0.00106  |
| C | -2.64549 | 3.32345  | 0.00251  |
| C | -3.50262 | 2.21994  | 0.00217  |
| C | -1.59961 | 0.69572  | 0.00065  |
| H | -3.03543 | 4.33594  | 0.00321  |
| H | -4.57939 | 2.35058  | 0.0026   |
| H | -1.22854 | -0.32551 | -0.00009 |
| N | -3.87889 | -0.18359 | 0.00084  |
| N | 3.87897  | -0.18358 | -0.00067 |
| C | -4.06116 | -0.89468 | 1.20674  |
| C | -4.53482 | -2.37048 | 3.55006  |
| C | -4.79591 | -2.08904 | 1.17365  |
| C | -3.57102 | -0.45067 | 2.43603  |
| C | -3.81272 | -1.18345 | 3.60064  |
| C | -5.02485 | -2.82527 | 2.3235   |
| H | -3.00809 | 0.47476  | 2.48823  |
| H | -3.42835 | -0.81473 | 4.54564  |
| H | -5.59643 | -3.74401 | 2.24281  |
| H | -4.72193 | -2.94315 | 4.45167  |

|   |          |          |          |   |           |           |           |
|---|----------|----------|----------|---|-----------|-----------|-----------|
| C | -4.06344 | -0.89184 | -1.20639 | H | -0.870866 | -0.175450 | -2.382567 |
| C | -4.54145 | -2.36216 | -3.55227 | C | -0.000004 | -2.597705 | -1.582078 |
| C | -3.57549 | -0.44501 | -2.43553 | H | 0.000007  | -3.490435 | -0.956123 |
| C | -4.79815 | -2.08627 | -1.17473 | H | 0.888944  | -2.613937 | -2.219952 |
| C | -5.02923 | -2.81981 | -2.32587 | H | -0.888964 | -2.613946 | -2.219935 |
| C | -3.81937 | -1.17507 | -3.60141 | N | 4.709833  | 0.152476  | 0.085194  |
| H | -3.01258 | 0.4805   | -2.4866  | N | -4.709831 | 0.152480  | 0.085197  |
| H | -5.60069 | -3.73872 | -2.24627 | C | -4.853873 | 1.486481  | 0.493065  |
| H | -3.4367  | -0.80417 | -4.54624 | C | -5.099701 | 4.151994  | 1.340457  |
| H | -4.73024 | -2.93272 | -4.45486 | C | -3.892103 | 2.066138  | 1.340679  |
| C | 4.06225  | -0.89391 | 1.20554  | C | -5.953102 | 2.249271  | 0.061220  |
| C | 4.53782  | -2.36823 | 3.54941  | C | -6.046139 | 3.573001  | 0.502030  |
| C | 4.79689  | -2.08833 | 1.17259  | C | -4.015821 | 3.384239  | 1.758750  |
| C | 3.57317  | -0.44909 | 2.43496  | H | -3.044141 | 1.481078  | 1.676501  |
| C | 3.81582  | -1.18113 | 3.59984  | H | -6.891228 | 4.173429  | 0.177322  |
| C | 5.02677  | -2.82385 | 2.32272  | H | -3.260150 | 3.806127  | 2.413843  |
| H | 3.01033  | 0.4764   | 2.48704  | H | -5.208618 | 5.182621  | 1.660398  |
| H | 3.43227  | -0.81178 | 4.54492  | C | -5.635444 | -0.467447 | -0.767047 |
| H | 5.59822  | -3.74267 | 2.24213  | C | -7.461679 | -1.754045 | -2.467760 |
| H | 4.72566  | -2.94034 | 4.45122  | C | -5.441778 | -1.806323 | -1.153869 |
| C | 4.06238  | -0.89267 | -1.20759 | C | -6.756938 | 0.238714  | -1.235922 |
| C | 4.53824  | -2.36456 | -3.55291 | C | -7.647103 | -0.431162 | -2.081015 |
| C | 3.57339  | -0.44661 | -2.4366  | C | -6.346231 | -2.440570 | -1.994836 |
| C | 4.79704  | -2.08711 | -1.17578 | H | -4.580366 | -2.355178 | -0.792030 |
| C | 5.02707  | -2.82142 | -2.32664 | H | -8.518713 | 0.102150  | -2.449791 |
| C | 3.81619  | -1.17745 | -3.6022  | H | -6.173493 | -3.474554 | -2.276206 |
| H | 3.01051  | 0.47891  | -2.48778 | H | -8.176199 | -2.238053 | -3.124743 |
| H | 5.59855  | -3.74031 | -2.24694 | C | 4.853877  | 1.486474  | 0.493071  |
| H | 3.43272  | -0.80715 | -4.54694 | C | 5.099710  | 4.151980  | 1.340480  |
| H | 4.72621  | -2.93572 | -4.4553  | C | 3.892110  | 2.066127  | 1.340690  |
| O | -5.35865 | -2.54246 | -0.00054 | C | 5.953107  | 2.249265  | 0.061230  |
| O | 5.35857  | -2.54255 | -0.0018  | C | 6.046147  | 3.572992  | 0.502048  |

**TXO2-DMAC**

|   |           |           |           |   |           |           |           |
|---|-----------|-----------|-----------|---|-----------|-----------|-----------|
| C | 1.265602  | -1.274257 | 0.132421  | H | 3.044147  | 1.481065  | 1.676509  |
| C | 3.631647  | -1.311548 | 1.713316  | H | 6.891236  | 4.173421  | 0.177343  |
| C | 1.361467  | -1.996630 | 1.332377  | H | 3.260160  | 3.806109  | 2.413866  |
| C | 2.409524  | -0.564124 | -0.244919 | H | 5.208629  | 5.182605  | 1.660427  |
| C | 3.571782  | -0.588981 | 0.525628  | C | 5.635440  | -0.467446 | -0.767059 |
| C | 2.506390  | -2.015036 | 2.124897  | C | 7.461669  | -1.754035 | -2.467786 |
| H | 2.429345  | 0.037255  | -1.145865 | C | 6.756936  | 0.238715  | -1.235929 |
| H | 2.500146  | -2.570226 | 3.057285  | C | 5.441768  | -1.806317 | -1.153894 |
| H | 4.542832  | -1.306835 | 2.302593  | C | 6.346218  | -2.440559 | -1.994868 |
| S | 0.000000  | -2.958272 | 1.904529  | C | 7.647098  | -0.431156 | -2.081028 |
| O | -0.000004 | -4.235501 | 1.231583  | H | 4.580355  | -2.355172 | -0.792059 |
| O | 0.000003  | -2.957863 | 3.346040  | H | 6.173475  | -3.474540 | -2.276248 |
| C | -1.361466 | -1.996626 | 1.332383  | H | 8.518711  | 0.102156  | -2.449800 |
| C | -3.571780 | -0.588975 | 0.525633  | H | 8.176187  | -2.238040 | -3.124772 |
| C | -1.265603 | -1.274257 | 0.132425  | C | 7.038068  | 1.691890  | -0.858335 |
| C | -2.506386 | -2.015024 | 2.124906  | C | 8.399617  | 1.768893  | -0.134082 |
| C | -3.631643 | -1.311535 | 1.713325  | H | 8.639475  | 2.801823  | 0.133963  |
| C | -2.409524 | -0.564125 | -0.244917 | H | 9.202646  | 1.393910  | -0.775062 |
| H | -2.500141 | -2.570211 | 3.057296  | H | 8.380659  | 1.170267  | 0.781120  |
| H | -4.542825 | -1.306816 | 2.302606  | C | 7.094949  | 2.544523  | -2.144404 |
| H | -2.429346 | 0.037246  | -1.145870 | H | 7.315123  | 3.589619  | -1.909120 |
| C | -0.000003 | -1.293267 | -0.739589 | H | 6.138274  | 2.504041  | -2.673130 |
| C | -0.000013 | -0.118391 | -1.727596 | H | 7.876787  | 2.181829  | -2.817658 |
| H | 0.870784  | -0.175490 | -2.382636 | C | -7.038064 | 1.691893  | -0.858341 |
| H | 0.000029  | 0.851043  | -1.219860 | C | -8.399614 | 1.768906  | -0.134089 |
|   |           |           |           | H | -8.639469 | 2.801840  | 0.133946  |
|   |           |           |           | H | -8.380659 | 1.170288  | 0.781118  |

|   |           |          |           |
|---|-----------|----------|-----------|
| H | -9.202643 | 1.393920 | -0.775067 |
| C | -7.094941 | 2.544515 | -2.144417 |
| H | -7.315112 | 3.589614 | -1.909141 |
| H | -7.876780 | 2.181819 | -2.817669 |
| H | -6.138266 | 2.504025 | -2.673142 |

**DBTO-DMAC(ACR)**

|   |           |           |           |
|---|-----------|-----------|-----------|
| C | -0.740317 | 1.906416  | 0.000027  |
| C | -3.501234 | 2.338713  | 0.000058  |
| C | -1.283456 | 3.193163  | 0.000053  |
| C | -1.601532 | 0.813637  | 0.000011  |
| C | -2.978920 | 1.042643  | 0.000031  |
| C | -2.645554 | 3.440838  | 0.000068  |
| H | -1.234407 | -0.208504 | -0.000012 |
| H | -3.032672 | 4.454627  | 0.000086  |
| H | -4.578688 | 2.469356  | 0.000069  |
| S | -0.000000 | 4.417530  | 0.000078  |
| O | -0.000017 | 5.153707  | -1.236865 |
| O | 0.000017  | 5.153607  | 1.237081  |
| C | 1.283455  | 3.193163  | 0.000024  |
| C | 2.978919  | 1.042643  | -0.000020 |
| C | 0.740316  | 1.906416  | 0.000014  |
| C | 2.645553  | 3.440837  | 0.000010  |
| C | 3.501234  | 2.338712  | -0.000014 |
| C | 1.601531  | 0.813637  | -0.000005 |
| H | 3.032672  | 4.454626  | 0.000019  |
| H | 4.578688  | 2.469355  | -0.000025 |
| H | 1.234406  | -0.208504 | -0.000009 |
| N | 3.870157  | -0.071526 | -0.000038 |
| N | -3.870158 | -0.071526 | 0.000023  |
| C | 4.297778  | -0.600759 | -1.227270 |
| C | 5.124124  | -1.624605 | -3.706961 |
| C | 5.177933  | -1.696235 | -1.262190 |
| C | 3.842835  | -0.031706 | -2.430656 |
| C | 4.252730  | -0.539666 | -3.655996 |
| C | 5.569882  | -2.181957 | -2.513469 |
| H | 3.165330  | 0.813625  | -2.408800 |
| H | 3.886815  | -0.081448 | -4.569330 |
| H | 6.249626  | -3.028276 | -2.555422 |
| H | 5.452204  | -2.031027 | -4.657522 |
| C | 4.297832  | -0.600751 | 1.227178  |
| C | 5.124286  | -1.624577 | 3.706840  |
| C | 3.842951  | -0.031680 | 2.430579  |
| C | 5.177980  | -1.696233 | 1.262068  |
| C | 5.569984  | -2.181945 | 2.513333  |
| C | 4.252898  | -0.539632 | 3.655905  |
| H | 3.165453  | 0.813657  | 2.408746  |
| H | 6.249726  | -3.028267 | 2.555265  |
| H | 3.887035  | -0.081397 | 4.569252  |
| H | 5.452402  | -2.030997 | 4.657390  |
| C | -4.297729 | -0.600823 | 1.227245  |
| C | -5.123998 | -1.624778 | 3.706916  |
| C | -5.177875 | -1.696306 | 1.262144  |
| C | -3.842756 | -0.031817 | 2.430642  |
| C | -4.252610 | -0.539834 | 3.655972  |
| C | -5.569790 | -2.182080 | 2.513413  |
| H | -3.165264 | 0.813525  | 2.408803  |
| H | -3.886674 | -0.081650 | 4.569315  |
| H | -5.452050 | -2.031241 | 4.657469  |
| C | -4.297884 | -0.600685 | -1.227203 |

|   |           |           |           |
|---|-----------|-----------|-----------|
| C | -5.124416 | -1.624401 | -3.706884 |
| C | -3.843039 | -0.031563 | -2.430594 |
| C | -5.178036 | -1.696164 | -1.262114 |
| C | -5.570075 | -2.181824 | -2.513389 |
| C | -4.253028 | -0.539457 | -3.655929 |
| H | -3.165532 | 0.813767  | -2.408744 |
| H | -6.249810 | -3.028150 | -2.555336 |
| H | -3.887191 | -0.081185 | -4.569267 |
| H | -5.452561 | -2.030780 | -4.657442 |
| C | 5.715430  | -2.368181 | -0.000072 |
| C | 7.256899  | -2.278935 | -0.000098 |
| H | 7.675041  | -2.769218 | -0.883790 |
| H | 7.675066  | -2.769235 | 0.883574  |
| H | 7.579713  | -1.233899 | -0.000092 |
| C | 5.289687  | -3.852499 | -0.000073 |
| H | 5.676224  | -4.367924 | -0.883895 |
| H | 4.199262  | -3.938190 | -0.000045 |
| H | 5.676271  | -4.367946 | 0.883716  |
| H | -6.249537 | -3.028398 | 2.555350  |
| C | -5.715425 | -2.368184 | 0.000012  |
| C | -5.289674 | -3.852501 | -0.000101 |
| H | -5.676276 | -4.367886 | -0.883918 |
| H | -5.676187 | -4.367992 | 0.883693  |
| H | -4.199248 | -3.938186 | -0.000160 |
| C | -7.256894 | -2.278948 | 0.000117  |
| H | -7.675103 | -2.769210 | -0.883555 |
| H | -7.579715 | -1.233913 | 0.000176  |
| H | -7.674989 | -2.769274 | 0.883809  |

**Cz-TTR**

|   |          |          |          |
|---|----------|----------|----------|
| H | 0.93906  | -2.45085 | -2.08546 |
| C | 0.58437  | -1.6094  | -1.49997 |
| C | -0.2954  | 0.5392   | 0.06969  |
| C | 1.49434  | -0.68002 | -1.01222 |
| C | -0.77413 | -1.44248 | -1.24392 |
| C | -1.21774 | -0.37511 | -0.45868 |
| C | 1.0476   | 0.39276  | -0.23338 |
| H | -1.49407 | -2.14084 | -1.65672 |
| H | -0.62075 | 1.3368   | 0.73013  |
| S | 3.20922  | -0.88806 | -1.41102 |
| O | 3.44181  | -2.28467 | -1.666   |
| O | 3.57608  | 0.07714  | -2.41146 |
| S | 2.17731  | 1.60472  | 0.41217  |
| O | 2.57636  | 2.47297  | -0.66153 |
| O | 1.59286  | 2.17491  | 1.59606  |
| C | 3.56405  | 0.6108   | 0.89897  |
| C | 5.76897  | -0.87769 | 1.69477  |
| C | 4.0087   | -0.46044 | 0.11527  |
| C | 4.2082   | 0.92891  | 2.08694  |
| C | 5.32608  | 0.18711  | 2.47405  |
| C | 5.10081  | -1.21772 | 0.51651  |
| H | 3.8312   | 1.74057  | 2.69992  |
| H | 5.41403  | -2.06499 | -0.08408 |
| H | 6.62772  | -1.46094 | 2.00813  |
| H | 5.83854  | 0.43644  | 3.39658  |
| N | -2.58425 | -0.22148 | -0.17475 |
| C | -3.3127  | 0.96721  | -0.29959 |
| C | -5.18038 | 3.00896  | -0.4198  |
| C | -2.89886 | 2.21666  | -0.76717 |
| C | -4.64839 | 0.72317  | 0.08347  |

|   |          |          |          |
|---|----------|----------|----------|
| C | -5.58747 | 1.7567   | 0.02454  |
| C | -3.85089 | 3.22961  | -0.81584 |
| H | -1.88043 | 2.39998  | -1.09216 |
| H | -6.61828 | 1.58025  | 0.31677  |
| H | -3.55573 | 4.21119  | -1.17216 |
| H | -5.89524 | 3.82338  | -0.46986 |
| C | -3.44291 | -1.22457 | 0.28894  |
| C | -5.50532 | -2.80553 | 1.25     |
| C | -4.73099 | -0.67449 | 0.46158  |
| C | -3.16277 | -2.55343 | 0.61525  |
| C | -4.21254 | -3.33162 | 1.09248  |
| C | -5.7698  | -1.4762  | 0.94285  |
| H | -2.16674 | -2.97049 | 0.51476  |
| H | -4.02294 | -4.36831 | 1.3514   |
| H | -6.76465 | -1.06307 | 1.07954  |
| H | -6.30021 | -3.44257 | 1.62305  |

**DMAC-TTR (Planar)**

|   |          |          |          |
|---|----------|----------|----------|
| N | -2.26075 | -0.25742 | -0.69249 |
| C | -3.29207 | -1.1955  | -0.37404 |
| C | -5.37573 | -2.92322 | 0.22189  |
| C | -4.16089 | -0.86988 | 0.67701  |
| C | -3.47684 | -2.34384 | -1.14189 |
| C | -4.5133  | -3.21982 | -0.83143 |
| C | -5.20717 | -1.75083 | 0.95824  |
| C | -2.7084  | 1.1016   | -0.67591 |
| C | -3.69122 | 3.69251  | -0.64026 |
| C | -2.37796 | 1.97853  | -1.70729 |
| C | -3.56172 | 1.48695  | 0.36791  |
| C | -4.05055 | 2.7946   | 0.36472  |
| C | -2.85721 | 3.28534  | -1.6789  |
| C | -3.90528 | 0.43833  | 1.42762  |
| C | -5.10616 | 0.85473  | 2.27865  |
| C | -2.69051 | 0.25313  | 2.36938  |
| H | -6.19275 | -3.59565 | 0.46232  |
| H | -2.81599 | -2.53706 | -1.98169 |
| H | -4.6567  | -4.11775 | -1.42324 |
| H | -5.906   | -1.52601 | 1.75633  |
| H | -4.07697 | 4.70648  | -0.61756 |
| H | -1.75708 | 1.63165  | -2.5279  |
| H | -4.72152 | 3.12471  | 1.15003  |
| H | -2.59311 | 3.97364  | -2.47471 |
| H | -5.31626 | 0.09479  | 3.03575  |
| H | -6.00481 | 1.00345  | 1.67184  |
| H | -4.88798 | 1.78215  | 2.81433  |
| H | -1.79112 | -0.04856 | 1.82696  |
| H | -2.47843 | 1.19378  | 2.88701  |
| H | -2.91559 | -0.51624 | 3.11459  |
| C | -0.91556 | -0.59175 | -0.60714 |
| C | 1.82353  | -1.2725  | -0.43821 |
| C | -0.5003  | -1.91664 | -0.35622 |
| C | 0.08504  | 0.40319  | -0.70163 |
| C | 1.41924  | 0.05008  | -0.64234 |
| C | 0.84469  | -2.24467 | -0.26397 |
| H | -1.23352 | -2.69626 | -0.19906 |
| H | -0.16715 | 1.45217  | -0.79262 |
| H | 1.14264  | -3.26416 | -0.0418  |
| S | 3.51957  | -1.74342 | -0.36697 |
| O | 3.61773  | -2.94043 | 0.42713  |
| O | 4.0865   | -1.73183 | -1.68714 |

|   |         |          |          |
|---|---------|----------|----------|
| S | 2.61149 | 1.35492  | -0.83741 |
| O | 3.18334 | 1.262    | -2.15149 |
| O | 2.00439 | 2.58978  | -0.41753 |
| C | 3.8509  | 0.91913  | 0.35979  |
| C | 5.83344 | 0.31531  | 2.20809  |
| C | 4.24204 | -0.40865 | 0.56079  |
| C | 4.43683 | 1.94402  | 1.09133  |
| C | 5.44378 | 1.63673  | 2.00776  |
| C | 5.22191 | -0.71716 | 1.49487  |
| H | 4.09696 | 2.96398  | 0.94588  |
| H | 5.91076 | 2.43398  | 2.57573  |
| H | 5.48911 | -1.75535 | 1.66191  |
| H | 6.60524 | 0.07972  | 2.9328   |

**PXZ-TTR**

|   |          |          |          |
|---|----------|----------|----------|
| H | 1.15797  | -0.16965 | 3.30375  |
| C | 0.72921  | -0.22965 | 2.30897  |
| C | -0.32747 | -0.3026  | -0.28896 |
| C | 1.56011  | -0.43523 | 1.21664  |
| C | -0.64554 | -0.09743 | 2.10496  |
| C | -1.16894 | -0.13235 | 0.81638  |
| C | 1.03178  | -0.4747  | -0.07898 |
| H | -1.319   | 0.05396  | 2.94207  |
| H | -0.73035 | -0.29255 | -1.29817 |
| S | 3.29875  | -0.65596 | 1.51919  |
| O | 3.62035  | 0.01719  | 2.74824  |
| O | 3.61889  | -2.04616 | 1.36618  |
| S | 2.06663  | -0.75176 | -1.5     |
| O | 2.43263  | -2.13873 | -1.53499 |
| O | 1.4216   | -0.15532 | -2.63756 |
| C | 3.50381  | 0.21654  | -1.11088 |
| C | 5.78051  | 1.7159   | -0.57997 |
| C | 4.03227  | 0.25756  | 0.1839   |
| C | 4.10083  | 0.9366   | -2.13697 |
| C | 5.25455  | 1.67511  | -1.86817 |
| C | 5.16065  | 1.01874  | 0.45857  |
| H | 3.6577   | 0.92112  | -3.12712 |
| H | 5.53708  | 1.06644  | 1.47492  |
| H | 6.66751  | 2.30463  | -0.37309 |
| H | 5.73053  | 2.23174  | -2.66799 |
| N | -2.56906 | 0.04936  | 0.62672  |
| C | -3.33648 | -1.03472 | 0.14228  |
| C | -4.98488 | -3.11499 | -0.77163 |
| C | -2.83715 | -2.33157 | 0.01797  |
| C | -4.67892 | -0.80063 | -0.18725 |
| C | -5.49348 | -1.82065 | -0.64809 |
| C | -3.66007 | -3.36538 | -0.4341  |
| H | -1.8075  | -2.54319 | 0.2843   |
| H | -6.52384 | -1.58524 | -0.89276 |
| H | -3.25117 | -4.36635 | -0.51875 |
| H | -5.6254  | -3.91502 | -1.12586 |
| C | -3.03612 | 1.35433  | 0.34751  |
| C | -4.09771 | 3.90043  | -0.17369 |
| C | -4.38894 | 1.51895  | 0.01767  |
| C | -2.22224 | 2.48624  | 0.40316  |
| C | -2.75449 | 3.7528   | 0.1508   |
| C | -4.916   | 2.77135  | -0.24663 |
| H | -1.17195 | 2.38423  | 0.65296  |
| H | -2.10511 | 4.61971  | 0.20808  |
| H | -5.96881 | 2.84342  | -0.49824 |

H -4.51365 4.88202 -0.37197  
O -5.24702 0.44237 -0.01029

**PTZ-TTR (Planar)**

H 5.29108 -1.88227 -1.56922  
C 5.05056 -0.83497 -1.4195  
C 4.33404 1.85217 -1.06298  
C 4.05957 -0.48758 -0.51117  
C 5.7074 0.1712 -2.13004  
C 5.35189 1.50551 -1.95293  
C 3.70265 0.85312 -0.33364  
H 6.48761 -0.09481 -2.83494  
H 5.85425 2.2823 -2.51909  
H 4.02027 2.883 -0.93688  
S 3.27952 -1.79044 0.41479  
O 3.36127 -2.99919 -0.36303  
O 3.81621 -1.77948 1.74752  
S 2.4485 1.33787 0.82864  
O 2.9857 1.24504 2.15738  
O 1.88637 2.58399 0.38051  
C 1.22494 0.0647 0.61959  
C -0.74184 -1.85932 0.33744  
C 1.59508 -1.27207 0.44452  
C -0.10053 0.45405 0.64502  
C -1.11912 -0.5176 0.53903  
C 0.59577 -2.22448 0.27786  
H -0.33222 1.50913 0.72828  
H 0.87221 -3.25666 0.08917  
H -1.4978 -2.62183 0.19947  
N -2.46065 -0.14821 0.61993  
C -3.48319 -1.08065 0.26102  
C -5.44266 -2.89785 -0.5153  
C -3.84071 -2.12118 1.11638  
C -4.14004 -0.91897 -0.96299  
C -5.12608 -1.82895 -1.34944  
C -4.80879 -3.0403 0.7205  
H -3.34008 -2.20883 2.07613  
H -5.64379 -1.69087 -2.29348  
H -5.07486 -3.86007 1.37907  
H -6.20382 -3.60797 -0.82103  
C -2.84119 1.22447 0.48753  
C -3.55127 3.8932 0.14483  
C -2.65942 2.12904 1.53186  
C -3.42536 1.64369 -0.71221  
C -3.78588 2.98156 -0.88118  
C -2.99747 3.46799 1.35336  
H -2.2341 1.77677 2.46697  
H -4.25249 3.29902 -1.80843  
H -2.83523 4.17604 2.15874  
H -3.82239 4.93468 0.00761  
S -3.71618 0.45609 -1.98881

**PTZ-TTR (Orthogonal)**

H -0.1187 0.41835 0.35919  
C -0.0095 0.15159 1.40961  
C 0.27525 -0.50105 4.11343  
C 0.02949 -1.18945 1.80867  
C 0.09748 1.16179 2.36643  
C 0.23956 0.83611 3.71567  
C 0.17108 -1.51405 3.15313

H 0.0722 2.20574 2.0598  
H 0.3248 1.62655 4.45894  
H 0.38783 -0.74279 5.16958  
S -0.13121 -2.44876 0.58468  
O -0.99503 -1.90236 -0.44496  
O 1.20037 -2.92355 0.28359  
S 0.19537 -3.19677 3.68201  
O 1.53606 -3.69116 3.46427  
O -0.41886 -3.21289 4.99592  
C -0.87134 -4.12989 2.63346  
C -2.5864 -5.62112 1.01122  
C -1.01369 -3.80659 1.2881  
C -1.5862 -5.2006 3.18128  
C -2.44599 -5.95419 2.36833  
C -1.87438 -4.54902 0.47102  
H -1.47936 -5.46412 4.23301  
H -1.9921 -4.30595 -0.58425  
H -3.25175 -6.2059 0.37836  
N -3.17504 -7.06339 2.9195  
C -2.54903 -8.37183 2.91144  
C -1.24526 -10.9025 2.85825  
C -1.25028 -8.54586 2.36782  
C -3.1755 -9.51881 3.4282  
C -2.52075 -10.76717 3.39713  
C -0.60808 -9.78775 2.34149  
H -0.69823 -7.7101 1.94636  
H -3.01003 -11.65275 3.7997  
H 0.38901 -9.87466 1.9168  
H -0.75636 -11.87274 2.84428  
C -4.49781 -6.82028 3.4618  
C -7.08531 -6.25368 4.50597  
C -5.05442 -5.51558 3.44549  
C -5.28906 -7.83674 4.02362  
C -6.56915 -7.54523 4.53776  
C -6.32502 -5.23521 3.95781  
H -4.50639 -4.6753 3.02906  
H -7.17801 -8.3365 4.97252  
H -6.71276 -4.22019 3.92562  
H -8.0738 -6.04912 4.90807  
S -4.79351 -9.53199 4.14712

**Cz-Ph-TTR**

H 3.16686 -1.06775 3.09203  
C 2.73295 -0.86667 2.11814  
C 1.64796 -0.27899 -0.39136  
C 3.56588 -0.7142 1.01748  
C 1.35384 -0.76066 1.95336  
C 0.79222 -0.46484 0.70575  
C 3.01747 -0.4228 -0.23522  
H 0.70641 -0.91635 2.81031  
H 1.25597 0.00902 -1.36195  
S 5.31414 -0.90468 1.25444  
O 5.61281 -0.57703 2.62281  
O 5.72213 -2.17588 0.72722  
S 4.04209 -0.22527 -1.67438  
O 4.48512 -1.52118 -2.10437  
O 3.34933 0.63016 -2.5999  
C 5.43161 0.6746 -1.02979  
C 7.63488 2.08964 -0.10499

|                    |          |          |          |                   |          |          |          |
|--------------------|----------|----------|----------|-------------------|----------|----------|----------|
| C                  | 5.97739  | 0.38312  | 0.22475  | C                 | 2.20835  | -0.00412 | 0.48958  |
| C                  | 5.97389  | 1.68268  | -1.81588 | C                 | 1.34947  | -0.81619 | -0.26711 |
| C                  | 7.09108  | 2.37996  | -1.35319 | C                 | 3.28363  | -1.99785 | -1.1516  |
| C                  | 7.06915  | 1.09843  | 0.69881  | H                 | 1.81898  | 0.81373  | 1.08823  |
| H                  | 5.51615  | 1.91811  | -2.77088 | H                 | 3.71412  | -2.75011 | -1.80415 |
| H                  | 7.45871  | 0.8826   | 1.68811  | H                 | 1.25354  | -2.45036 | -1.66653 |
| H                  | 8.49299  | 2.6453   | 0.25709  | C                 | -0.11795 | -0.6053  | -0.21566 |
| H                  | 7.52404  | 3.16252  | -1.96666 | C                 | -2.88638 | -0.21085 | -0.11736 |
| C                  | -0.67485 | -0.3278  | 0.54098  | C                 | -0.74683 | -0.27702 | 0.99241  |
| C                  | -3.44927 | -0.06789 | 0.22644  | C                 | -0.8959  | -0.73191 | -1.37403 |
| C                  | -1.30743 | -0.78218 | -0.62323 | C                 | -2.27212 | -0.53504 | -1.32601 |
| C                  | -1.45568 | 0.25914  | 1.54482  | C                 | -2.12372 | -0.08232 | 1.04217  |
| C                  | -2.83209 | 0.38183  | 1.39623  | H                 | -0.16147 | -0.19848 | 1.90374  |
| C                  | -2.68135 | -0.64768 | -0.78611 | H                 | -0.42051 | -0.95982 | -2.32336 |
| H                  | -0.72421 | -1.2558  | -1.40724 | H                 | -2.8795  | -0.62198 | -2.22191 |
| H                  | -0.98413 | 0.63609  | 2.44734  | H                 | -2.61823 | 0.16313  | 1.97718  |
| H                  | -3.43496 | 0.82263  | 2.18397  | N                 | -4.29969 | -0.00924 | -0.06893 |
| H                  | -3.16391 | -0.98568 | -1.69777 | C                 | -5.13604 | -1.10603 | 0.18213  |
| N                  | -4.84776 | 0.06549  | 0.06819  | C                 | -6.76733 | -3.33556 | 0.69018  |
| C                  | -5.57334 | 1.24665  | 0.21504  | C                 | -4.57458 | -2.37766 | 0.40021  |
| C                  | -7.43021 | 3.2985   | 0.35212  | C                 | -6.53257 | -0.94627 | 0.21952  |
| C                  | -6.94028 | 0.97701  | -0.01702 | C                 | -7.31603 | -2.07603 | 0.47458  |
| C                  | -5.11681 | 2.53704  | 0.49653  | C                 | -5.38255 | -3.47839 | 0.65102  |
| C                  | -6.0643  | 3.55216  | 0.56387  | H                 | -3.49879 | -2.50377 | 0.37387  |
| C                  | -7.87331 | 2.01539  | 0.05635  | H                 | -8.39634 | -1.96589 | 0.50598  |
| H                  | -4.06309 | 2.74486  | 0.64906  | H                 | -4.92259 | -4.44761 | 0.81643  |
| H                  | -5.73793 | 4.56419  | 0.78154  | H                 | -7.40999 | -4.18726 | 0.88534  |
| H                  | -8.92708 | 1.82066  | -0.12006 | C                 | -4.81232 | 1.27632  | -0.2927  |
| H                  | -8.14151 | 4.11529  | 0.4141   | C                 | -5.78817 | 3.8709   | -0.74644 |
| C                  | -5.73228 | -0.96214 | -0.2562  | C                 | -6.19921 | 1.50684  | -0.26936 |
| C                  | -7.86591 | -2.63246 | -0.83385 | C                 | -3.93277 | 2.34574  | -0.54289 |
| C                  | -5.47493 | -2.32017 | -0.46145 | C                 | -4.41711 | 3.62739  | -0.7668  |
| C                  | -7.0421  | -0.43697 | -0.3179  | C                 | -6.65214 | 2.8097   | -0.49873 |
| C                  | -8.1147  | -1.28367 | -0.61255 | H                 | -2.86354 | 2.17166  | -0.56092 |
| C                  | -6.55839 | -3.14116 | -0.75289 | H                 | -3.71591 | 4.43396  | -0.95665 |
| H                  | -4.47064 | -2.72409 | -0.39043 | H                 | -7.7214  | 3.0011   | -0.48274 |
| H                  | -9.12629 | -0.89177 | -0.66323 | H                 | -6.17972 | 4.86752  | -0.91945 |
| H                  | -6.38756 | -4.20012 | -0.9187  | C                 | -7.2181  | 0.40004  | -0.00521 |
| H                  | -8.68686 | -3.30281 | -1.0654  | C                 | -8.04046 | 0.7621   | 1.25056  |
| <b>DMAC-Ph-TTR</b> |          |          |          | H                 | -7.38737 | 0.84806  | 2.12372  |
| H                  | 8.00076  | -0.35804 | -1.90256 | H                 | -8.79324 | -0.00407 | 1.45701  |
| C                  | 7.61655  | 0.4175   | -1.24843 | H                 | -8.5607  | 1.71446  | 1.11382  |
| C                  | 6.53354  | 2.4164   | 0.39393  | C                 | -8.16438 | 0.28645  | -1.22017 |
| C                  | 6.53163  | 0.14094  | -0.42718 | H                 | -8.68501 | 1.23177  | -1.39787 |
| C                  | 8.18224  | 1.6935   | -1.2223  | H                 | -8.9206  | -0.48599 | -1.05367 |
| C                  | 7.64462  | 2.68567  | -0.40722 | H                 | -7.60045 | 0.0286   | -2.12122 |
| C                  | 5.99155  | 1.13795  | 0.39206  | <b>PXZ-Ph-TTR</b> |          |          |          |
| H                  | 9.03536  | 1.91238  | -1.85517 | H                 | 7.47497  | -0.43839 | -2.02779 |
| H                  | 8.07742  | 3.68009  | -0.40302 | C                 | 7.12875  | 0.34493  | -1.36182 |
| H                  | 6.08082  | 3.18641  | 1.00962  | C                 | 6.14259  | 2.36566  | 0.31471  |
| S                  | 5.86797  | -1.50749 | -0.44978 | C                 | 6.06882  | 0.08969  | -0.50194 |
| O                  | 6.16192  | -2.08695 | -1.73304 | C                 | 7.71883  | 1.61012  | -1.35794 |
| O                  | 6.2785   | -2.18945 | 0.74465  | C                 | 7.22945  | 2.61305  | -0.52579 |
| S                  | 4.61059  | 0.81596  | 1.4626   | C                 | 5.57686  | 1.09769  | 0.33409  |
| O                  | 5.06364  | 0.04812  | 2.5875   | H                 | 8.55288  | 1.81228  | -2.02108 |
| O                  | 3.9195   | 2.05772  | 1.68299  | H                 | 7.68097  | 3.59903  | -0.53845 |
| C                  | 3.57747  | -0.21551 | 0.44724  | H                 | 5.72675  | 3.14475  | 0.94484  |
| C                  | 1.90516  | -1.8096  | -1.08117 | S                 | 5.37502  | -1.54633 | -0.49629 |
| C                  | 4.12022  | -1.20944 | -0.37275 | O                 | 5.61292  | -2.13449 | -1.78713 |



|   |          |          |          |   |          |          |          |
|---|----------|----------|----------|---|----------|----------|----------|
| O | 5.81419  | -2.23212 | 0.68565  | O | 4.72581  | 2.25902  | -1.20564 |
| S | 4.22865  | 0.80366  | 1.45308  | O | 3.78057  | 2.4309   | 1.08281  |
| O | 4.70592  | 0.03037  | 2.56404  | C | 5.78853  | 0.81078  | 0.70094  |
| O | 3.56805  | 2.05826  | 1.69319  | C | 8.05579  | -0.39523 | 1.75792  |
| C | 3.14187  | -0.21132 | 0.47794  | C | 6.25543  | -0.3951  | 0.16799  |
| C | 1.3868   | -1.7752  | -0.98827 | C | 6.44255  | 1.40709  | 1.77104  |
| C | 3.63643  | -1.21606 | -0.35911 | C | 7.59065  | 0.80501  | 2.28826  |
| C | 1.77922  | 0.02447  | 0.56982  | C | 7.37936  | -1.01056 | 0.70329  |
| C | 0.87956  | -0.77238 | -0.15456 | H | 6.04619  | 2.3245   | 2.1932   |
| C | 2.75838  | -1.98901 | -1.10724 | H | 7.70754  | -1.96281 | 0.30011  |
| H | 1.42579  | 0.84913  | 1.1814   | H | 8.93903  | -0.8678  | 2.17369  |
| H | 3.15157  | -2.74949 | -1.7737  | H | 8.11042  | 1.27054  | 3.11853  |
| H | 0.70259  | -2.40373 | -1.54942 | C | -0.43979 | -0.38458 | -0.02526 |
| C | -0.58102 | -0.53597 | -0.04682 | C | -3.20029 | -0.01644 | 0.5115   |
| C | -3.33479 | -0.09583 | 0.16038  | C | -1.05454 | 0.86023  | -0.2053  |
| C | -1.40273 | -0.6302  | -1.17916 | C | -1.23958 | -1.44278 | 0.42202  |
| C | -1.15834 | -0.21655 | 1.18745  | C | -2.59081 | -1.2704  | 0.68855  |
| C | -2.53025 | 0.00111  | 1.29188  | C | -2.40586 | 1.04712  | 0.05013  |
| C | -2.77114 | -0.41021 | -1.07767 | H | -0.47734 | 1.69854  | -0.58537 |
| H | -0.96531 | -0.8509  | -2.14827 | H | -0.79828 | -2.42088 | 0.59171  |
| H | -0.53836 | -0.16291 | 2.07738  | H | -3.17133 | -2.11627 | 1.03598  |
| H | -2.9875  | 0.23925  | 2.24691  | H | -2.84515 | 2.02121  | -0.12714 |
| H | -3.4109  | -0.47208 | -1.95354 | N | -4.56698 | 0.17439  | 0.80898  |
| N | -4.74229 | 0.12921  | 0.27505  | C | -5.41554 | -0.97424 | 0.88887  |
| C | -5.26499 | 1.36287  | -0.16365 | C | -7.02202 | -3.24965 | 0.9758   |
| C | -6.41969 | 3.79493  | -0.96828 | C | -6.16851 | -1.34494 | -0.23071 |
| C | -4.4615  | 2.44183  | -0.53559 | C | -5.50558 | -1.71744 | 2.06425  |
| C | -6.6581  | 1.52555  | -0.20123 | C | -6.29559 | -2.86389 | 2.10373  |
| C | -7.23214 | 2.71855  | -0.60476 | C | -6.97637 | -2.48272 | -0.18561 |
| C | -5.03777 | 3.65176  | -0.92942 | H | -4.9347  | -1.39536 | 2.93004  |
| H | -3.38234 | 2.33943  | -0.50665 | H | -6.35102 | -3.45019 | 3.01481  |
| H | -8.31467 | 2.78994  | -0.61682 | H | -7.56975 | -2.75541 | -1.05286 |
| H | -4.39261 | 4.47903  | -1.20559 | H | -7.64538 | -4.13724 | 1.00695  |
| H | -6.87056 | 4.73224  | -1.27505 | C | -5.22127 | 1.336    | 0.29111  |
| C | -5.60508 | -0.98567 | 0.265    | C | -6.44311 | 3.59197  | -0.79582 |
| C | -7.4221  | -3.12896 | 0.29362  | C | -5.14106 | 2.55804  | 0.95578  |
| C | -5.14867 | -2.30296 | 0.33269  | C | -5.95235 | 1.23401  | -0.8975  |
| C | -6.98934 | -0.76207 | 0.21547  | C | -6.56872 | 2.36347  | -1.43937 |
| C | -7.88838 | -1.81439 | 0.22014  | C | -5.73793 | 3.68958  | 0.40506  |
| C | -6.05399 | -3.3665  | 0.35253  | H | -4.58868 | 2.60887  | 1.88933  |
| H | -4.08297 | -2.49732 | 0.38112  | H | -7.14747 | 2.27374  | -2.35344 |
| H | -8.94803 | -1.58535 | 0.17787  | H | -5.65928 | 4.64375  | 0.91517  |
| H | -5.67562 | -4.38135 | 0.41399  | H | -6.91624 | 4.47039  | -1.22226 |
| H | -8.12777 | -3.95225 | 0.30684  | S | -6.09642 | -0.34207 | -1.68361 |
| O | -7.50193 | 0.51714  | 0.2114   |   |          |          |          |

**PTZ-Ph-TTR (Planar)**

|   |         |          |          |
|---|---------|----------|----------|
| H | 3.21691 | -2.90564 | -1.46729 |
| C | 2.84332 | -1.96315 | -1.08083 |
| C | 1.91804 | 0.45247  | -0.02234 |
| C | 3.73428 | -0.9268  | -0.83175 |
| C | 1.48555 | -1.77484 | -0.83611 |
| C | 0.99942 | -0.57302 | -0.3046  |
| C | 3.26345 | 0.28001  | -0.30412 |
| H | 0.79179 | -2.57561 | -1.07071 |
| H | 1.59303 | 1.37532  | 0.44789  |
| S | 5.44708 | -1.18232 | -1.20591 |
| O | 5.71403 | -2.59393 | -1.12656 |
| O | 5.78    | -0.4694  | -2.4071  |
| S | 4.36189 | 1.63482  | 0.0351   |

**PTZ-Ph-TTR (Orthogonal)**

|   |         |          |          |
|---|---------|----------|----------|
| H | 3.47336 | -1.20765 | -3.11796 |
| C | 3.03713 | -0.90835 | -2.17076 |
| C | 1.9391  | -0.23633 | 0.31222  |
| C | 3.86781 | -0.63774 | -1.09123 |
| C | 1.65631 | -0.81299 | -2.01278 |
| C | 1.08967 | -0.47533 | -0.77838 |
| C | 3.31362 | -0.30473 | 0.14816  |
| H | 1.01039 | -1.04173 | -2.85444 |
| H | 1.53647 | 0.01701  | 1.28815  |
| S | 5.62301 | -0.72102 | -1.33953 |
| O | 5.87403 | -1.63998 | -2.41713 |
| O | 6.14706 | 0.61333  | -1.4112  |
| S | 4.33557 | 0.06729  | 1.55477  |
| O | 4.89613 | 1.37758  | 1.3856   |

|   |          |          |          |   |          |          |          |
|---|----------|----------|----------|---|----------|----------|----------|
| O | 3.58112  | -0.23391 | 2.74176  | H | 1.197    | 4.75655  | 1.42243  |
| C | 5.6325   | -1.13805 | 1.40851  | H | 3.01447  | 3.79812  | 2.85227  |
| C | 7.69238  | -2.99493 | 1.2564   | H | 3.98164  | 1.57622  | 2.29471  |
| C | 6.18356  | -1.47621 | 0.1681   | C | -1.5589  | 2.90342  | -0.04765 |
| C | 6.09782  | -1.73778 | 2.57146  | C | -3.60797 | 1.6322   | 1.29801  |
| C | 7.14425  | -2.65811 | 2.49091  | C | -2.30205 | 3.6243   | 0.8812   |
| C | 7.20235  | -2.41602 | 0.08456  | C | -1.82811 | 1.56876  | -0.33853 |
| H | 5.63602  | -1.48886 | 3.52107  | C | -2.85144 | 0.92594  | 0.35572  |
| H | 7.59463  | -2.69155 | -0.88872 | C | -3.34517 | 2.977    | 1.54335  |
| H | 8.49414  | -3.72289 | 1.19766  | H | -2.06766 | 4.66648  | 1.07003  |
| H | 7.51767  | -3.12279 | 3.39689  | H | -1.264   | 1.03877  | -1.10046 |
| C | -0.38207 | -0.38591 | -0.61476 | H | -3.94208 | 3.51834  | 2.26956  |
| C | -3.16033 | -0.2169  | -0.31615 | H | -4.39441 | 1.11468  | 1.83883  |
| C | -0.9515  | 0.61336  | 0.18756  | N | 3.2434   | 0.00317  | 0.28845  |
| C | -1.22379 | -1.29625 | -1.26337 | N | -3.11476 | -0.43824 | 0.1081   |
| C | -2.60627 | -1.21197 | -1.11562 | C | 3.74106  | -0.40873 | -0.94748 |
| C | -2.33051 | 0.69713  | 0.3373   | C | 4.79632  | -1.69192 | -3.1596  |
| H | -0.3124  | 1.31514  | 0.71531  | C | 4.01892  | -1.79123 | -0.89138 |
| H | -0.80046 | -2.05862 | -1.91052 | C | 3.99084  | 0.34901  | -2.09363 |
| H | -3.26643 | -1.90704 | -1.62444 | C | 4.51815  | -0.31477 | -3.19507 |
| H | -2.7734  | 1.46654  | 0.96392  | C | 4.55301  | -2.43483 | -2.01148 |
| N | -4.58606 | -0.14716 | -0.1854  | H | 3.78475  | 1.41394  | -2.12692 |
| C | -5.15699 | -0.64233 | 1.01348  | H | 4.7207   | 0.2463   | -4.10175 |
| C | -6.34156 | -1.62654 | 3.37657  | H | 4.77364  | -3.49786 | -1.98261 |
| C | -6.55199 | -0.77597 | 1.12149  | H | 5.2077   | -2.17581 | -4.03918 |
| C | -4.36917 | -1.03725 | 2.10236  | C | 3.1724   | -1.10426 | 1.13192  |
| C | -4.95815 | -1.53483 | 3.26406  | C | 3.16324  | -3.58174 | 2.36772  |
| C | -7.1348  | -1.23501 | 2.30008  | C | 2.67837  | -1.19207 | 2.43574  |
| H | -3.28973 | -0.97151 | 2.04357  | C | 3.64927  | -2.23835 | 0.43713  |
| H | -4.32037 | -1.84281 | 4.08627  | C | 3.64549  | -3.48574 | 1.06714  |
| H | -8.21705 | -1.30495 | 2.3564   | C | 2.6829   | -2.44494 | 3.03916  |
| H | -6.80154 | -2.00159 | 4.28426  | H | 2.29004  | -0.3222  | 2.95571  |
| C | -5.26103 | 0.83771  | -0.9503  | H | 4.00261  | -4.36722 | 0.5425   |
| C | -6.64817 | 2.77167  | -2.46322 | H | 2.29619  | -2.54598 | 4.04816  |
| C | -4.56822 | 1.81442  | -1.6771  | H | 3.14811  | -4.54382 | 2.86902  |
| C | -6.66471 | 0.83259  | -1.01682 | C | -2.17513 | -1.47026 | 0.15969  |
| C | -7.34737 | 1.80632  | -1.7417  | C | -0.73887 | -3.83886 | 0.16856  |
| C | -5.25751 | 2.76107  | -2.4338  | C | -2.8203  | -2.68724 | -0.15096 |
| H | -3.48539 | 1.83238  | -1.66806 | C | -0.81837 | -1.42285 | 0.49489  |
| H | -8.43304 | 1.78533  | -1.7538  | C | -0.11465 | -2.62258 | 0.49188  |
| H | -4.6922  | 3.49766  | -2.99542 | C | -2.0905  | -3.87963 | -0.14858 |
| H | -7.18581 | 3.51482  | -3.04188 | H | -0.32523 | -0.49108 | 0.75926  |
| S | -7.57135 | -0.48909 | -0.28595 | H | 0.93911  | -2.62007 | 0.75406  |
|   |          |          |          | H | -2.57666 | -4.82138 | -0.38648 |
|   |          |          |          | H | -0.15475 | -4.75337 | 0.17522  |
|   |          |          |          | C | -4.35411 | -0.97878 | -0.23425 |
|   |          |          |          | C | -6.54506 | -2.50815 | -0.95934 |
|   |          |          |          | C | -5.57437 | -0.3314  | -0.44102 |
|   |          |          |          | C | -4.21272 | -2.37311 | -0.40416 |
|   |          |          |          | C | -5.32283 | -3.14095 | -0.76736 |
|   |          |          |          | C | -6.6634  | -1.11732 | -0.80136 |
|   |          |          |          | H | -5.67253 | 0.74416  | -0.33589 |
|   |          |          |          | H | -5.22784 | -4.21449 | -0.90239 |
|   |          |          |          | H | -7.62483 | -0.64174 | -0.96779 |
|   |          |          |          | H | -7.41647 | -3.09001 | -1.24068 |

### Cartesian Coordinates for The $S_1$ Geometries

#### m-Cz-DPS-Cz

|   |          |         |          |
|---|----------|---------|----------|
| S | -0.17709 | 3.66918 | -0.84997 |
| O | -0.06718 | 3.11252 | -2.17367 |
| O | -0.27193 | 5.09173 | -0.64594 |
| C | 1.18771  | 3.05995 | 0.10327  |
| C | 3.18614  | 1.99957 | 1.68884  |
| C | 1.71419  | 1.81456 | -0.22342 |
| C | 1.6321   | 3.7867  | 1.20437  |
| C | 2.64251  | 3.24483 | 1.9965   |
| C | 2.71918  | 1.28236 | 0.58328  |
| H | 1.34938  | 1.26274 | -1.08564 |

#### m-PTZ-DPS-PTZ

|   |          |          |          |
|---|----------|----------|----------|
| S | 0.14132  | -3.68446 | 0.13241  |
| O | 0.91979  | -4.42494 | 1.10364  |
| O | -0.86161 | -4.35468 | -0.66534 |

|   |          |          |          |                        |          |          |          |
|---|----------|----------|----------|------------------------|----------|----------|----------|
| C | -0.6877  | -2.39054 | 1.01616  | H                      | 7.50264  | 1.78052  | 0.63781  |
| C | -1.62626 | 0.00653  | 2.0632   | H                      | 6.95532  | -1.83753 | -1.61719 |
| C | -1.67372 | -1.67323 | 0.3284   | H                      | 8.47199  | -0.13577 | -0.59247 |
| C | -0.17587 | -1.92568 | 2.23127  | S                      | 4.90904  | 2.60055  | 1.08193  |
| C | -0.64966 | -0.71859 | 2.74669  |                        |          |          |          |
| C | -2.15285 | -0.48672 | 0.86117  |                        |          |          |          |
| H | -2.03834 | -2.0247  | -0.63519 | <b>m-DMAC-DPS-DMAC</b> |          |          |          |
| H | 0.59546  | -2.49673 | 2.73538  | S                      | 0.00582  | 4.0288   | 0.7148   |
| H | -0.25561 | -0.34243 | 3.68564  | O                      | 0.08223  | 5.4519   | 0.45719  |
| H | -2.0151  | 0.94043  | 2.45684  | O                      | -0.10207 | 3.53921  | 2.07522  |
| C | 1.19567  | -2.77295 | -0.87202 | C                      | 1.51185  | 3.33306  | 0.07426  |
| C | 2.05282  | -0.38623 | -2.16663 | C                      | 3.784    | 2.15275  | -1.02573 |
| C | 2.02749  | -1.82457 | -0.18889 | C                      | 2.38601  | 4.10256  | -0.69332 |
| C | 0.79551  | -2.48086 | -2.2096  | C                      | 1.74868  | 1.96839  | 0.26942  |
| C | 1.23017  | -1.34036 | -2.84463 | C                      | 2.87337  | 1.38123  | -0.29475 |
| C | 2.42147  | -0.69019 | -0.85326 | C                      | 3.52846  | 3.50789  | -1.23035 |
| H | 2.32848  | -1.98813 | 0.84188  | H                      | 2.17539  | 5.15675  | -0.83822 |
| H | 0.12093  | -3.17157 | -2.70477 | H                      | 1.07305  | 1.36613  | 0.87008  |
| H | 0.92507  | -1.14917 | -3.8674  | H                      | 4.22933  | 4.10759  | -1.80224 |
| H | 2.40589  | 0.51972  | -2.64527 | H                      | 4.67847  | 1.68501  | -1.42658 |
| N | -3.15912 | 0.29176  | 0.19107  | C                      | -1.25095 | 3.3385   | -0.20826 |
| C | -2.78942 | 1.07     | -0.9306  | C                      | -2.94605 | 1.88995  | -1.97712 |
| C | -2.06041 | 2.69664  | -3.11866 | C                      | -1.71066 | 2.03681  | 0.14402  |
| C | -1.64547 | 0.79197  | -1.68696 | C                      | -1.61871 | 3.88153  | -1.48453 |
| C | -3.59841 | 2.14722  | -1.33169 | C                      | -2.44782 | 3.18388  | -2.3249  |
| C | -3.24548 | 2.93706  | -2.42351 | C                      | -2.52948 | 1.37489  | -0.73646 |
| C | -1.26828 | 1.61524  | -2.74766 | H                      | -1.44679 | 1.59714  | 1.10067  |
| H | -1.07448 | -0.10417 | -1.47909 | H                      | -1.2488  | 4.86447  | -1.7583  |
| H | -3.90245 | 3.7512   | -2.71492 | H                      | -2.73969 | 3.62364  | -3.27339 |
| H | -0.3602  | 1.37472  | -3.2942  | H                      | -3.59801 | 1.32157  | -2.62781 |
| H | -1.78299 | 3.32626  | -3.95708 | N                      | 3.08928  | -0.01553 | -0.06633 |
| C | -4.52025 | -0.01734 | 0.41541  | N                      | -3.00419 | 0.06185  | -0.35816 |
| C | -7.24589 | -0.57143 | 0.84675  | C                      | 2.96581  | -0.94043 | -1.11616 |
| C | -5.5064  | 0.93348  | 0.10288  | C                      | 2.89961  | -2.84468 | -3.17337 |
| C | -4.91979 | -1.23221 | 0.98295  | C                      | 2.92675  | -2.31472 | -0.79455 |
| C | -6.27033 | -1.49818 | 1.20311  | C                      | 2.89651  | -0.53606 | -2.45787 |
| C | -6.85595 | 0.6452   | 0.28981  | C                      | 2.86825  | -1.4858  | -3.47584 |
| H | -4.17782 | -1.97183 | 1.2597   | C                      | 2.91867  | -3.24278 | -1.83593 |
| H | -6.55268 | -2.44691 | 1.64759  | H                      | 2.87963  | 0.51728  | -2.70928 |
| H | -7.59562 | 1.39242  | 0.01788  | H                      | 2.82985  | -1.15314 | -4.50857 |
| H | -8.29734 | -0.78442 | 1.00603  | H                      | 2.91599  | -4.30291 | -1.6058  |
| S | -5.02559 | 2.55984  | -0.386   | H                      | 2.8962   | -3.58776 | -3.96401 |
| N | 3.21789  | 0.28534  | -0.12756 | C                      | 3.74369  | -0.41445 | 1.11627  |
| C | 2.54798  | 1.24128  | 0.6185   | C                      | 5.14472  | -1.26803 | 3.37935  |
| C | 1.13783  | 3.15596  | 2.13865  | C                      | 4.42252  | 0.5132   | 1.91697  |
| C | 3.22017  | 2.31539  | 1.24988  | C                      | 3.72073  | -1.77569 | 1.47282  |
| C | 1.148    | 1.15204  | 0.78088  | C                      | 4.44717  | -2.18314 | 2.5918   |
| C | 0.45749  | 2.09844  | 1.50717  | C                      | 5.11228  | 0.08348  | 3.04628  |
| C | 2.50824  | 3.25568  | 2.01546  | H                      | 4.41786  | 1.56456  | 1.65263  |
| H | 0.62034  | 0.32809  | 0.32976  | H                      | 4.45804  | -3.23113 | 2.87133  |
| H | -0.62051 | 2.00901  | 1.58537  | H                      | 5.63477  | 0.81241  | 3.65762  |
| H | 3.05409  | 4.05462  | 2.50711  | H                      | 5.6938   | -1.60858 | 4.25089  |
| H | 0.59275  | 3.88548  | 2.72664  | C                      | -2.29588 | -1.04284 | -0.79074 |
| C | 4.59607  | 0.20507  | -0.25814 | C                      | -0.85689 | -3.23284 | -1.72675 |
| C | 7.39633  | -0.03208 | -0.50832 | C                      | -1.13042 | -0.84782 | -1.57655 |
| C | 5.17298  | -0.88839 | -0.94959 | C                      | -2.73429 | -2.34857 | -0.45646 |
| C | 5.46564  | 1.17335  | 0.29735  | C                      | -1.99238 | -3.42272 | -0.94129 |
| C | 6.85953  | 1.03691  | 0.17752  | C                      | -0.42426 | -1.93963 | -2.038   |
| C | 6.54123  | -0.99427 | -1.07662 | H                      | -0.80222 | 0.15652  | -1.81042 |
| H | 4.53217  | -1.64845 | -1.37295 | H                      | -2.29937 | -4.43458 | -0.69799 |
|   |          |          |          | H                      | 0.4694   | -1.7906  | -2.63302 |

|   |          |          |          |   |             |             |             |
|---|----------|----------|----------|---|-------------|-------------|-------------|
| H | -0.29704 | -4.0907  | -2.08565 | C | -0.81458200 | -2.35358600 | -1.81543700 |
| C | -4.16431 | -0.03735 | 0.39133  | H | -0.68947200 | -0.69191800 | -0.45863600 |
| C | -6.47817 | -0.1726  | 1.93131  | H | -3.71118300 | -3.86950800 | -2.83104100 |
| C | -4.64966 | -1.30519 | 0.7919   | H | 0.25947300  | -2.40691300 | -1.95311600 |
| C | -4.84891 | 1.14893  | 0.75389  | H | -1.23642700 | -3.99721400 | -3.15574100 |
| C | -5.9969  | 1.07339  | 1.51637  | C | -4.67747900 | -0.36488000 | 0.23226500  |
| C | -5.80629 | -1.3374  | 1.56712  | C | -7.45820500 | -0.37057800 | 0.48709800  |
| H | -4.46596 | 2.10714  | 0.43005  | C | -5.30458500 | 0.56492700  | 1.08585000  |
| H | -6.51661 | 1.98341  | 1.79294  | C | -5.47403400 | -1.28939200 | -0.48046700 |
| H | -6.19772 | -2.29304 | 1.90016  | C | -6.85916400 | -1.29277100 | -0.35616500 |
| H | -7.37595 | -0.23732 | 2.53639  | C | -6.67947100 | 0.55457900  | 1.20654900  |
| C | -3.94917 | -2.59721 | 0.41683  | H | -4.69353900 | 1.27322300  | 1.63129100  |
| C | 2.80276  | -2.69555 | 0.67703  | H | -7.43228200 | -2.01685800 | -0.92338700 |
| C | 3.09986  | -4.17471 | 0.92568  | H | -7.16128100 | 1.27035500  | 1.86202700  |
| H | 2.9641   | -4.41704 | 1.98272  | H | -8.53723300 | -0.36394400 | 0.59072300  |
| H | 4.12109  | -4.43966 | 0.63355  | C | 4.72953400  | -0.10981000 | -0.29459400 |
| H | 2.40092  | -4.8037  | 0.36774  | C | 7.39401100  | -0.38374300 | -1.15131500 |
| C | 1.34719  | -2.41386 | 1.12914  | C | 5.57399900  | -1.07924400 | 0.26625400  |
| H | 1.06389  | -1.37527 | 0.92978  | C | 5.25000400  | 0.72494900  | -1.28582700 |
| H | 1.25114  | -2.6014  | 2.20374  | C | 6.57255800  | 0.58893100  | -1.71040500 |
| H | 0.65448  | -3.06733 | 0.58854  | C | 6.88560600  | -1.22044300 | -0.15643800 |
| C | -4.94426 | -3.50644 | -0.34315 | H | 4.61539300  | 1.49077800  | -1.71837700 |
| H | -5.81792 | -3.71943 | 0.27679  | H | 6.95246100  | 1.25387700  | -2.47873100 |
| H | -4.47465 | -4.45908 | -0.59818 | H | 7.49432500  | -1.98798600 | 0.31011800  |
| H | -5.27997 | -3.02487 | -1.26521 | H | 8.42263600  | -0.49424500 | -1.47654700 |
| C | -3.48415 | -3.30534 | 1.71341  | C | 2.92133700  | -0.97174200 | 1.05728000  |
| H | -4.33952 | -3.51486 | 2.36045  | C | 2.02906300  | -2.97332700 | 2.82646200  |
| H | -2.77588 | -2.67923 | 2.26261  | C | 1.58207500  | -1.03528800 | 1.45130800  |
| H | -2.99706 | -4.25358 | 1.4727   | C | 3.80783000  | -1.92682700 | 1.57952000  |

**m-PXZ-DPS-PXZ**

|   |             |             |             |
|---|-------------|-------------|-------------|
| S | -0.25022500 | 3.61034900  | -0.06261400 |
| O | 0.55233300  | 4.44401700  | 0.80493000  |
| O | -1.07505000 | 4.20891400  | -1.09130300 |
| C | -1.19246800 | 2.54167600  | 0.89472100  |
| C | -2.02722000 | 0.08708300  | 2.07614900  |
| C | -2.09247000 | 1.68268100  | 0.20352800  |
| C | -0.70699500 | 2.13501500  | 2.18207300  |
| C | -1.13221800 | 0.96141100  | 2.75549500  |
| C | -2.46237900 | 0.50506900  | 0.80448000  |
| H | -2.44544200 | 1.93565300  | -0.79196000 |
| H | -0.00048900 | 2.77857100  | 2.69603800  |
| H | -0.76644200 | 0.68421600  | 3.73953700  |
| C | 0.82325100  | 2.46476700  | -0.88129700 |
| C | 2.09042800  | 0.19082100  | -1.87962500 |
| C | 0.45449700  | 1.95437200  | -2.13016500 |
| C | 1.83967900  | 1.85376900  | -0.13258600 |
| C | 2.45081900  | 0.71245800  | -0.62831700 |
| C | 1.10633000  | 0.82782200  | -2.63184300 |
| H | -0.33392000 | 2.44532000  | -2.69100500 |
| H | 2.11802200  | 2.23983800  | 0.84403700  |
| H | 0.83109700  | 0.43499900  | -3.60603100 |
| H | 2.59197200  | -0.70007700 | -2.24714300 |
| N | -3.31030700 | -0.39685200 | 0.06306000  |
| N | 3.40928200  | 0.01761200  | 0.17793800  |
| C | -2.73076400 | -1.32429600 | -0.77572900 |
| C | -1.66028200 | -3.25123400 | -2.49307700 |
| C | -1.33504700 | -1.39509800 | -0.97000400 |
| C | -3.56540600 | -2.23476700 | -1.46496400 |
| C | -3.03487300 | -3.19280800 | -2.32195100 |

**m-DPA-DPS-DPA**

|   |             |            |             |
|---|-------------|------------|-------------|
| S | 0.18645900  | 3.45934000 | 0.99708100  |
| O | 0.24254500  | 4.87216600 | 0.68987700  |
| O | 0.01981600  | 3.02766600 | 2.36959400  |
| C | -1.02006000 | 2.68559200 | 0.04833300  |
| C | -2.57515300 | 1.02893900 | -1.66555900 |
| C | -1.66981900 | 1.53758100 | 0.56959000  |
| C | -1.14055400 | 2.97720000 | -1.34425200 |
| C | -1.89421600 | 2.16721000 | -2.16847800 |
| C | -2.41709500 | 0.74857800 | -0.28532800 |
| H | -1.61408100 | 1.31570100 | 1.63088900  |
| H | -0.63084200 | 3.84874600 | -1.74532300 |
| H | -1.96517400 | 2.40471700 | -3.22539900 |
| H | -3.10440300 | 0.33865900 | -2.31062300 |
| C | 1.71793100  | 2.77456200 | 0.39838800  |
| C | 3.96169100  | 1.64043200 | -0.77980200 |
| C | 2.69415200  | 3.60519700 | -0.14810700 |
| C | 1.85211600  | 1.38642800 | 0.37083900  |
| C | 2.95670800  | 0.81549900 | -0.25547900 |
| C | 3.83218800  | 3.02455900 | -0.70966800 |
| H | 2.55326300  | 4.67996300 | -0.12653800 |

|                    |             |             |             |                      |             |             |             |
|--------------------|-------------|-------------|-------------|----------------------|-------------|-------------|-------------|
| H                  | 1.07456600  | 0.74887400  | 0.78533900  | H                    | -1.56084500 | -2.90282400 | -1.54668300 |
| H                  | 4.61045800  | 3.65670400  | -1.12522100 | H                    | -1.54120600 | -1.87600700 | 2.66402600  |
| H                  | 4.82619200  | 1.18828700  | -1.25632200 | H                    | -3.32108200 | -0.19352500 | 2.26950500  |
| N                  | -3.09365900 | -0.38363300 | 0.24631600  | H                    | -3.32213800 | -1.20505900 | -1.95973900 |
| N                  | 3.02732200  | -0.59612100 | -0.40690800 | C                    | 1.31996800  | -2.46615400 | 0.58497300  |
| C                  | -2.44931500 | -1.20071900 | 1.18178000  | C                    | 3.38540400  | -0.65377700 | 0.16753600  |
| C                  | -1.14758600 | -2.75095000 | 3.09007900  | C                    | 1.82692300  | -2.27790100 | -0.70525000 |
| C                  | -1.07235500 | -1.45929800 | 1.04828800  | C                    | 1.84144700  | -1.74851000 | 1.66672800  |
| C                  | -3.17296800 | -1.72128700 | 2.27208000  | C                    | 2.88133300  | -0.85161500 | 1.45839400  |
| C                  | -2.51553600 | -2.49168500 | 3.21970500  | C                    | 2.85419000  | -1.36724900 | -0.91385700 |
| C                  | -0.43421800 | -2.23851600 | 2.00345500  | H                    | 1.41439500  | -2.84924200 | -1.53041100 |
| H                  | -0.53762700 | -1.07991600 | 0.18301600  | H                    | 1.45120200  | -1.92664400 | 2.66340100  |
| H                  | -4.22352900 | -1.47573200 | 2.38479700  | H                    | 3.24953500  | -1.19867600 | -1.91091400 |
| H                  | -3.06361200 | -2.87089900 | 4.07522600  | N                    | -4.44446400 | 0.35764700  | -0.09778300 |
| H                  | 0.62368700  | -2.45040700 | 1.89193300  | C                    | -5.72473900 | 0.07565900  | -0.54381500 |
| H                  | -0.63780900 | -3.34815200 | 3.83865900  | C                    | -8.32181500 | -0.02360100 | -1.41871600 |
| C                  | -4.41149000 | -0.62221500 | -0.13629800 | C                    | -6.26353600 | -1.17933100 | -0.83891700 |
| C                  | -7.03463200 | -1.07609400 | -0.95023200 | C                    | -6.46050800 | 1.28176600  | -0.66272900 |
| C                  | -5.24927000 | 0.47319700  | -0.44088400 | C                    | -7.76797000 | 1.23278100  | -1.10291500 |
| C                  | -4.89075400 | -1.94287600 | -0.25069100 | C                    | -7.58521200 | -1.20365000 | -1.28585200 |
| C                  | -6.19707500 | -2.16156000 | -0.65589000 | H                    | -5.67591200 | -2.08218100 | -0.71517800 |
| C                  | -6.55921500 | 0.23061300  | -0.83919100 | H                    | -8.36310300 | 2.13447500  | -1.20310700 |
| H                  | -4.87686500 | 1.48212600  | -0.30907700 | H                    | -8.04799900 | -2.15340700 | -1.52858800 |
| H                  | -4.21944700 | -2.77302000 | -0.05691800 | H                    | -9.34746500 | -0.07451800 | -1.76778400 |
| H                  | -6.56366000 | -3.17673300 | -0.76054700 | C                    | -4.32751500 | 1.72507700  | 0.08747900  |
| H                  | -7.21395500 | 1.06774600  | -1.05509600 | C                    | -4.54230700 | 4.44846300  | 0.32959100  |
| H                  | -8.05689400 | -1.25451100 | -1.26664700 | C                    | -5.55769900 | 2.35276100  | -0.23344800 |
| C                  | 1.94901200  | -1.27802500 | -1.01086600 | C                    | -3.19885500 | 2.43085600  | 0.51175100  |
| C                  | -0.21267800 | -2.64810400 | -2.18835400 | C                    | -3.33407500 | 3.81460800  | 0.63142600  |
| C                  | 1.72409000  | -2.63532700 | -0.73239200 | C                    | -5.66675400 | 3.72361500  | -0.11197700 |
| C                  | 1.07466700  | -0.61512900 | -1.88933200 | H                    | -2.26835600 | 1.91748300  | 0.72703300  |
| C                  | 0.00453400  | -1.29738100 | -2.46355700 | H                    | -2.48667700 | 4.40646900  | 0.95819500  |
| C                  | 0.65861200  | -3.30954800 | -1.32272600 | H                    | -6.59066900 | 4.23939200  | -0.35261700 |
| H                  | 2.38930600  | -3.15796000 | -0.05177500 | H                    | -4.61641700 | 5.52577200  | 0.43095400  |
| H                  | 1.22622200  | 0.43476100  | -2.11832900 | H                    | 3.32459300  | -0.31572600 | 2.29218800  |
| H                  | -0.65958600 | -0.76030500 | -3.13330800 | N                    | 4.43977500  | 0.26600000  | -0.04491600 |
| H                  | 0.50213500  | -4.35815000 | -1.08779600 | C                    | 5.64436800  | -0.01084000 | -0.68716000 |
| H                  | -1.04681300 | -3.17494100 | -2.64000600 | C                    | 8.16498300  | -0.06660400 | -1.83439200 |
| C                  | 4.26515700  | -1.24258400 | -0.15896100 | C                    | 6.43482400  | 1.16018900  | -0.70925800 |
| C                  | 6.73886200  | -2.45716800 | 0.35305000  | C                    | 6.10596600  | -1.21989000 | -1.21510800 |
| C                  | 4.78810400  | -2.18275800 | -1.05472300 | C                    | 7.37205000  | -1.22627200 | -1.78873700 |
| C                  | 4.99150400  | -0.91065700 | 0.99092700  | C                    | 7.70484800  | 1.12724800  | -1.29193000 |
| C                  | 6.22329700  | -1.50999000 | 1.23780300  | H                    | 5.50506200  | -2.12196500 | -1.17201500 |
| C                  | 6.01318700  | -2.79013500 | -0.79072500 | H                    | 7.75642900  | -2.15117000 | -2.20693800 |
| H                  | 4.23360400  | -2.43274000 | -1.95397300 | H                    | 8.32290400  | 2.02002700  | -1.31488100 |
| H                  | 4.58525000  | -0.17758300 | 1.68158100  | H                    | 9.14805300  | -0.10896200 | -2.29140800 |
| H                  | 6.77664800  | -1.24101600 | 2.13216000  | C                    | 4.44460300  | 1.60107100  | 0.34877200  |
| H                  | 6.40799500  | -3.51759500 | -1.49328400 | C                    | 4.91808800  | 4.27832300  | 0.88349200  |
| H                  | 7.69617100  | -2.92793600 | 0.55072500  | C                    | 3.44495800  | 2.33637300  | 0.99214600  |
| <b>p-Cz-DPS-Cz</b> |             |             |             | C                    | 5.66611800  | 2.19365700  | -0.04468200 |
| S                  | -0.08374400 | -3.51729800 | 0.82675000  | C                    | 5.90052200  | 3.54363500  | 0.22991100  |
| O                  | -0.04489300 | -3.93174000 | 2.21380100  | C                    | 3.70316700  | 3.67706400  | 1.25434600  |
| O                  | -0.03983400 | -4.50356400 | -0.23286400 | H                    | 2.50149900  | 1.88045600  | 1.27299700  |
| C                  | -1.44245100 | -2.50093200 | 0.58533200  | H                    | 6.83503600  | 4.01088700  | -0.06666000 |
| C                  | -3.42849400 | -0.59156800 | 0.12931900  | H                    | 2.94648700  | 4.27168700  | 1.75657000  |
| C                  | -1.94743500 | -2.29800600 | -0.73298900 | H                    | 5.08614600  | 5.32672600  | 1.10651000  |
| C                  | -1.93097700 | -1.70786400 | 1.66526900  | <b>p-PTZ-DPS-PTZ</b> |             |             |             |
| C                  | -2.90879700 | -0.77095300 | 1.44725600  | S                    | 0.12866300  | 4.22414300  | 0.00365500  |
| C                  | -2.92944400 | -1.36839300 | -0.96050300 | O                    | 0.01019300  | 4.92349600  | 1.26629000  |

|   |             |             |             |                        |             |             |             |
|---|-------------|-------------|-------------|------------------------|-------------|-------------|-------------|
| O | 0.07513200  | 4.96121900  | -1.24167900 | H                      | -5.06836000 | 2.05745500  | 0.28450900  |
| C | 1.51782600  | 3.22739400  | 0.01210600  | H                      | -7.49421400 | 2.40931600  | 0.19889600  |
| C | 3.19507500  | 0.98936100  | -0.06932300 | H                      | -8.08174400 | -1.78550200 | -0.53163200 |
| C | 2.03564600  | 2.75885100  | -1.23472200 | H                      | -9.03793500 | 0.48972900  | -0.19039000 |
| C | 1.85992600  | 2.53844200  | 1.21770600  | S                      | -5.40093000 | -2.70823800 | -0.77986700 |
| C | 2.68069600  | 1.43983600  | 1.17892000  |                        |             |             |             |
| C | 2.86682900  | 1.66792200  | -1.27529500 |                        |             |             |             |
| H | 1.77148900  | 3.28626700  | -2.14551000 | <b>p-DMAC-DPS-DMAC</b> |             |             |             |
| H | 1.46476600  | 2.89734100  | 2.16304600  | S                      | 0.04906400  | 3.79150900  | -0.03827600 |
| H | 2.94851800  | 0.91457600  | 2.09156600  | O                      | -0.00715200 | 4.50254500  | -1.29968100 |
| H | 3.27404500  | 1.31526700  | -2.21884700 | O                      | -0.01549400 | 4.52165700  | 1.21179200  |
| C | -1.19436200 | 3.03979000  | -0.03407100 | C                      | 1.41923100  | 2.77601800  | -0.02309000 |
| C | -2.91960000 | 0.86320600  | -0.03188700 | C                      | 3.43776400  | 0.84020300  | 0.00846700  |
| C | -1.49342100 | 2.39285800  | -1.23698100 | C                      | 1.92758900  | 2.28756400  | 1.21992800  |
| C | -1.77111500 | 2.61598000  | 1.16731800  | C                      | 1.91656000  | 2.23577000  | -1.24924500 |
| C | -2.64464900 | 1.53377800  | 1.16254600  | C                      | 2.91142900  | 1.29275200  | -1.23831100 |
| C | -2.35696200 | 1.30176700  | -1.23147600 | C                      | 2.92435100  | 1.34663200  | 1.23970500  |
| H | -1.04507100 | 2.74404900  | -2.16115900 | H                      | 1.53422700  | 2.69140100  | 2.14725100  |
| H | -1.53191700 | 3.14072400  | 2.08630900  | H                      | 1.51498200  | 2.60033300  | -2.18932900 |
| H | -3.10928500 | 1.19333300  | 2.08439800  | H                      | 3.31291400  | 0.89725300  | -2.16675000 |
| H | -2.60341100 | 0.77815500  | -2.15014000 | H                      | 3.33591400  | 0.99226100  | 2.18029000  |
| N | 3.88528900  | -0.26196300 | -0.13221800 | C                      | -1.35869400 | 2.70307000  | -0.03591700 |
| C | 5.26669500  | -0.26212400 | 0.02584500  | C                      | -3.43313000 | 0.86115000  | -0.03312800 |
| C | 8.06396000  | -0.17377300 | 0.36152900  | C                      | -1.84004700 | 2.20814200  | 1.17904200  |
| C | 6.04159000  | -1.44833700 | 0.01474200  | C                      | -1.90673700 | 2.28036700  | -1.24899200 |
| C | 5.93719400  | 0.97013100  | 0.21156600  | C                      | -2.95039200 | 1.35928300  | -1.24347600 |
| C | 7.30569200  | 1.00892700  | 0.37359500  | C                      | -2.87991700 | 1.28413600  | 1.17671900  |
| C | 7.43337200  | -1.38938900 | 0.18369600  | H                      | -1.40871700 | 2.56293200  | 2.10956100  |
| H | 5.35456300  | 1.88134700  | 0.22291200  | H                      | -1.52620200 | 2.69090600  | -2.17849600 |
| H | 7.79521200  | 1.96612200  | 0.51220400  | H                      | -3.28005400 | 0.89139400  | 2.10695100  |
| H | 8.00457100  | -2.31251000 | 0.17121200  | N                      | 4.50733500  | -0.09913200 | 0.02407600  |
| H | 9.13969500  | -0.13720900 | 0.49076200  | C                      | 4.21836600  | -1.45846200 | 0.08167500  |
| C | 3.12303300  | -1.40540900 | -0.35071800 | C                      | 5.81824400  | 0.36443700  | -0.01630300 |
| C | 1.51017300  | -3.67507400 | -0.80196900 | C                      | 5.25451400  | -2.42268800 | 0.10009300  |
| C | 1.72396400  | -1.27858400 | -0.53703600 | C                      | 6.90949800  | -0.53748900 | -0.00491500 |
| C | 3.68590900  | -2.70621800 | -0.39958900 | C                      | 6.72180800  | -2.04137700 | 0.05513700  |
| C | 2.87056800  | -3.82699600 | -0.62014800 | C                      | 7.36513300  | -2.67754900 | -1.20073000 |
| C | 0.94130600  | -2.39056000 | -0.76426800 | C                      | 7.41860500  | -2.58144500 | 1.32728000  |
| H | 1.27339400  | -0.29543600 | -0.50475700 | C                      | 2.86043400  | -1.85549400 | 0.12410500  |
| H | 3.32660600  | -4.81183000 | -0.64798600 | H                      | 2.08901800  | -1.09713200 | 0.10895700  |
| H | -0.12676400 | -2.26660200 | -0.90491700 | C                      | 2.53564300  | -3.19627400 | 0.18495000  |
| H | 0.88541200  | -4.54459700 | -0.97331600 | H                      | 1.49438500  | -3.49533100 | 0.21996400  |
| S | 5.36759300  | -3.02084000 | -0.19343900 | C                      | 3.54994000  | -4.15789500 | 0.20329400  |
| N | -3.77726600 | -0.28756300 | -0.05409000 | H                      | 3.30235500  | -5.21283000 | 0.25105700  |
| C | -3.25996100 | -1.50379400 | 0.44842900  | C                      | 4.88581000  | -3.76432600 | 0.16062400  |
| C | -2.27402800 | -3.96194700 | 1.43073500  | H                      | 5.65665100  | -4.52813000 | 0.17538100  |
| C | -2.03733200 | -1.56947500 | 1.13162100  | H                      | 7.26155100  | -3.76487300 | -1.17328400 |
| C | -3.96655600 | -2.70380300 | 0.24297100  | H                      | 8.43072200  | -2.44054400 | -1.24566800 |
| C | -3.49111800 | -3.90923300 | 0.75266700  | H                      | 6.88671700  | -2.30493300 | -2.11026800 |
| C | -1.55034500 | -2.78715000 | 1.60683500  | H                      | 8.48466100  | -2.34305400 | 1.30905000  |
| H | -1.45129000 | -0.67087200 | 1.28396500  | H                      | 6.97822000  | -2.14026100 | 2.22526700  |
| H | -4.07542500 | -4.81090400 | 0.59427700  | H                      | 7.31608900  | -3.66739800 | 1.38693200  |
| H | -0.59523300 | -2.80329000 | 2.12315500  | C                      | 6.03622200  | 1.76228800  | -0.07060400 |
| H | -1.90332400 | -4.90687100 | 1.81338100  | H                      | 5.18510000  | 2.43006500  | -0.07741800 |
| C | -5.17554600 | -0.06348200 | -0.08765800 | C                      | 7.32417900  | 2.25826500  | -0.11354800 |
| C | -7.96426400 | 0.33906300  | -0.16208200 | H                      | 7.48526600  | 3.32933800  | -0.15484400 |
| C | -6.05289800 | -1.13058800 | -0.34244900 | C                      | 8.40950300  | 1.37746600  | -0.10376300 |
| C | -5.72149400 | 1.21163900  | 0.10670600  | H                      | 9.42399000  | 1.75983100  | -0.13753800 |
| C | -7.10061100 | 1.40815700  | 0.05639800  | C                      | 8.19239700  | 0.00212600  | -0.04974200 |
| C | -7.43157500 | -0.93452000 | -0.35130000 | H                      | 9.05025000  | -0.66239000 | -0.04208600 |
|   |             |             |             | N                      | -4.50929400 | -0.08216800 | -0.03045800 |

|                      |             |             |             |                      |             |             |             |
|----------------------|-------------|-------------|-------------|----------------------|-------------|-------------|-------------|
| H                    | -3.40422700 | 1.02443300  | -2.17171000 | C                    | -2.43456900 | 3.44543500  | 0.27377400  |
| C                    | -5.82664800 | 0.38684800  | 0.06575700  | C                    | -4.79221600 | 4.01197500  | 0.22696300  |
| C                    | -4.21886000 | -1.44801300 | -0.11953100 | H                    | -1.94716200 | 1.34762000  | 0.16574200  |
| C                    | -6.90842500 | -0.51153400 | 0.08356000  | H                    | -1.40035200 | 3.76408300  | 0.33108800  |
| C                    | -5.25120500 | -2.40413800 | -0.11125000 | H                    | -5.60667500 | 4.72696500  | 0.24228200  |
| C                    | -6.72717400 | -2.02580000 | -0.00270200 | H                    | -3.22084000 | 5.45690400  | 0.36649500  |
| C                    | -2.88000400 | -1.87250500 | -0.21806000 | C                    | -5.74676800 | -0.01361000 | -0.03291900 |
| H                    | -2.08349500 | -1.13802200 | -0.22380200 | C                    | -8.46402700 | -0.65347200 | -0.14723900 |
| C                    | -4.89886000 | -3.75401600 | -0.20416900 | C                    | -6.14879500 | -1.36129700 | -0.11872500 |
| H                    | -5.68785100 | -4.50097000 | -0.19834500 | C                    | -6.73630100 | 0.99492100  | -0.00594900 |
| C                    | -2.56707000 | -3.22161200 | -0.31022900 | C                    | -8.08874800 | 0.67865600  | -0.06319700 |
| H                    | -1.52612000 | -3.51995900 | -0.38949900 | C                    | -7.49335400 | -1.66999300 | -0.17465300 |
| C                    | -3.57843500 | -4.17924800 | -0.30408400 | H                    | -5.38723700 | -2.13086400 | -0.13866900 |
| H                    | -3.34698700 | -5.23658800 | -0.37606800 | H                    | -8.81435400 | 1.48347500  | -0.04036900 |
| C                    | -6.06997700 | 1.77085100  | 0.14333700  | H                    | -7.79952300 | -2.70741100 | -0.24035800 |
| H                    | -5.23871500 | 2.46538600  | 0.12646100  | H                    | -9.51660600 | -0.90929500 | -0.19186700 |
| C                    | -8.19970200 | 0.01606100  | 0.18327300  | O                    | -6.40009900 | 2.30601100  | 0.07573700  |
| H                    | -9.04389000 | -0.66774100 | 0.19884100  | N                    | 4.38796000  | 0.35714200  | 0.29318400  |
| C                    | -7.36507300 | 2.26027300  | 0.24098800  | C                    | 4.08318100  | 1.69708900  | -0.00610200 |
| H                    | -7.52304100 | 3.33259700  | 0.29958900  | C                    | 3.59074700  | 4.41278300  | -0.54799500 |
| C                    | -8.44630700 | 1.38224800  | 0.26283300  | C                    | 2.78711200  | 2.14680100  | -0.26620200 |
| H                    | -9.46314700 | 1.75214400  | 0.33938900  | C                    | 5.12719800  | 2.63619600  | -0.01862800 |
| C                    | -7.32175100 | -2.67816900 | 1.26429900  | C                    | 4.89181000  | 3.97187800  | -0.29374300 |
| C                    | -7.47516800 | -2.55270900 | -1.24662100 | C                    | 2.54531200  | 3.49728000  | -0.52994900 |
| H                    | -6.80453000 | -2.31785800 | 2.15820300  | H                    | 1.96624600  | 1.43826200  | -0.25572700 |
| H                    | -8.38495600 | -2.44049400 | 1.36189800  | H                    | 5.73619700  | 4.65321600  | -0.29329600 |
| H                    | -7.22388400 | -3.76697200 | 1.22412100  | H                    | 1.52931100  | 3.82299600  | -0.72777500 |
| H                    | -8.54107400 | -2.31413800 | -1.18976600 | H                    | 3.40659300  | 5.46100900  | -0.75642600 |
| H                    | -7.37916800 | -3.63930000 | -1.32771500 | C                    | 5.72951600  | -0.05208600 | 0.16363100  |
| H                    | -7.06893300 | -2.10126400 | -2.15629900 | C                    | 8.44293800  | -0.75156300 | -0.04420900 |
| <b>p-PXZ-DPS-PXZ</b> |             |             |             | C                    | 6.73172300  | 0.92956600  | 0.14784100  |
| S                    | -0.04181500 | -3.63992500 | -0.07657900 | C                    | 6.11199100  | -1.39135600 | 0.07347100  |
| O                    | 0.06219300  | -4.28647500 | -1.36879800 | C                    | 7.46219100  | -1.73623900 | -0.02317800 |
| O                    | -0.01459200 | -4.43008800 | 1.13726200  | C                    | 8.06905700  | 0.59216200  | 0.03684200  |
| C                    | -1.41647800 | -2.62883200 | -0.05931900 | H                    | 5.35247400  | -2.16517200 | 0.08822800  |
| C                    | -3.39601200 | -0.65696900 | -0.00333600 | H                    | 7.73575900  | -2.78428100 | -0.08382500 |
| C                    | -1.87302200 | -2.03509200 | -1.27621000 | H                    | 8.80277100  | 1.39142200  | 0.02789600  |
| C                    | -1.94658100 | -2.17860800 | 1.18930900  | H                    | 9.49171100  | -1.01656200 | -0.12115400 |
| C                    | -2.92335600 | -1.21727000 | 1.22054100  | O                    | 6.41663400  | 2.26487700  | 0.29396000  |
| C                    | -2.84944300 | -1.07295100 | -1.25408200 | <b>p-DPA-DPS-DPA</b> |             |             |             |
| H                    | -1.45474500 | -2.37361400 | -2.21863600 | S                    | -0.00008800 | 3.64424700  | -0.00002000 |
| H                    | -1.58482300 | -2.62584100 | 2.10951300  | O                    | 0.10496500  | 4.36207100  | 1.25228600  |
| H                    | -3.34955900 | -0.88819700 | 2.16376400  | O                    | -0.10518000 | 4.36211600  | -1.25229300 |
| H                    | -3.21994100 | -0.63528200 | -2.17640900 | C                    | 1.35041700  | 2.55795600  | -0.11396400 |
| C                    | 1.34838100  | -2.53561000 | 0.02889600  | C                    | 3.27853900  | 0.53842900  | -0.27798500 |
| C                    | 3.35364300  | -0.62769900 | 0.19610600  | C                    | 1.73425800  | 2.04928800  | -1.37624000 |
| C                    | 1.78578700  | -2.10335200 | 1.28253400  | C                    | 1.93308400  | 2.04008400  | 1.06582400  |
| C                    | 1.91157000  | -2.02334500 | -1.14388100 | C                    | 2.88547800  | 1.04694700  | 0.98489400  |
| C                    | 2.92076200  | -1.07095700 | -1.05660400 | C                    | 2.68900300  | 1.05877400  | -1.45705100 |
| C                    | 2.79218700  | -1.14428200 | 1.36286700  | H                    | 1.29445500  | 2.47009900  | -2.27453000 |
| H                    | 1.34547100  | -2.52869400 | 2.17854100  | H                    | 1.62864700  | 2.43898500  | 2.02794600  |
| H                    | 1.56594600  | -2.38829700 | -2.10561900 | H                    | 3.33794700  | 0.64416100  | 1.88592400  |
| H                    | 3.38293900  | -0.66558400 | -1.95266300 | H                    | 3.01481000  | 0.68638800  | -2.42347400 |
| H                    | 3.15669600  | -0.79358700 | 2.32348000  | C                    | -1.35053900 | 2.55788600  | 0.11391800  |
| N                    | -4.40882400 | 0.34093500  | 0.02505800  | C                    | -3.27860400 | 0.53830200  | 0.27793800  |
| C                    | -4.07072400 | 1.68134300  | 0.11355300  | C                    | -1.93356100 | 2.04035200  | -1.06584500 |
| C                    | -3.46377800 | 4.40276600  | 0.29514200  | C                    | -1.73405200 | 2.04889700  | 1.37616700  |
| C                    | -5.09226100 | 2.65744900  | 0.13780200  | C                    | -2.68875200 | 1.05834100  | 1.45697900  |
| C                    | -2.72672400 | 2.09901600  | 0.18318700  | C                    | -2.88593400 | 1.04719000  | -0.98491300 |

|                 |             |             |             |                  |             |             |             |
|-----------------|-------------|-------------|-------------|------------------|-------------|-------------|-------------|
| H               | -1.62939100 | 2.43951900  | -2.02794100 | H                | -4.62421800 | 2.35797900  | 0.00631600  |
| H               | -1.29402400 | 2.46948600  | 2.27445000  | S                | 0.00616400  | 4.15167000  | -0.03556800 |
| H               | -3.01427000 | 0.68567000  | 2.42338900  | O                | -0.02221500 | 4.93942300  | -1.26271700 |
| H               | -3.33865200 | 0.64463100  | -1.88592100 | O                | -0.00801700 | 4.97057700  | 1.17120400  |
| N               | 4.24371100  | -0.48078900 | -0.36197300 | C                | 1.23063200  | 2.94092800  | -0.02777000 |
| N               | -4.24369800 | -0.48098800 | 0.36193400  | C                | 2.88882200  | 0.74090400  | -0.01334200 |
| C               | 5.39981800  | -0.41581600 | 0.44281400  | C                | 0.65938700  | 1.61560300  | -0.00995600 |
| C               | 7.66335700  | -0.26572200 | 2.08073100  | C                | 2.61590900  | 3.14531000  | -0.03996200 |
| C               | 5.98441500  | 0.82980900  | 0.72642000  | C                | 3.46470400  | 2.05529700  | -0.03306200 |
| C               | 5.94898100  | -1.58477200 | 0.99698100  | C                | 1.50759200  | 0.52427000  | -0.00196400 |
| C               | 7.07550400  | -1.50307300 | 1.80483500  | H                | 3.02410300  | 4.15219500  | -0.05465400 |
| C               | 7.10979400  | 0.89565000  | 1.53941200  | H                | 4.54218900  | 2.17361900  | -0.04264200 |
| H               | 5.55731600  | 1.72977000  | 0.29618300  | H                | 1.12215700  | -0.49248200 | 0.01157200  |
| H               | 5.47917400  | -2.54299000 | 0.80006700  | N                | 3.76837000  | -0.38254400 | -0.00964500 |
| H               | 7.48981900  | -2.40994000 | 2.23346100  | N                | -4.01199100 | -0.20740000 | 0.02305100  |
| H               | 7.56047200  | 1.86114000  | 1.74504500  | C                | 4.18285600  | -0.94493700 | -1.20443600 |
| H               | 8.54094700  | -0.20800600 | 2.71581100  | C                | 5.05317000  | -2.15753800 | -3.56483300 |
| C               | 4.04126600  | -1.55771300 | -1.24695500 | C                | 5.04704400  | -2.06285200 | -1.17490000 |
| C               | 3.61658100  | -3.66423700 | -3.04154200 | C                | 3.76318000  | -0.43797900 | -2.45009100 |
| C               | 2.74103400  | -2.04242400 | -1.47370500 | C                | 4.19892800  | -1.04156200 | -3.61303800 |
| C               | 5.12552600  | -2.12812000 | -1.93726600 | C                | 5.47847800  | -2.66967800 | -2.34877000 |
| C               | 4.90776900  | -3.17573600 | -2.82171100 | H                | 3.10485800  | 0.42150300  | -2.47386700 |
| C               | 2.53942000  | -3.08941500 | -2.36526500 | H                | 3.87696300  | -0.64912000 | -4.57033800 |
| H               | 1.90623900  | -1.59963000 | -0.94034200 | H                | 6.13736000  | -3.52752400 | -2.28197900 |
| H               | 6.12480700  | -1.73365300 | -1.78423200 | H                | 5.38524700  | -2.62374000 | -4.48535000 |
| H               | 5.74981500  | -3.60505500 | -3.35498600 | C                | 4.23501700  | -0.89517900 | 1.18814300  |
| H               | 1.53326200  | -3.46257900 | -2.52728800 | C                | 5.21080100  | -2.00733600 | 3.55657400  |
| H               | 3.45265700  | -4.47999300 | -3.73758600 | C                | 3.86839300  | -0.33711900 | 2.42868200  |
| C               | -4.04094500 | -1.55809200 | 1.24662300  | C                | 5.09966800  | -2.01291200 | 1.16741300  |
| C               | -3.61559900 | -3.66495700 | 3.04065000  | C                | 5.58386100  | -2.56964100 | 2.34550700  |
| C               | -5.12497100 | -2.12873800 | 1.93710200  | C                | 4.35599600  | -0.89145800 | 3.59562900  |
| C               | -2.74061300 | -2.04272900 | 1.47292400  | H                | 3.20918700  | 0.52184500  | 2.44519900  |
| C               | -2.53867300 | -3.08991000 | 2.36418900  | H                | 6.24099600  | -3.42937200 | 2.28594200  |
| C               | -4.90688400 | -3.17651000 | 2.82128400  | H                | 4.07487700  | -0.45988900 | 4.54893000  |
| H               | -6.12432700 | -1.73432700 | 1.78440800  | H                | 5.58434800  | -2.43413100 | 4.48031700  |
| H               | -1.90600000 | -1.59972700 | 0.93944600  | C                | -4.28109100 | -0.88590200 | -1.17955200 |
| H               | -1.53243900 | -3.46302300 | 2.52586300  | C                | -4.92264700 | -2.29308000 | -3.52863700 |
| H               | -5.74874700 | -3.60600100 | 3.35470800  | C                | -5.10956400 | -2.01864900 | -1.14355800 |
| H               | -3.45141400 | -4.48083900 | 3.73648400  | C                | -3.78260700 | -0.47057300 | -2.41619300 |
| C               | -5.40003900 | -0.41590100 | -0.44250700 | C                | -4.10814400 | -1.16763700 | -3.58258400 |
| C               | -7.66407800 | -0.26560700 | -2.07970700 | C                | -5.42117400 | -2.72068400 | -2.29507400 |
| C               | -5.94926800 | -1.58477000 | -0.99678700 | H                | -3.14671600 | 0.40626800  | -2.46692800 |
| C               | -5.98482800 | 0.82974100  | -0.72562500 | H                | -3.71580700 | -0.81943500 | -4.53225300 |
| C               | -7.11044600 | 0.89568300  | -1.53828000 | H                | -6.06432300 | -3.59062500 | -2.21084300 |
| C               | -7.07604300 | -1.50297600 | -1.80427900 | H                | -5.17594300 | -2.83772000 | -4.43154300 |
| H               | -5.47932600 | -2.54299600 | -0.80022700 | C                | -4.26139800 | -0.88480500 | 1.23038400  |
| H               | -5.55767000 | 1.72963400  | -0.29530500 | C                | -4.86444300 | -2.29051500 | 3.59054800  |
| H               | -7.56126500 | 1.86118400  | -1.74355200 | C                | -3.74409100 | -0.46778000 | 2.45865400  |
| H               | -7.49041600 | -2.40977600 | -2.23298900 | C                | -5.08996800 | -2.01790100 | 1.20860600  |
| H               | -8.54186500 | -0.20781400 | -2.71450800 | C                | -5.38247300 | -2.71931000 | 2.36548600  |
| <b>DBTO-PXZ</b> |             |             |             | C                | -4.05032000 | -1.16419800 | 3.63062700  |
| C               | -0.78947800 | 1.64659400  | -0.00312500 | H                | -3.10858100 | 0.40988000  | 2.49857300  |
| C               | -3.55277400 | 2.18997700  | 0.00362700  | H                | -6.02646600 | -3.58962500 | 2.29224900  |
| C               | -1.29440900 | 2.96455500  | -0.01406200 | H                | -3.64335500 | -0.81479900 | 4.57367200  |
| C               | -1.70784000 | 0.58860700  | 0.01049700  | H                | -5.10271200 | -2.83477400 | 4.49775700  |
| C               | -3.06779200 | 0.87018900  | 0.01343800  | O                | 5.48129700  | -2.58136100 | -0.00133900 |
| C               | -2.65467700 | 3.25206100  | -0.01068300 | O                | -5.68369400 | -2.44113800 | 0.03751100  |
| H               | -1.37770300 | -0.44714000 | 0.01783800  | <b>DBTO-DMAC</b> |             |             |             |
| H               | -3.00600900 | 4.27953800  | -0.01933800 | C                | 0.74290400  | 1.84024900  | -0.00873500 |



|   |             |             |             |                 |             |             |             |
|---|-------------|-------------|-------------|-----------------|-------------|-------------|-------------|
| C | 3.54377500  | 2.33256900  | -0.02733000 | H               | 5.54596600  | -1.90828300 | 4.64876000  |
| C | 1.29326700  | 3.17511400  | -0.02672900 | C               | -5.77342800 | -2.34345000 | 0.02357600  |
| C | 1.61886200  | 0.76562300  | 0.00211600  | C               | -7.31533000 | -2.26239900 | 0.02149600  |
| C | 2.98934700  | 1.01014300  | -0.00702600 | H               | -7.73294900 | -2.74848100 | 0.90773800  |
| C | 2.66684300  | 3.40585400  | -0.03680800 | H               | -7.73120200 | -2.76078600 | -0.85871000 |
| H | 1.25377900  | -0.25887800 | 0.01567900  | H               | -7.64257700 | -1.21884400 | 0.01389500  |
| H | 3.05126900  | 4.42217900  | -0.05215900 | C               | -5.34182800 | -3.82614300 | 0.03446400  |
| H | 4.61822700  | 2.47315700  | -0.03532100 | H               | -5.72658000 | -4.33616400 | 0.92265800  |
| S | 0.04053400  | 4.37075300  | -0.03845400 | H               | -4.25082400 | -3.90643500 | 0.03593800  |
| O | 0.01405400  | 5.17395300  | 1.17267800  | H               | -5.72509800 | -4.34876800 | -0.84702800 |
| O | 0.00819400  | 5.14271500  | -1.26966200 | H               | 6.24062000  | -3.07645800 | -2.56053100 |
| C | -1.23365500 | 3.15261300  | -0.02058000 | C               | 5.75193100  | -2.37787900 | 0.00927300  |
| C | -2.96539300 | 1.01995900  | 0.00188200  | C               | 5.32003700  | -3.86413300 | 0.04316300  |
| C | -0.70197600 | 1.84461300  | -0.00641300 | H               | 5.72413200  | -4.35790400 | 0.92999600  |
| C | -2.59957800 | 3.41064400  | -0.02280000 | H               | 5.69619800  | -4.39014900 | -0.83741300 |
| C | -3.47683100 | 2.33240300  | -0.01115000 | H               | 4.23055300  | -3.95034100 | 0.06184500  |
| C | -1.60313000 | 0.76741900  | 0.00516300  | C               | 7.29739000  | -2.28793600 | -0.01763200 |
| H | -2.96797800 | 4.43221000  | -0.03403200 | H               | 7.72235300  | -2.76515800 | 0.86841800  |
| H | -4.55174900 | 2.47972900  | -0.01311200 | H               | 7.62357900  | -1.24497200 | -0.04245300 |
| H | -1.25732600 | -0.26267600 | 0.01508500  | H               | 7.69352400  | -2.79819400 | -0.89861200 |
| N | -3.87977200 | -0.08311200 | 0.00944100  |                 |             |             |             |
| N | 3.89712100  | -0.10099000 | -0.00174200 |                 |             |             |             |
| C | -4.33632400 | -0.58174100 | 1.23527500  | <b>TXO2-PXZ</b> |             |             |             |
| C | -5.20763200 | -1.55237300 | 3.72463500  | C               | 1.31063100  | -1.14649000 | 0.00655000  |
| C | -5.23873200 | -1.66004700 | 1.28076700  | C               | 3.56871800  | -0.87104000 | 1.76364400  |
| C | -3.88627900 | -0.00069000 | 2.43606800  | C               | 1.34597700  | -1.74792200 | 1.31715000  |
| C | -4.31868400 | -0.48131200 | 3.66422500  | C               | 2.41056100  | -0.42164700 | -0.38858500 |
| C | -5.65063800 | -2.12070700 | 2.53527400  | C               | 3.55263200  | -0.29465500 | 0.45858800  |
| H | -3.19640100 | 0.83396900  | 2.40235800  | C               | 2.47051000  | -1.57504000 | 2.17740400  |
| H | -3.95737900 | -0.01173200 | 4.57386900  | H               | 2.43570300  | 0.08159100  | -1.34828200 |
| H | -6.34418300 | -2.95571100 | 2.58311900  | H               | 2.43366600  | -2.00325600 | 3.17349300  |
| H | -5.55247700 | -1.93767800 | 4.67825800  | H               | 4.42889700  | -0.73752500 | 2.41203100  |
| C | -4.33369800 | -0.59928700 | -1.21019600 | S               | 0.01700900  | -2.63587400 | 1.91565200  |
| C | -5.19999300 | -1.60560800 | -3.68723500 | O               | -0.06512800 | -3.99904700 | 1.41508600  |
| C | -3.88075700 | -0.03594300 | -2.41837800 | O               | -0.05062500 | -2.51049100 | 3.36096200  |
| C | -5.23624000 | -1.67796200 | -1.24213000 | C               | -1.32561800 | -1.72963300 | 1.20388900  |
| C | -5.64566500 | -2.15655900 | -2.49071800 | C               | -3.46834200 | -0.31646600 | 0.21206600  |
| C | -4.31066400 | -0.53419900 | -3.64035600 | C               | -1.19728400 | -1.15138500 | -0.07104600 |
| H | -3.19052700 | 0.79878500  | -2.39554000 | C               | -2.48089400 | -1.60259400 | 1.97412200  |
| H | -6.33934100 | -2.99198700 | -2.52797500 | C               | -3.56871000 | -0.89887000 | 1.47389800  |
| H | -3.94711400 | -0.07798400 | -4.55589300 | C               | -2.30279300 | -0.43460600 | -0.54205300 |
| H | -5.54296300 | -2.00450200 | -4.63593100 | H               | -2.50520200 | -2.04818800 | 2.96343000  |
| C | 4.31434900  | -0.63182400 | -1.21334900 | H               | -4.48248900 | -0.78828100 | 2.05044500  |
| C | 5.08972800  | -1.66302600 | -3.67996200 | H               | -2.28644000 | 0.05937000  | -1.50637200 |
| C | 5.20284600  | -1.73456300 | -1.24947300 | C               | 0.08407000  | -1.31903600 | -0.90251800 |
| C | 3.83243800  | -0.05148300 | -2.41281100 | C               | 0.10735500  | -0.33169000 | -2.07578100 |
| C | 4.22199800  | -0.56729300 | -3.63209000 | H               | 1.00669300  | -0.48724100 | -2.67569200 |
| C | 5.56692800  | -2.22818600 | -2.49913300 | H               | 0.07979000  | 0.71070100  | -1.74364700 |
| H | 3.16354000  | 0.79702200  | -2.36230500 | H               | -0.74022300 | -0.51354300 | -2.74056200 |
| H | 3.85169100  | -0.11889600 | -4.54665600 | C               | 0.09666200  | -2.74038400 | -1.52616000 |
| H | 5.39635300  | -2.07562900 | -4.63493500 | H               | 0.09963700  | -3.52428300 | -0.76948600 |
| C | 4.35227700  | -0.58926200 | 1.21403700  | H               | 0.99277300  | -2.84492600 | -2.14659700 |
| C | 5.20796000  | -1.53059200 | 3.68990400  | H               | -0.78644000 | -2.86742500 | -2.16129000 |
| C | 3.90646700  | 0.03243800  | 2.40671600  | N               | 4.69515400  | 0.40020400  | -0.02184500 |
| C | 5.24357800  | -1.68925300 | 1.26114100  | C               | 4.82299900  | 1.76619200  | 0.17272500  |
| C | 5.64845900  | -2.13733400 | 2.51544400  | C               | 5.14329100  | 4.51942300  | 0.52436100  |
| C | 4.33585000  | -0.43893900 | 3.63067000  | C               | 5.96461200  | 2.43719400  | -0.32010900 |
| H | 3.23353500  | 0.87712500  | 2.34694700  | C               | 3.83660100  | 2.50785100  | 0.85245300  |
| H | 6.32532300  | -2.98240700 | 2.58573800  | C               | 4.00179300  | 3.86812800  | 1.02290900  |
| H | 3.99336100  | 0.04106500  | 4.54002600  | C               | 6.12555300  | 3.80708700  | -0.14674700 |
|   |             |             |             | H               | 2.96500300  | 1.98741800  | 1.22955200  |



|   |             |            |             |   |             |             |             |
|---|-------------|------------|-------------|---|-------------|-------------|-------------|
| C | -7.00335200 | 1.74041600 | -0.81217400 | N | -2.13714100 | -0.05280900 | 0.28948800  |
| C | -8.33559300 | 1.85454600 | -0.03244600 | C | -2.97091600 | -1.12788900 | 0.01795900  |
| H | -8.54993400 | 2.89911000 | 0.20569300  | C | -4.58235300 | -3.32591800 | -0.54556300 |
| H | -8.28682300 | 1.28717800 | 0.90063800  | C | -4.35260100 | -0.92467500 | -0.22012800 |
| H | -9.16281400 | 1.46797300 | -0.63254800 | C | -2.41354200 | -2.42972300 | -0.02168700 |
| C | -7.10073700 | 2.55204200 | -2.12621600 | C | -3.21880000 | -3.51529500 | -0.30024700 |
| H | -7.30207400 | 3.60415400 | -1.91120600 | C | -5.12895200 | -2.04477500 | -0.50302400 |
| H | -7.91470200 | 2.17361600 | -2.74907400 | C | -2.61230300 | 1.24817100  | 0.37806400  |
| H | -6.16814000 | 2.48410700 | -2.69244800 | C | -3.49382200 | 3.88273200  | 0.55034500  |

**Cz-TTR**

|   |             |             |             |
|---|-------------|-------------|-------------|
| H | 0.94628000  | 1.37024000  | 2.88325700  |
| C | 0.58507900  | 0.83181500  | 2.01255700  |
| C | -0.28006300 | -0.51997400 | -0.30786700 |
| C | 1.50954000  | 0.11158700  | 1.24178000  |
| C | -0.75443200 | 0.86262800  | 1.68461300  |
| C | -1.17979100 | 0.16076300  | 0.50332200  |
| C | 1.05652500  | -0.58145000 | 0.05448900  |
| H | -1.47830100 | 1.38009700  | 2.30275700  |
| H | -0.61202900 | -0.99855800 | -1.22499800 |
| S | 3.18177300  | 0.15078800  | 1.66125500  |
| O | 3.43655900  | 1.29924000  | 2.50594000  |
| O | 3.65131600  | -1.12977500 | 2.13999900  |
| S | 2.16508600  | -1.41285500 | -0.98993600 |
| O | 2.66576800  | -2.61920000 | -0.37422000 |
| O | 1.57396100  | -1.53899700 | -2.30499800 |
| C | 3.48753900  | -0.23808300 | -1.07277100 |
| C | 5.53143400  | 1.64308500  | -1.25683900 |
| C | 3.92677300  | 0.44067200  | 0.07779300  |
| C | 4.06023700  | 0.03913400  | -2.31168400 |
| C | 5.09473200  | 0.96751000  | -2.39867700 |
| C | 4.93732500  | 1.39462700  | -0.02205100 |
| H | 3.68581000  | -0.47089300 | -3.19302000 |
| H | 5.24382600  | 1.93280200  | 0.86871500  |
| H | 6.32899700  | 2.37464300  | -1.32975900 |
| H | 5.55114400  | 1.17295900  | -3.36090800 |
| N | -2.55809000 | 0.15430000  | 0.18239400  |
| C | -3.38612900 | -0.95581600 | 0.18913000  |
| C | -5.36936600 | -2.84416100 | 0.06555700  |
| C | -3.04207300 | -2.27916200 | 0.47546200  |
| C | -4.70328600 | -0.55268700 | -0.14724000 |
| C | -5.70229600 | -1.50157200 | -0.21102000 |
| C | -4.06883200 | -3.22231500 | 0.40458700  |
| H | -2.02774900 | -2.55356100 | 0.74267100  |
| H | -6.72177400 | -1.23183800 | -0.46529600 |
| H | -3.85084600 | -4.26234100 | 0.61733800  |
| H | -6.14601800 | -3.59929500 | 0.01617000  |
| C | -3.29690500 | 1.27481400  | -0.13794700 |
| C | -5.12855700 | 3.20359700  | -0.78938500 |
| C | -4.64883100 | 0.89862900  | -0.34641000 |
| C | -2.83818400 | 2.59023300  | -0.26172000 |
| C | -3.79187000 | 3.55508700  | -0.58948100 |
| C | -5.57200300 | 1.86846700  | -0.67452500 |
| H | -1.79274100 | 2.83696200  | -0.11438000 |
| H | -3.48852500 | 4.59010400  | -0.69511500 |
| H | -6.61473700 | 1.62226700  | -0.84353000 |
| H | -5.84668400 | 3.97466800  | -1.04555800 |

**DMAC-TTR**

|   |             |             |             |
|---|-------------|-------------|-------------|
| C | -2.13714100 | -0.05280900 | 0.28948800  |
| C | -2.97091600 | -1.12788900 | 0.01795900  |
| C | -4.58235300 | -3.32591800 | -0.54556300 |
| C | -4.35260100 | -0.92467500 | -0.22012800 |
| C | -2.41354200 | -2.42972300 | -0.02168700 |
| C | -3.21880000 | -3.51529500 | -0.30024700 |
| C | -5.12895200 | -2.04477500 | -0.50302400 |
| C | -2.61230300 | 1.24817100  | 0.37806400  |
| C | -3.49382200 | 3.88273200  | 0.55034500  |
| C | -1.70131000 | 2.28621400  | 0.69237100  |
| C | -3.98176000 | 1.53107400  | 0.15358200  |
| C | -4.38844300 | 2.85941200  | 0.24410000  |
| C | -2.14566500 | 3.59009400  | 0.77781400  |
| C | -4.99063900 | 0.45050800  | -0.18433100 |
| C | -5.60160000 | 0.75453300  | -1.57427300 |
| C | -6.10769300 | 0.45567800  | 0.88756200  |
| H | -5.21965700 | -4.17432800 | -0.76987600 |
| H | -1.35734600 | -2.56517500 | 0.16754600  |
| H | -2.78713100 | -4.50893000 | -0.32960200 |
| H | -6.18914400 | -1.92209100 | -0.69838100 |
| H | -3.84867900 | 4.90576700  | 0.61126100  |
| H | -0.66069000 | 2.04863700  | 0.86616900  |
| H | -5.42953600 | 3.11031700  | 0.06970400  |
| H | -1.44458700 | 4.38052100  | 1.01926100  |
| H | -6.35020700 | 0.00234400  | -1.83383500 |
| H | -4.82672300 | 0.75563000  | -2.34517700 |
| H | -6.09043000 | 1.73162500  | -1.56979400 |
| H | -5.69452500 | 0.24422700  | 1.87718500  |
| H | -6.60367900 | 1.42845300  | 0.91766000  |
| H | -6.86184800 | -0.29997000 | 0.65642500  |
| C | -0.74484700 | -0.29969400 | 0.51781500  |
| C | 1.95559100  | -0.80956400 | 1.00061800  |
| C | -0.30104400 | -0.55435700 | 1.85904200  |
| C | 0.13807100  | -0.26419700 | -0.55125900 |
| C | 1.47883600  | -0.54140400 | -0.34151800 |
| C | 1.04596800  | -0.77819900 | 2.06640800  |
| H | -1.00737700 | -0.54697700 | 2.68054700  |
| H | -0.20666000 | -0.01912700 | -1.55224000 |
| H | 1.42605400  | -0.93429500 | 3.07130000  |
| S | 3.63452800  | -1.04774600 | 1.31512800  |
| O | 3.90484400  | -0.74363200 | 2.70425400  |
| O | 4.11004400  | -2.31086300 | 0.80624500  |
| S | 2.56539400  | -0.45014500 | -1.69327800 |
| O | 3.07162500  | -1.75063000 | -2.05195700 |
| O | 1.95018600  | 0.34065300  | -2.73780400 |
| C | 3.89208800  | 0.49111400  | -0.98661500 |
| C | 5.94294400  | 2.02963600  | 0.09628600  |
| C | 4.35267600  | 0.23403000  | 0.31557400  |
| C | 4.44649100  | 1.52643400  | -1.73494900 |
| C | 5.48527500  | 2.28291000  | -1.19858300 |
| C | 5.36611200  | 1.01868500  | 0.86080500  |
| H | 4.05326900  | 1.72748900  | -2.72603500 |
| H | 5.92944100  | 3.07852700  | -1.78727400 |
| H | 5.68639700  | 0.82734000  | 1.87973300  |
| H | 6.74411800  | 2.62848200  | 0.51648700  |

**PXZ-TTR**

|   |             |             |             |
|---|-------------|-------------|-------------|
| H | 0.99718300  | -0.73707900 | 3.10744200  |
| C | 0.63425100  | -0.62534800 | 2.09042200  |
| C | -0.22417700 | -0.23178500 | -0.56667900 |

|                |             |             |             |                  |             |             |             |
|----------------|-------------|-------------|-------------|------------------|-------------|-------------|-------------|
| C              | 1.55735500  | -0.73233300 | 1.04088000  | O                | -2.82982800 | -1.85512100 | -1.98313000 |
| C              | -0.70399500 | -0.38321300 | 1.85091100  | O                | -1.74291500 | 0.22235100  | -2.76057300 |
| C              | -1.12284900 | -0.19212100 | 0.49095000  | C                | -1.24153500 | -0.55345300 | -0.33597300 |
| C              | 1.10579100  | -0.52620400 | -0.32095300 | C                | 0.55268900  | -0.45311700 | 1.85133100  |
| H              | -1.42163500 | -0.31902400 | 2.66000100  | C                | -1.70349300 | -0.77708400 | 1.01946300  |
| H              | -0.54929100 | -0.03637300 | -1.58495900 | C                | 0.09584200  | -0.25837400 | -0.56233300 |
| S              | 3.22505200  | -0.99691000 | 1.39237700  | C                | 0.98194300  | -0.23742200 | 0.50084100  |
| O              | 3.48560500  | -0.61908100 | 2.76506400  | C                | -0.79018200 | -0.69231300 | 2.07712000  |
| O              | 3.67015300  | -2.30056100 | 0.96505000  | H                | 0.43174400  | -0.04609100 | -1.57370800 |
| S              | 2.21263500  | -0.54739700 | -1.65946900 | H                | -1.16240500 | -0.81863500 | 3.08906000  |
| O              | 2.68562500  | -1.88151500 | -1.92882700 | H                | 1.26418600  | -0.40544400 | 2.66712600  |
| O              | 1.63381000  | 0.19461500  | -2.75892600 | N                | 2.37253400  | 0.02770400  | 0.25557300  |
| C              | 3.55666500  | 0.39709900  | -0.99126900 | C                | 3.20177800  | -1.06047500 | 0.01569400  |
| C              | 5.64208900  | 1.93204200  | 0.02741100  | C                | 4.82532200  | -3.30766900 | -0.49904800 |
| C              | 3.99303800  | 0.20309400  | 0.32996800  | C                | 2.66140800  | -2.36833600 | 0.04654400  |
| C              | 4.15211400  | 1.36846600  | -1.79163900 | C                | 4.58222700  | -0.91618900 | -0.27347000 |
| C              | 5.20762800  | 2.12313700  | -1.28587300 | C                | 5.37798000  | -2.04356900 | -0.53148000 |
| C              | 5.02492300  | 0.98589300  | 0.84194300  | C                | 3.45974300  | -3.46350000 | -0.20411800 |
| H              | 3.77767500  | 1.52266200  | -2.79829300 | H                | 1.61188800  | -2.50184200 | 0.26922200  |
| H              | 5.32804400  | 0.84434900  | 1.87414600  | H                | 6.43092200  | -1.90442500 | -0.75627700 |
| H              | 6.45707800  | 2.52926000  | 0.42260400  | H                | 3.02076000  | -4.45403600 | -0.17389600 |
| H              | 5.68347700  | 2.86887900  | -1.91376700 | H                | 5.44501300  | -4.17408400 | -0.69980700 |
| N              | -2.50634000 | 0.05727600  | 0.22960100  | C                | 2.79882900  | 1.34771600  | 0.31874300  |
| C              | -3.36383200 | -0.99778700 | -0.02306700 | C                | 3.59525700  | 4.05055000  | 0.43561000  |
| C              | -5.16652300 | -3.06172900 | -0.56855100 | C                | 1.86932200  | 2.36520300  | 0.64195100  |
| C              | -2.91482600 | -2.33342100 | -0.05164400 | C                | 4.14021000  | 1.72790300  | 0.06222800  |
| C              | -4.73014100 | -0.72998800 | -0.26928200 | C                | 4.52190300  | 3.07767300  | 0.12073600  |
| C              | -5.62805200 | -1.75515300 | -0.54338400 | C                | 2.26404700  | 3.68443600  | 0.69938300  |
| C              | -3.81186800 | -3.34731500 | -0.32042800 | H                | 0.84244300  | 2.09605200  | 0.84625800  |
| H              | -1.86943300 | -2.54226500 | 0.13718400  | H                | 5.55450500  | 3.34154500  | -0.08551000 |
| H              | -6.66560300 | -1.50409200 | -0.73062700 | H                | 1.53265500  | 4.44362500  | 0.95140900  |
| H              | -3.46344000 | -4.37305100 | -0.34239000 | H                | 3.89683000  | 5.09079400  | 0.47910500  |
| H              | -5.85841000 | -3.86840800 | -0.78224400 | S                | 5.38077400  | 0.60703300  | -0.34735000 |
| C              | -2.99991000 | 1.34791400  | 0.27320800  |                  |             |             |             |
| C              | -4.08467800 | 3.92233100  | 0.32769300  |                  |             |             |             |
| C              | -4.37411800 | 1.56794200  | 0.02488900  | <b>Cz-Ph-TTR</b> |             |             |             |
| C              | -2.17247600 | 2.45301000  | 0.55623700  | H                | 3.18533300  | 1.97689500  | 2.61146400  |
| C              | -2.71615900 | 3.72150500  | 0.58220100  | C                | 2.74968400  | 1.27133800  | 1.91156100  |
| C              | -4.91525100 | 2.84836900  | 0.04901500  | C                | 1.67170500  | -0.51639100 | 0.04659000  |
| H              | -1.12072000 | 2.28555900  | 0.75054900  | C                | 3.60637600  | 0.41388800  | 1.19909500  |
| H              | -2.07800500 | 4.56952600  | 0.80077300  | C                | 1.38576300  | 1.21289900  | 1.73358800  |
| H              | -5.97326600 | 2.97137500  | -0.15139200 | C                | 0.78368600  | 0.30490100  | 0.79749600  |
| H              | -4.49690300 | 4.92470900  | 0.34922200  | C                | 3.02979300  | -0.47964700 | 0.25723900  |
| O              | -5.20961500 | 0.53723200  | -0.24857900 | H                | 0.76711000  | 1.86261100  | 2.34000600  |
|                |             |             |             | H                | 1.30783200  | -1.16272100 | -0.74393600 |
|                |             |             |             | S                | 5.32306900  | 0.51998900  | 1.43718400  |
| <b>PTZ-TTR</b> |             |             |             | O                | 5.63649000  | 1.82871800  | 1.96295300  |
| H              | -5.45416700 | 0.83097800  | 1.86513400  | O                | 5.83428300  | -0.62963700 | 2.13896200  |
| C              | -5.14289100 | 0.98935000  | 0.83780400  | S                | 4.04124400  | -1.53987100 | -0.72761800 |
| C              | -4.24691600 | 1.41414400  | -1.78127100 | O                | 4.56788400  | -2.60340900 | 0.08522600  |
| C              | -4.12204700 | 0.19894800  | 0.31450100  | O                | 3.32256400  | -1.88487900 | -1.93039900 |
| C              | -5.73863500 | 1.96345300  | 0.04103100  | C                | 5.36791200  | -0.44736700 | -1.17093800 |
| C              | -5.29225500 | 2.17556500  | -1.26553300 | C                | 7.43728000  | 1.24938600  | -1.91840200 |
| C              | -3.67334400 | 0.41381800  | -1.00002500 | C                | 5.91799600  | 0.44178600  | -0.23628000 |
| H              | -6.54565000 | 2.56599800  | 0.44438000  | C                | 5.83936400  | -0.47679400 | -2.47819800 |
| H              | -5.75117700 | 2.94299400  | -1.87978000 | C                | 6.88975300  | 0.36353700  | -2.84590900 |
| H              | -3.86334400 | 1.58397400  | -2.78195400 | C                | 6.94274400  | 1.30300100  | -0.61618400 |
| S              | -3.37741100 | -1.03202400 | 1.35566600  | H                | 5.37566000  | -1.14833600 | -3.19317600 |
| O              | -3.64347500 | -0.68106900 | 2.73449200  | H                | 7.33558100  | 2.00738700  | 0.10951300  |
| O              | -3.82915200 | -2.32313600 | 0.89861300  | H                | 8.24429000  | 1.91256500  | -2.21144200 |
| S              | -2.33849900 | -0.53457600 | -1.67977700 | H                | 7.26837900  | 0.33552800  | -3.86197000 |

|   |             |             |             |
|---|-------------|-------------|-------------|
| C | -0.63747800 | 0.24426800  | 0.59449100  |
| C | -3.45020700 | 0.13507900  | 0.19762100  |
| C | -1.25402900 | -0.81717800 | -0.14226400 |
| C | -1.51391000 | 1.24506000  | 1.12548100  |
| C | -2.87181000 | 1.20228300  | 0.92629800  |
| C | -2.61131300 | -0.88083800 | -0.32977800 |
| H | -0.64506200 | -1.60776400 | -0.56420600 |
| H | -1.10894300 | 2.07135100  | 1.69649800  |
| H | -3.51414600 | 1.95740800  | 1.36869900  |
| H | -3.04536200 | -1.67891800 | -0.92363500 |
| N | -4.82808600 | 0.08120800  | 0.00171600  |
| C | -5.63518200 | 1.14595400  | -0.40458600 |
| C | -7.59824300 | 2.89744900  | -1.22347100 |
| C | -6.97661400 | 0.70486100  | -0.48429700 |
| C | -5.25085100 | 2.43781700  | -0.77361700 |
| C | -6.26167800 | 3.30998600  | -1.17237300 |
| C | -7.96490600 | 1.58614300  | -0.89262700 |
| H | -4.21176100 | 2.74546300  | -0.77013100 |
| H | -6.00310800 | 4.32294000  | -1.46012800 |
| H | -8.99967800 | 1.26759500  | -0.96652000 |
| H | -8.36072500 | 3.59993700  | -1.54190000 |
| C | -5.63346600 | -1.04546700 | 0.18033300  |
| C | -7.60909700 | -2.94741900 | 0.44596200  |
| C | -5.26978300 | -2.30876300 | 0.65451800  |
| C | -6.97420600 | -0.70687200 | -0.11701700 |
| C | -7.96785500 | -1.66374700 | 0.01334500  |
| C | -6.28308500 | -3.25844600 | 0.76854300  |
| H | -4.25001700 | -2.53822900 | 0.94059500  |
| H | -9.00406100 | -1.42443900 | -0.20282200 |
| H | -6.03839500 | -4.25217400 | 1.12669400  |
| H | -8.37518600 | -3.70803600 | 0.55006600  |

**DMAC-Ph-TTR**

|   |             |             |             |
|---|-------------|-------------|-------------|
| H | 7.99353300  | 0.56476100  | -1.81033300 |
| C | 7.59473700  | 0.96986300  | -0.88618000 |
| C | 6.47566000  | 2.02276200  | 1.45577900  |
| C | 6.51927000  | 0.33220800  | -0.27818500 |
| C | 8.13018100  | 2.11852800  | -0.30430900 |
| C | 7.57460000  | 2.64290100  | 0.86158100  |
| C | 5.96190500  | 0.86056700  | 0.89277900  |
| H | 8.97552700  | 2.61147800  | -0.77275800 |
| H | 7.98515400  | 3.54447300  | 1.30341000  |
| H | 6.00631800  | 2.43247700  | 2.34396200  |
| S | 5.87902200  | -1.15027900 | -1.02885200 |
| O | 6.21878900  | -1.11907800 | -2.43333200 |
| O | 6.35883400  | -2.26300300 | -0.24760600 |
| S | 4.58133400  | 0.07527200  | 1.69097300  |
| O | 5.05532700  | -1.10194200 | 2.36994800  |
| O | 3.88742800  | 1.07849200  | 2.46243300  |
| C | 3.58278200  | -0.39283600 | 0.31395300  |
| C | 1.95103800  | -1.06971500 | -1.82157400 |
| C | 4.16994000  | -0.92602600 | -0.86235400 |
| C | 2.22744000  | -0.19338900 | 0.41787400  |
| C | 1.33678200  | -0.55875600 | -0.63270900 |
| C | 3.31486800  | -1.23211500 | -1.93412300 |
| H | 1.86401500  | 0.28445000  | 1.31999000  |
| H | 3.74904400  | -1.60578900 | -2.85580400 |
| H | 1.34073000  | -1.35276200 | -2.67022500 |
| C | -0.08553500 | -0.39296600 | -0.50118000 |
| C | -2.89574000 | -0.09652600 | -0.24469900 |

|   |             |             |             |
|---|-------------|-------------|-------------|
| C | -0.70125100 | -0.06543900 | 0.74634500  |
| C | -0.96990600 | -0.56089400 | -1.61279600 |
| C | -2.33472100 | -0.41751400 | -1.49372300 |
| C | -2.06398300 | 0.07869300  | 0.87881300  |
| H | -0.09622400 | 0.05025000  | 1.63819600  |
| H | -0.57222400 | -0.79100800 | -2.59414800 |
| H | -2.98030800 | -0.54564100 | -2.35844400 |
| H | -2.50273200 | 0.31383300  | 1.84455500  |
| N | -4.31665700 | 0.03008800  | -0.10806200 |
| C | -5.05629600 | -1.08465900 | 0.25810700  |
| C | -6.47772700 | -3.36203400 | 0.99802800  |
| C | -4.37862600 | -2.31010600 | 0.47711900  |
| C | -6.46275100 | -1.00011600 | 0.40905600  |
| C | -7.14230900 | -2.15699900 | 0.77988200  |
| C | -5.08922500 | -3.43432100 | 0.84389300  |
| H | -3.30485100 | -2.35403600 | 0.35377500  |
| H | -8.21966600 | -2.12449500 | 0.90343300  |
| H | -4.56579700 | -4.36856100 | 1.01060500  |
| H | -7.04166400 | -4.24224700 | 1.28654300  |
| C | -4.90819200 | 1.26259500  | -0.34346600 |
| C | -6.02786100 | 3.76381200  | -0.83705600 |
| C | -6.31019000 | 1.42607900  | -0.21960500 |
| C | -4.08295300 | 2.35489000  | -0.70904600 |
| C | -4.64443500 | 3.59137700  | -0.95268700 |
| C | -6.83708900 | 2.68935100  | -0.47403500 |
| H | -3.01437000 | 2.20867700  | -0.79258000 |
| H | -4.00860700 | 4.42358200  | -1.23153900 |
| H | -7.90703900 | 2.84713700  | -0.38720300 |
| H | -6.47520400 | 4.73325800  | -1.02718900 |
| C | -7.22911200 | 0.28806400  | 0.18006600  |
| C | -7.96198000 | 0.67354500  | 1.48856900  |
| H | -7.24676500 | 0.83863400  | 2.29844600  |
| H | -8.64986300 | -0.12070000 | 1.78763300  |
| H | -8.54292600 | 1.58743900  | 1.34476500  |
| C | -8.26620000 | 0.06006000  | -0.94669600 |
| H | -8.84815900 | 0.96838300  | -1.11859400 |
| H | -8.95968100 | -0.73753000 | -0.67032700 |
| H | -7.76907800 | -0.21762000 | -1.87975400 |

**PXZ-Ph-TTR**

|   |            |             |             |
|---|------------|-------------|-------------|
| H | 7.53518800 | 0.54850500  | -1.83519600 |
| C | 7.14228300 | 0.95440900  | -0.90888000 |
| C | 6.03812100 | 2.00944200  | 1.43926100  |
| C | 6.07052400 | 0.31748900  | -0.29362200 |
| C | 7.68159800 | 2.10342700  | -0.33120700 |
| C | 7.13342500 | 2.62888500  | 0.83767200  |
| C | 5.52068900 | 0.84691500  | 0.88041100  |
| H | 8.52411100 | 2.59579400  | -0.80532100 |
| H | 7.54696100 | 3.53071600  | 1.27617000  |
| H | 5.57445100 | 2.41997900  | 2.33003800  |
| S | 5.42498900 | -1.16538700 | -1.03909400 |
| O | 5.75549000 | -1.13508000 | -2.44571600 |
| O | 5.90824200 | -2.27807100 | -0.26013200 |
| S | 4.14512400 | 0.06256300  | 1.68796200  |
| O | 4.62289500 | -1.11480500 | 2.36383600  |
| O | 3.45645400 | 1.06626400  | 2.46338300  |
| C | 3.13741000 | -0.40525400 | 0.31736200  |
| C | 1.49206000 | -1.08217300 | -1.80775400 |
| C | 3.71657000 | -0.94023900 | -0.86188000 |
| C | 1.78305200 | -0.20270500 | 0.42862400  |

|   |             |             |             |   |             |             |             |
|---|-------------|-------------|-------------|---|-------------|-------------|-------------|
| C | 0.88612000  | -0.56663300 | -0.61688500 | H | 5.65605900  | 2.71213100  | 1.91856100  |
| C | 2.85504700  | -1.24714100 | -1.92798800 | H | 7.56206200  | -1.80100800 | 1.07468400  |
| H | 1.42560500  | 0.27733000  | 1.33196700  | H | 8.42179400  | -0.42230000 | 2.96514400  |
| H | 3.28326000  | -1.62357500 | -2.85132100 | H | 7.47310700  | 1.83591800  | 3.38640800  |
| H | 0.87606700  | -1.36669700 | -2.65180600 | C | -0.30910000 | -0.54830800 | -0.33353400 |
| C | -0.53488500 | -0.39316400 | -0.47916200 | C | -3.11660200 | -0.17748800 | 0.08629800  |
| C | -3.33979100 | -0.07157200 | -0.21283400 | C | -0.93312800 | 0.72638000  | -0.49403500 |
| C | -1.42364600 | -0.54979200 | -1.58913300 | C | -1.17990600 | -1.64425800 | -0.05290900 |
| C | -1.14299200 | -0.06680900 | 0.77261200  | C | -2.52696400 | -1.47297400 | 0.14743500  |
| C | -2.50360300 | 0.09071300  | 0.91003600  | C | -2.27587900 | 0.91222600  | -0.30066500 |
| C | -2.78653400 | -0.39402900 | -1.46565800 | H | -0.34329800 | 1.57327800  | -0.82528500 |
| H | -1.03019400 | -0.77876800 | -2.57240800 | H | -0.77742100 | -2.64677300 | 0.02477500  |
| H | -0.53348500 | 0.03748600  | 1.66276500  | H | -3.14176400 | -2.34363800 | 0.33100400  |
| H | -2.93687600 | 0.32592800  | 1.87818700  | H | -2.70169700 | 1.88812700  | -0.49053900 |
| H | -3.43555900 | -0.51170100 | -2.32924800 | N | -4.46455200 | 0.00803100  | 0.30314300  |
| N | -4.75622100 | 0.07741200  | -0.07389300 | C | -5.34728200 | -1.06116300 | 0.62534400  |
| C | -5.35120900 | 1.30514800  | -0.29511300 | C | -7.10658600 | -3.14925400 | 1.17477900  |
| C | -6.63991500 | 3.74820400  | -0.72506500 | C | -6.52187400 | -1.20435400 | -0.12908700 |
| C | -4.60070400 | 2.44154100  | -0.65756200 | C | -5.09351700 | -1.92167200 | 1.69990600  |
| C | -6.75310000 | 1.42873500  | -0.15458700 | C | -5.96750300 | -2.96789200 | 1.96400700  |
| C | -7.39578100 | 2.64265400  | -0.36836400 | C | -7.39414400 | -2.25853400 | 0.14503700  |
| C | -5.24433800 | 3.64425800  | -0.86798300 | H | -4.21756500 | -1.75771500 | 2.31923500  |
| H | -3.52714100 | 2.34813100  | -0.76303600 | H | -5.76659200 | -3.63576100 | 2.79445200  |
| H | -8.47186700 | 2.69123000  | -0.24884300 | H | -8.30103900 | -2.36418400 | -0.44158200 |
| H | -4.66463700 | 4.51655700  | -1.14574000 | H | -7.78851900 | -3.96661700 | 1.38251300  |
| H | -7.13117100 | 4.69963700  | -0.89348700 | C | -5.09536400 | 1.27883800  | 0.19139300  |
| C | -5.53569800 | -1.00563800 | 0.28628500  | C | -6.36874600 | 3.73865800  | -0.10073300 |
| C | -7.19024200 | -3.13911900 | 1.01132300  | C | -4.62791500 | 2.39389500  | 0.89743500  |
| C | -4.97812500 | -2.27765400 | 0.52642900  | C | -6.24587500 | 1.38204900  | -0.60593000 |
| C | -6.93387000 | -0.83681600 | 0.41819700  | C | -6.87355200 | 2.61909800  | -0.75529000 |
| C | -7.75817500 | -1.89653200 | 0.77840400  | C | -5.25851100 | 3.62082900  | 0.73997800  |
| C | -5.80168300 | -3.32578300 | 0.88439600  | H | -3.77813500 | 2.28583700  | 1.56370600  |
| H | -3.90809500 | -2.40885900 | 0.42542300  | H | -7.76260900 | 2.69329600  | -1.37317900 |
| H | -8.82404300 | -1.72152300 | 0.86688000  | H | -4.89086300 | 4.48424300  | 1.28341800  |
| H | -5.37000000 | -4.30232300 | 1.06918200  | H | -6.86069500 | 4.69759600  | -0.22160800 |
| H | -7.82408400 | -3.97202000 | 1.29315100  | S | -6.87913400 | -0.05030700 | -1.40852800 |
| O | -7.51713200 | 0.36580200  | 0.19537900  |   |             |             |             |

**PTZ-Ph-TTR**

|   |            |             |             |
|---|------------|-------------|-------------|
| H | 3.49167200 | -3.15898300 | -1.00014500 |
| C | 3.05702700 | -2.17655900 | -0.84643900 |
| C | 1.99361600 | 0.37662800  | -0.38736400 |
| C | 3.91520900 | -1.06356400 | -0.80071300 |
| C | 1.69592600 | -2.02323500 | -0.70814200 |
| C | 1.11492500 | -0.72540000 | -0.48878200 |
| C | 3.35467700 | 0.22541600  | -0.55631800 |
| H | 1.06494800 | -2.89897700 | -0.79875100 |
| H | 1.62557200 | 1.36451100  | -0.13039100 |
| S | 5.63206200 | -1.29095600 | -0.93723600 |
| O | 5.94325400 | -2.67043300 | -0.63744900 |
| O | 6.13977600 | -0.73524800 | -2.16570400 |
| S | 4.37645700 | 1.64447500  | -0.37193800 |
| O | 4.92456100 | 2.02872000  | -1.64547700 |
| O | 3.65556000 | 2.63935000  | 0.38837800  |
| C | 5.66766500 | 0.99054500  | 0.64678000  |
| C | 7.64863800 | -0.02751200 | 2.31450000  |
| C | 6.20500000 | -0.28666000 | 0.40438300  |
| C | 6.10985900 | 1.74484400  | 1.72955800  |
| C | 7.11597600 | 1.24249300  | 2.55162900  |
| C | 7.18250900 | -0.80068900 | 1.25494900  |

**Cartesian Coordinates for The T<sub>1</sub> Geometries****m-Cz-DPS-Cz**

|   |             |            |             |
|---|-------------|------------|-------------|
| S | 0.14931300  | 3.79213100 | 1.01002300  |
| O | -0.03486400 | 3.26764900 | 2.34212400  |
| O | 0.27531300  | 5.21500500 | 0.80794600  |
| C | -1.09622200 | 3.14110500 | -0.05621100 |
| C | -2.51412000 | 1.81410900 | -2.02642500 |
| C | -1.61812300 | 1.89576100 | 0.26443800  |
| C | -1.25511800 | 3.75695200 | -1.29393000 |
| C | -2.00656000 | 3.07091900 | -2.29636300 |
| C | -2.34829900 | 1.21574000 | -0.76239000 |
| H | -1.45619000 | 1.45449200 | 1.24232800  |
| H | -0.81457500 | 4.73034000 | -1.47456300 |
| H | -2.16897600 | 3.52816000 | -3.26533800 |
| H | -3.08152100 | 1.27879600 | -2.78387000 |
| C | 1.52915200  | 2.97787500 | 0.25564600  |
| C | 3.31586100  | 1.52477100 | -1.27915200 |
| C | 2.16760700  | 3.60513500 | -0.80478200 |
| C | 1.74562500  | 1.64930700 | 0.60041100  |
| C | 2.65501000  | 0.90937900 | -0.20426800 |

|                      |             |             |             |                        |             |             |             |
|----------------------|-------------|-------------|-------------|------------------------|-------------|-------------|-------------|
| C                    | 3.10052300  | 2.86314000  | -1.57055200 | H                      | -0.55109600 | -0.42402200 | 3.83651700  |
| H                    | 1.94328900  | 4.64248800  | -1.02722200 | H                      | -2.32784300 | 0.85629300  | 2.62572400  |
| H                    | 1.27563100  | 1.21767400  | 1.47665900  | C                      | 1.04168900  | -2.58315100 | -0.86663000 |
| H                    | 3.60681300  | 3.32446200  | -2.41020100 | C                      | 1.96441900  | -0.21670800 | -2.15052900 |
| H                    | 3.97389500  | 0.92845200  | -1.90449900 | C                      | 2.03122100  | -1.76196100 | -0.24255500 |
| N                    | -2.86589600 | -0.07195300 | -0.51715600 | C                      | 0.52106500  | -2.17989600 | -2.13823200 |
| N                    | 2.87854400  | -0.44950800 | 0.08037000  | C                      | 0.99309100  | -1.04844800 | -2.76507400 |
| C                    | -3.72001400 | -0.42063100 | 0.52952600  | C                      | 2.43720900  | -0.62171000 | -0.89016000 |
| C                    | -5.41829600 | -1.56489300 | 2.37981000  | H                      | 2.42355200  | -2.01316800 | 0.73882600  |
| C                    | -4.05955700 | -1.78784000 | 0.41634000  | H                      | -0.24697700 | -2.79047500 | -2.60201100 |
| C                    | -4.23824100 | 0.39534100  | 1.53759100  | H                      | 0.60138500  | -0.77738800 | -3.74131800 |
| C                    | -5.08574200 | -0.20397400 | 2.46444300  | H                      | 2.33613500  | 0.68890900  | -2.61613600 |
| C                    | -4.91508000 | -2.36372100 | 1.35311300  | N                      | -3.33209800 | 0.31270100  | 0.27530300  |
| H                    | -3.99287300 | 1.45054900  | 1.59079400  | C                      | -2.88811300 | 1.18076500  | -0.74973400 |
| H                    | -5.50153100 | 0.39738000  | 3.26607100  | C                      | -2.04290400 | 2.97069600  | -2.75824000 |
| H                    | -5.19191900 | -3.41124200 | 1.28177700  | C                      | -1.63224200 | 1.04049700  | -1.35515200 |
| H                    | -6.08410400 | -1.99773300 | 3.11886700  | C                      | -3.71599400 | 2.23481100  | -1.17364900 |
| C                    | -2.64113700 | -1.19609600 | -1.29541300 | C                      | -3.30636600 | 3.10152700  | -2.18416300 |
| C                    | -2.36662200 | -3.70404100 | -2.42155200 | C                      | -1.21073900 | 1.93870400  | -2.33439700 |
| C                    | -1.76256900 | -1.34423700 | -2.37561200 | H                      | -0.98009100 | 0.21919900  | -1.07902500 |
| C                    | -3.36701400 | -2.28969300 | -0.76059500 | H                      | -3.97903300 | 3.89299900  | -2.50130300 |
| C                    | -3.22824700 | -3.54965000 | -1.33102500 | H                      | -0.22564100 | 1.80546400  | -2.77197000 |
| C                    | -1.64356900 | -2.61518000 | -2.92981200 | H                      | -1.72153500 | 3.66254900  | -3.52937300 |
| H                    | -1.18685600 | -0.50465100 | -2.75063500 | C                      | -4.69174100 | -0.06652900 | 0.35267400  |
| H                    | -3.76349300 | -4.40362200 | -0.92678600 | C                      | -7.41525300 | -0.76765200 | 0.47781900  |
| H                    | -0.96861600 | -2.76693500 | -3.76559200 | C                      | -5.69080100 | 0.86053700  | 0.01185500  |
| H                    | -2.24762900 | -4.68196200 | -2.87586900 | C                      | -5.08179400 | -1.34205700 | 0.77738500  |
| C                    | 1.89468700  | -1.38404500 | 0.36735900  | C                      | -6.43219700 | -1.68013000 | 0.85019500  |
| C                    | 0.32946200  | -3.56534600 | 1.01672300  | C                      | -7.03607500 | 0.50264600  | 0.04766700  |
| C                    | 2.50724400  | -2.62911600 | 0.65590200  | H                      | -4.33080100 | -2.07064200 | 1.05930600  |
| C                    | 0.50039900  | -1.22886500 | 0.34309900  | H                      | -6.70827100 | -2.67274900 | 1.19085100  |
| C                    | -0.26288500 | -2.33819600 | 0.70830700  | H                      | -7.78348000 | 1.23566100  | -0.24132900 |
| C                    | 1.72306600  | -3.72622500 | 0.97231400  | H                      | -8.46527300 | -1.03574500 | 0.52217600  |
| H                    | 0.03401800  | -0.28828200 | 0.06386800  | S                      | -5.24064600 | 2.52948600  | -0.33881300 |
| H                    | -1.34226400 | -2.24719400 | 0.74860900  | N                      | 3.36623000  | 0.25957200  | -0.20332200 |
| H                    | 2.17406000  | -4.68990800 | 1.18751000  | C                      | 2.80945200  | 1.25465900  | 0.58597500  |
| H                    | -0.29925300 | -4.40657300 | 1.28859200  | C                      | 1.62977300  | 3.27805000  | 2.15890700  |
| C                    | 4.12932700  | -1.06962500 | 0.17722200  | C                      | 3.60436600  | 2.18920300  | 1.29255000  |
| C                    | 6.32297800  | -2.70611000 | 0.53889700  | C                      | 1.40027800  | 1.35555500  | 0.70136500  |
| C                    | 5.40009600  | -0.50598900 | 0.04659900  | C                      | 0.82882300  | 2.35178300  | 1.46192200  |
| C                    | 3.94297200  | -2.42636100 | 0.52246600  | C                      | 3.00216200  | 3.19215800  | 2.07790600  |
| C                    | 5.04797900  | -3.25105800 | 0.70135300  | H                      | 0.77124000  | 0.64037300  | 0.18809700  |
| C                    | 6.49234300  | -1.35057400 | 0.22475600  | H                      | -0.25330200 | 2.41122400  | 1.51612600  |
| H                    | 5.53561900  | 0.54812200  | -0.16602300 | H                      | 3.63666500  | 3.89408300  | 2.61026600  |
| H                    | 4.92369000  | -4.29470400 | 0.97255200  | H                      | 1.17087300  | 4.05639500  | 2.75821100  |
| H                    | 7.49404500  | -0.94593300 | 0.12731400  | C                      | 4.72058200  | 0.06905400  | -0.41380200 |
| H                    | 7.19611600  | -3.33570800 | 0.67283600  | C                      | 7.46853600  | -0.37999600 | -0.85656000 |
| <b>m-PTZ-DPS-PTZ</b> |             |             |             | C                      | 5.15486700  | -0.97044600 | -1.27257200 |
| S                    | 0.08500000  | -3.57285200 | 0.15880800  | C                      | 5.70293000  | 0.87704800  | 0.20807500  |
| O                    | 0.92665400  | -4.24006900 | 1.13039300  | C                      | 7.07170600  | 0.63952200  | -0.01978600 |
| O                    | -0.83981000 | -4.33811800 | -0.64908400 | C                      | 6.49827400  | -1.18430100 | -1.48590000 |
| C                    | -0.83897800 | -2.35602800 | 1.05568900  | H                      | 4.41616800  | -1.59550000 | -1.75756200 |
| C                    | -1.89698300 | -0.04492400 | 2.20045300  | H                      | 7.80352400  | 1.27241600  | 0.47275200  |
| C                    | -1.84125900 | -1.64657500 | 0.38243100  | H                      | 6.80660000  | -1.98641600 | -2.14700000 |
| C                    | -0.36192500 | -1.91017400 | 2.29436600  | H                      | 8.52363600  | -0.55980900 | -1.02893600 |
| C                    | -0.90597400 | -0.76379900 | 2.86829100  | S                      | 5.32400900  | 2.18126600  | 1.26316300  |
| C                    | -2.35275500 | -0.48596700 | 0.95324900  | <b>m-DMAC-DPS-DMAC</b> |             |             |             |
| H                    | -2.19405000 | -1.98333300 | -0.58985400 | S                      | 0.28419800  | 4.10783700  | 0.67355300  |
| H                    | 0.42002300  | -2.47371400 | 2.79227300  | O                      | 0.46026900  | 5.51429200  | 0.37589200  |

|   |             |             |             |                      |             |             |             |
|---|-------------|-------------|-------------|----------------------|-------------|-------------|-------------|
| O | 0.10203100  | 3.67110700  | 2.04395100  | H                    | -6.02348500 | 2.29342400  | 2.05626000  |
| C | 1.74279100  | 3.28571200  | 0.08748700  | H                    | -5.92273500 | -1.99476700 | 2.08437600  |
| C | 3.90222800  | 1.88319600  | -0.98446000 | H                    | -6.90946100 | 0.10781000  | 2.87349100  |
| C | 2.68727000  | 3.95971200  | -0.69008400 | C                    | -3.87440800 | -2.38975500 | 0.35600600  |
| C | 1.85203600  | 1.90699300  | 0.29897600  | C                    | 2.24347500  | -2.78442100 | 0.73882500  |
| C | 2.91660900  | 1.20779600  | -0.25697800 | C                    | 2.28250900  | -4.28211100 | 1.04296500  |
| C | 3.77352200  | 3.25509600  | -1.20671500 | H                    | 2.00821700  | -4.46567100 | 2.08502000  |
| H | 2.57450800  | 5.02598900  | -0.85477900 | H                    | 3.27405300  | -4.70929200 | 0.86163100  |
| H | 1.12373100  | 1.37815500  | 0.90644400  | H                    | 1.55279800  | -4.81443800 | 0.42614400  |
| H | 4.53263100  | 3.78008300  | -1.77800400 | C                    | 0.80987600  | -2.27188100 | 1.03463800  |
| H | 4.75580100  | 1.33314200  | -1.36907600 | H                    | 0.71046700  | -1.20753900 | 0.79646900  |
| C | -0.98932100 | 3.46820300  | -0.26730600 | H                    | 0.57972700  | -2.41425000 | 2.09597200  |
| C | -2.60862500 | 2.00737500  | -2.09822900 | H                    | 0.08231500  | -2.82766700 | 0.43304800  |
| C | -1.51460900 | 2.19007600  | 0.09584500  | C                    | -5.00936700 | -3.21050300 | -0.30029100 |
| C | -1.26348400 | 3.97693500  | -1.57988900 | H                    | -5.81173300 | -3.39757100 | 0.41670400  |
| C | -2.06260000 | 3.27353900  | -2.44902600 | H                    | -4.63646900 | -4.17866500 | -0.64147200 |
| C | -2.29075400 | 1.51707300  | -0.81791800 | H                    | -5.42578100 | -2.67544100 | -1.15769900 |
| H | -1.33155200 | 1.77803100  | 1.08366300  | C                    | -3.30634100 | -3.16427800 | 1.57266000  |
| H | -0.84767800 | 4.93893800  | -1.86285200 | H                    | -4.09139000 | -3.33893500 | 2.31287900  |
| H | -2.28595700 | 3.69176500  | -3.42583200 | H                    | -2.49876500 | -2.59885500 | 2.04595500  |
| H | -3.23445000 | 1.43560600  | -2.77281000 | H                    | -2.91252400 | -4.13300800 | 1.25414200  |
| N | 2.98481100  | -0.20118200 | -0.01763800 |                      |             |             |             |
| N | -2.82504700 | 0.22681300  | -0.43219400 |                      |             |             |             |
| C | 2.82002400  | -1.12807100 | -1.05962400 | <b>m-PXZ-DPS-PXZ</b> |             |             |             |
| C | 2.71811600  | -3.07596600 | -3.07485600 | S                    | 0.00000200  | -3.55943800 | -0.00001100 |
| C | 2.56992800  | -2.47547900 | -0.71829500 | O                    | 0.84597500  | -4.27903100 | -0.92806600 |
| C | 2.91782800  | -0.76006100 | -2.40997700 | O                    | -0.84598800 | -4.27903300 | 0.92802800  |
| C | 2.87281500  | -1.73221300 | -3.40608700 | C                    | -0.96877900 | -2.44066300 | -0.91214600 |
| C | 2.55373700  | -3.43000200 | -1.73505100 | C                    | -1.94178000 | -0.02791400 | -2.00341400 |
| H | 3.05166400  | 0.27918800  | -2.68348600 | C                    | -1.95914800 | -1.70049700 | -0.22186200 |
| H | 2.97154800  | -1.42989700 | -4.44426600 | C                    | -0.47956700 | -1.95899900 | -2.15207300 |
| H | 2.39616300  | -4.47370000 | -1.48412900 | C                    | -0.97881800 | -0.78322700 | -2.68982700 |
| H | 2.70659000  | -3.83854500 | -3.84677100 | C                    | -2.40500200 | -0.51438500 | -0.76984200 |
| C | 3.46570700  | -0.65560700 | 1.22624500  | H                    | -2.33589200 | -2.04054000 | 0.73861800  |
| C | 4.52669200  | -1.63344800 | 3.61893000  | H                    | 0.28225800  | -2.52998100 | -2.67236100 |
| C | 4.20815600  | 0.18663700  | 2.06379400  | H                    | -0.60743100 | -0.43394600 | -3.64909200 |
| C | 3.21018600  | -1.98641000 | 1.60431700  | C                    | 0.96879800  | -2.44067900 | 0.91213000  |
| C | 3.76978700  | -2.46128200 | 2.79070900  | C                    | 1.94182000  | -0.02795000 | 2.00342900  |
| C | 4.72736000  | -0.30336800 | 3.25770400  | C                    | 0.47960300  | -1.95903400 | 2.15207200  |
| H | 4.38486500  | 1.21708800  | 1.77574300  | C                    | 1.95915600  | -1.70049900 | 0.22184400  |
| H | 3.59987700  | -3.49012500 | 3.08967700  | C                    | 2.40501800  | -0.51439700 | 0.76984000  |
| H | 5.30149900  | 0.35859700  | 3.89819600  | C                    | 0.97886000  | -0.78327000 | 2.68983800  |
| H | 4.94224200  | -2.02232400 | 4.54260800  | H                    | -0.28221000 | -2.53002800 | 2.67236400  |
| C | -2.23441200 | -0.91131200 | -0.95535300 | H                    | 2.33588500  | -2.04052700 | -0.73864700 |
| C | -1.06026900 | -3.15840900 | -2.09961800 | H                    | 0.60748900  | -0.43400600 | 3.64911600  |
| C | -1.10129600 | -0.77176900 | -1.79802300 | H                    | 2.33545900  | 0.90161000  | 2.40142300  |
| C | -2.74941200 | -2.19158400 | -0.64049800 | N                    | -3.34978700 | 0.28369200  | -0.03518400 |
| C | -2.14505000 | -3.29763000 | -1.23984600 | N                    | 3.34978900  | 0.28369900  | 0.03518100  |
| C | -0.52943600 | -1.88985000 | -2.36577200 | C                    | -2.89129900 | 1.17506300  | 0.92630600  |
| H | -0.68584400 | 0.21168700  | -1.98192500 | C                    | -2.06403400 | 3.02535300  | 2.86666600  |
| H | -2.51640100 | -4.29272500 | -1.01816800 | C                    | -1.53749900 | 1.26436900  | 1.28971100  |
| H | 0.34472500  | -1.78457200 | -2.99772000 | C                    | -3.81646100 | 2.03052400  | 1.56043200  |
| H | -0.60470100 | -4.03810600 | -2.54361200 | C                    | -3.40975000 | 2.94521400  | 2.52105500  |
| C | -3.91868100 | 0.17776900  | 0.42264800  | C                    | -1.13410900 | 2.18399000  | 2.24807700  |
| C | -6.07566900 | 0.13501200  | 2.18007200  | H                    | -0.81609900 | 0.59478300  | 0.83434500  |
| C | -4.43801500 | -1.06847100 | 0.84137700  | H                    | -4.15973900 | 3.58054500  | 2.97908500  |
| C | -4.50974500 | 1.39048200  | 0.85317200  | H                    | -0.08345100 | 2.23694900  | 2.51348000  |
| C | -5.57680700 | 1.36246000  | 1.72629100  | H                    | -1.74349200 | 3.74024400  | 3.61627200  |
| C | -5.51220700 | -1.05434700 | 1.73200000  | C                    | -4.70242100 | 0.23976100  | -0.35334500 |
| H | -4.11926500 | 2.33356200  | 0.49282700  | C                    | -7.44634900 | 0.21723700  | -0.92159000 |
|   |             |             |             | C                    | -5.21902300 | -0.64919800 | -1.30732600 |



|                      |             |             |             |                    |             |             |             |
|----------------------|-------------|-------------|-------------|--------------------|-------------|-------------|-------------|
| C                    | -5.58878900 | 1.11040600  | 0.30913900  | C                  | -3.66098900 | -1.18057000 | 2.18013900  |
| C                    | -6.94791700 | 1.10148000  | 0.02963300  | C                  | -3.35984300 | -1.85352700 | 3.35717800  |
| C                    | -6.57899900 | -0.65559100 | -1.58591800 | C                  | -1.00813200 | -1.73464800 | 2.83497800  |
| H                    | -4.54396800 | -1.32801700 | -1.81581500 | H                  | -0.50279300 | -0.77689900 | 0.97176200  |
| H                    | -7.59061600 | 1.79072900  | 0.56620600  | H                  | 4.69034900  | -0.94688400 | 1.92760900  |
| H                    | -6.96528800 | -1.34943300 | -2.32420700 | H                  | -4.16408400 | -2.14889300 | 4.02301900  |
| H                    | -8.50791800 | 0.20707300  | -1.14186100 | H                  | 0.02692600  | -1.95284400 | 3.07851100  |
| C                    | 4.70242700  | 0.23976100  | 0.35332000  | H                  | -1.80123700 | -2.65303000 | 4.61567200  |
| C                    | 7.44636300  | 0.21723000  | 0.92152200  | C                  | -4.10828800 | -0.51959400 | -0.59064400 |
| C                    | 5.58878300  | 1.11042200  | -0.30915800 | C                  | -6.37511900 | -1.37684900 | -1.97264700 |
| C                    | 5.21904500  | -0.64921900 | 1.30727200  | C                  | -5.05900500 | 0.41436200  | -1.01899800 |
| C                    | 6.57902400  | -0.65561600 | 1.58584300  | C                  | -4.30064300 | -1.88286600 | -0.84146000 |
| C                    | 6.94791500  | 1.10149300  | -0.02967300 | C                  | -5.43177400 | -2.30620500 | -1.53189900 |
| H                    | 4.54399900  | -1.32805100 | 1.81575600  | C                  | -6.18534300 | -0.01903900 | -1.71132500 |
| H                    | 6.96532600  | -1.34947400 | 2.32411100  | H                  | -4.91102100 | 1.46683300  | -0.79897800 |
| H                    | 7.59060400  | 1.79075500  | -0.56624000 | H                  | -3.56374800 | -2.59648600 | -0.48610300 |
| H                    | 8.50793500  | 0.20706400  | 1.14177700  | H                  | -5.57468500 | -3.36369800 | -1.72887800 |
| C                    | 2.89128400  | 1.17508900  | -0.92628200 | H                  | -6.92318700 | 0.70682500  | -2.03712400 |
| C                    | 2.06398800  | 3.02543300  | -2.86657800 | H                  | -7.25685500 | -1.70935700 | -2.51028700 |
| C                    | 1.53747500  | 1.26441400  | -1.28965500 | C                  | 1.71318000  | -1.53790600 | -0.48427500 |
| C                    | 3.81643500  | 2.03056400  | -1.56040400 | C                  | -0.58887500 | -3.07236200 | -0.88152700 |
| C                    | 3.40971000  | 2.94528100  | -2.52099600 | C                  | 1.55735600  | -2.76202900 | 0.18625100  |
| C                    | 1.13407100  | 2.18406100  | -2.24798900 | C                  | 0.69386500  | -1.07097300 | -1.33447500 |
| H                    | 0.81607900  | 0.59482600  | -0.83428700 | C                  | -0.44506100 | -1.84263200 | -1.53142800 |
| H                    | 4.15969200  | 3.58062200  | -2.97902200 | C                  | 0.41162200  | -3.52154200 | -0.01797200 |
| H                    | 0.08340800  | 2.23703300  | -2.51336700 | H                  | 2.33569900  | -3.10352500 | 0.86135400  |
| H                    | 1.74343300  | 3.74034500  | -3.61615800 | H                  | 0.81100800  | -0.11652700 | -1.84008000 |
| O                    | -5.14659000 | 1.99670200  | 1.25120300  | H                  | -1.22154900 | -1.48326000 | -2.20108300 |
| O                    | 5.14656800  | 1.99673800  | -1.25119400 | H                  | 0.29313600  | -4.46197800 | 0.51034600  |
| H                    | -2.33541200 | 0.90165500  | -2.40139500 | H                  | -1.47311900 | -3.67870000 | -1.04832900 |
| <b>m-DPA-DPS-DPA</b> |             |             |             | C                  | 4.15666200  | -1.43154100 | -0.29928900 |
| S                    | 0.53428400  | 3.50951000  | 1.10355600  | C                  | 6.67671300  | -2.63613500 | -0.22976800 |
| O                    | 0.68592900  | 4.93122800  | 0.87781300  | C                  | 4.39301400  | -2.60814500 | -1.02725400 |
| O                    | 0.32960500  | 3.00346100  | 2.44470000  | C                  | 5.19024000  | -0.85726600 | 0.45663900  |
| C                    | -0.76618900 | 2.89925900  | 0.11538800  | C                  | 6.44222000  | -1.46101700 | 0.48511400  |
| C                    | -2.25164200 | 1.36450200  | -1.70399400 | C                  | 5.64761900  | -3.20380500 | -0.98454600 |
| C                    | -1.46256500 | 1.77088200  | 0.56904600  | H                  | 3.60077900  | -3.03512500 | -1.63339300 |
| C                    | -0.83154800 | 3.28235700  | -1.24730900 | H                  | 4.99530300  | 0.04832700  | 1.02220900  |
| C                    | -1.56860700 | 2.50576900  | -2.13186700 | H                  | 7.23503400  | -1.01506200 | 1.07656300  |
| C                    | -2.21728500 | 1.00746000  | -0.33057300 | H                  | 5.82693000  | -4.10874600 | -1.55588500 |
| H                    | -1.43489900 | 1.52619800  | 1.62442200  | H                  | 7.65459800  | -3.10507200 | -0.20254500 |
| H                    | -0.30155400 | 4.16764700  | -1.58367600 | <b>p-Cz-DPA-Cz</b> |             |             |             |
| H                    | -1.61225600 | 2.78404500  | -3.18031200 | S                  | -0.01776500 | -4.24383800 | 0.74874500  |
| H                    | -2.80315000 | 0.75756800  | -2.41181400 | O                  | -0.01335000 | -4.72881500 | 2.10851600  |
| C                    | 1.87570300  | 2.70480900  | 0.37055400  | O                  | -0.03055700 | -5.16111700 | -0.36634700 |
| C                    | 3.67021300  | 1.29974600  | -1.30273500 | C                  | -1.29084500 | -3.09748600 | 0.55501000  |
| C                    | 2.61801400  | 3.38284200  | -0.64197100 | C                  | -2.83405900 | -0.79559400 | 0.14567100  |
| C                    | 1.97774100  | 1.29854800  | 0.47509600  | C                  | -1.71354600 | -2.74167700 | -0.76318400 |
| C                    | 2.84788200  | 0.61782200  | -0.36454300 | C                  | -1.66797000 | -2.27911700 | 1.66545500  |
| C                    | 3.51277800  | 2.68263200  | -1.43664300 | C                  | -2.41952000 | -1.15056700 | 1.45667800  |
| H                    | 2.50039700  | 4.45610100  | -0.74295900 | C                  | -2.47465200 | -1.61747700 | -0.95638600 |
| H                    | 1.38747900  | 0.75530700  | 1.20850700  | H                  | -1.42284400 | -3.37003800 | -1.59798000 |
| H                    | 4.09650800  | 3.21702600  | -2.17989000 | H                  | -1.38455400 | -2.58431700 | 2.66697500  |
| H                    | 4.34134400  | 0.73596100  | -1.94027400 | H                  | -2.75307500 | -0.54984400 | 2.29730000  |
| N                    | -2.95169200 | -0.09665100 | 0.11878500  | H                  | -2.77837000 | -1.32599900 | -1.95692400 |
| N                    | 2.89904400  | -0.79492300 | -0.33493700 | C                  | 1.26989100  | -3.11545300 | 0.54430800  |
| C                    | -2.62892100 | -0.77831900 | 1.31779800  | C                  | 2.83563700  | -0.82701900 | 0.14293200  |
| C                    | -2.03259900 | -2.13185100 | 3.69269200  | C                  | 1.66704800  | -2.74011900 | -0.77645500 |
| C                    | -1.29821300 | -1.06790300 | 1.64921900  | C                  | 1.68721900  | -2.32614000 | 1.66088000  |

|                      |             |             |             |                        |             |             |             |
|----------------------|-------------|-------------|-------------|------------------------|-------------|-------------|-------------|
| C                    | 2.45213300  | -1.20584700 | 1.45641100  | H                      | 2.35030200  | -0.95028700 | -1.93423500 |
| C                    | 2.43655700  | -1.62107700 | -0.96628700 | H                      | 2.87782500  | -1.46853200 | 2.32742300  |
| H                    | 1.34691500  | -3.34673600 | -1.61661400 | C                      | -1.20314700 | -3.49320600 | 0.08780000  |
| H                    | 1.42501800  | -2.64869800 | 2.66265900  | C                      | -2.50431100 | -1.03636800 | -0.07549200 |
| H                    | 2.71610800  | -1.31204600 | -1.96850300 | C                      | -1.40363200 | -2.73155900 | 1.24965800  |
| N                    | -3.59728500 | 0.35616300  | -0.05970400 | C                      | -1.72005400 | -3.05602900 | -1.14088200 |
| C                    | -4.74811200 | 0.44848000  | -0.85106400 | C                      | -2.38761500 | -1.83919100 | -1.21337500 |
| C                    | -7.05407000 | 1.12064000  | -2.22203500 | C                      | -2.04906900 | -1.50396400 | 1.16121700  |
| C                    | -5.42929900 | -0.56162300 | -1.53401100 | H                      | -1.01494700 | -3.08690300 | 2.19897800  |
| C                    | -5.22778600 | 1.77557700  | -0.81293000 | H                      | -1.56895200 | -3.66399700 | -2.02682500 |
| C                    | -6.38729000 | 2.11354800  | -1.50757500 | H                      | -2.78059500 | -1.48043700 | -2.16158700 |
| C                    | -6.58206000 | -0.20038600 | -2.22496700 | H                      | -2.19119400 | -0.88573300 | 2.04375200  |
| H                    | -5.08932500 | -1.59083500 | -1.51589500 | N                      | 3.09646700  | 0.29895400  | 0.31411600  |
| H                    | -6.76880700 | 3.12973200  | -1.48442900 | C                      | 4.40579500  | 0.59290200  | -0.04332700 |
| H                    | -7.13084300 | -0.96219200 | -2.76874900 | C                      | 7.07589200  | 1.11358400  | -0.79480000 |
| H                    | -7.95721700 | 1.36647500  | -2.77035000 | C                      | 4.91917900  | 1.91253600  | -0.05576300 |
| C                    | -3.33725000 | 1.61624000  | 0.48763500  | C                      | 5.27650800  | -0.46152800 | -0.41162900 |
| C                    | -3.21722300 | 4.26916500  | 1.26163600  | C                      | 6.57946500  | -0.20230200 | -0.77675800 |
| C                    | -4.32592400 | 2.52340000  | 0.04734500  | C                      | 6.25072400  | 2.15787200  | -0.43445900 |
| C                    | -2.26204300 | 2.02623500  | 1.27957900  | H                      | 4.90043600  | -1.47635700 | -0.39590100 |
| C                    | -2.22615900 | 3.36297400  | 1.66577800  | H                      | 7.22572700  | -1.02886500 | -1.05050200 |
| C                    | -4.26614100 | 3.85793000  | 0.44127700  | H                      | 6.61684400  | 3.18008700  | -0.43359500 |
| H                    | -1.47696800 | 1.33772700  | 1.57117900  | H                      | 8.10216600  | 1.30902400  | -1.08457600 |
| H                    | -1.40743400 | 3.71156600  | 2.28645000  | C                      | 2.17206900  | 1.24000000  | 0.75403600  |
| H                    | -5.01798600 | 4.56670200  | 0.10789700  | C                      | 0.24651600  | 3.10571000  | 1.64028700  |
| H                    | -3.15710000 | 5.30433600  | 1.58020700  | C                      | 0.87118400  | 0.82173900  | 1.12682500  |
| H                    | 2.81885300  | -0.63076800 | 2.30102400  | C                      | 2.47124100  | 2.62483100  | 0.83502400  |
| N                    | 3.60381200  | 0.32209600  | -0.05725200 | C                      | 1.50395000  | 3.54218300  | 1.27743400  |
| C                    | 4.72452000  | 0.42755500  | -0.88947000 | C                      | -0.06207200 | 1.73703900  | 1.56339300  |
| C                    | 6.98324800  | 1.12020300  | -2.32787000 | H                      | 0.60226900  | -0.22533700 | 1.04683400  |
| C                    | 5.21640000  | 1.74952300  | -0.83397800 | H                      | 1.75979500  | 4.59655200  | 1.32089500  |
| C                    | 5.37195700  | -0.56848100 | -1.62404800 | H                      | -1.05935400 | 1.39413800  | 1.82421900  |
| C                    | 6.50096100  | -0.19694200 | -2.34789500 | H                      | -0.50340900 | 3.81675800  | 1.97023800  |
| C                    | 6.35177600  | 2.09796600  | -1.56247600 | S                      | 3.99022600  | 3.29451800  | 0.37940900  |
| H                    | 5.02578200  | -1.59571400 | -1.61998900 | N                      | -3.03352800 | 0.29494200  | -0.15407200 |
| H                    | 7.02317400  | -0.94787800 | -2.93147200 | C                      | -2.23166600 | 1.28622800  | -0.77051800 |
| H                    | 6.74227700  | 3.11032900  | -1.52615400 | C                      | -0.61686700 | 3.32104900  | -1.87847100 |
| H                    | 7.86725300  | 1.37427200  | -2.90296400 | C                      | -1.07171200 | 0.97247300  | -1.49203000 |
| C                    | 3.37730900  | 1.56835800  | 0.53575300  | C                      | -2.55882600 | 2.64417900  | -0.60496900 |
| C                    | 3.31619700  | 4.19856600  | 1.39201900  | C                      | -1.77682800 | 3.64519400  | -1.17715700 |
| C                    | 2.34144400  | 1.96395000  | 1.38555500  | C                      | -0.26883000 | 1.98125800  | -2.02262600 |
| C                    | 4.35548400  | 2.47991000  | 0.08137800  | H                      | -0.76087600 | -0.05983400 | -1.60514300 |
| C                    | 4.32489600  | 3.80290800  | 0.51558600  | H                      | -2.07088900 | 4.68220000  | -1.04207800 |
| C                    | 2.33555200  | 3.28864500  | 1.81267600  | H                      | 0.63438000  | 1.70364500  | -2.55850700 |
| H                    | 1.56447300  | 1.27359300  | 1.69383000  | H                      | 0.00145300  | 4.10552500  | -2.30208100 |
| H                    | 5.06888500  | 4.51474000  | 0.17122900  | C                      | -4.43465900 | 0.46736300  | -0.06773800 |
| H                    | 1.54982000  | 3.62388500  | 2.48157200  | C                      | -7.21616200 | 0.85867000  | 0.11390700  |
| H                    | 3.28009600  | 5.22414200  | 1.74352200  | C                      | -4.96943800 | 1.74664200  | 0.15429000  |
| <b>p-PTZ-DPS-PTZ</b> |             |             |             | C                      | -5.31615300 | -0.61435700 | -0.17737500 |
| S                    | 0.10910700  | -4.67735100 | 0.07591700  | C                      | -6.69207800 | -0.41746500 | -0.07400100 |
| O                    | 0.01805700  | -5.40286100 | -1.17350100 | C                      | -6.34656600 | 1.94288400  | 0.21709600  |
| O                    | 0.09912600  | -5.39691100 | 1.33193300  | H                      | -4.92378700 | -1.61297700 | -0.33117700 |
| C                    | 1.45394600  | -3.59963300 | 0.04987500  | H                      | -7.35394200 | -1.27395600 | -0.15100300 |
| C                    | 2.65241100  | -1.07113400 | 0.20996000  | H                      | -6.72952700 | 2.94748300  | 0.37026900  |
| C                    | 1.92109800  | -3.09218300 | 1.30286800  | H                      | -8.28749100 | 1.01260100  | 0.18338700  |
| C                    | 1.64430100  | -2.80858800 | -1.12877400 | S                      | -3.87652000 | 3.09346500  | 0.47470200  |
| C                    | 2.22133200  | -1.56202800 | -1.04387700 | <b>p-DMAC-DPS-DMAC</b> |             |             |             |
| C                    | 2.52027000  | -1.85481500 | 1.37582900  | S                      | 0.00006400  | 4.98132400  | 0.00021000  |
| H                    | 1.79072200  | -3.69382700 | 2.19634600  | O                      | -0.07661500 | 5.70354700  | 1.25210400  |
| H                    | 1.30281200  | -3.19010000 | -2.08621200 |                        |             |             |             |

|   |             |             |             |                      |             |             |             |
|---|-------------|-------------|-------------|----------------------|-------------|-------------|-------------|
| O | 0.07671700  | 5.70366100  | -1.25162000 | H                    | 1.87483000  | -4.41055200 | 1.20112300  |
| C | -1.30540100 | 3.83513900  | -0.09949600 | C                    | -0.07832600 | -1.70438500 | 1.74089800  |
| C | -2.46125800 | 1.30295100  | -0.33183700 | H                    | -1.07404300 | -1.42513200 | 2.07358200  |
| C | -1.63377200 | 3.31305300  | -1.37578300 | C                    | 0.30716000  | -3.03967300 | 1.69265600  |
| C | -1.62996900 | 3.09049000  | 1.06451800  | H                    | -0.37800400 | -3.82612100 | 1.99244300  |
| C | -2.19291800 | 1.83486700  | 0.94328500  | C                    | 5.13077400  | 0.75966100  | -0.26415100 |
| C | -2.21836500 | 2.06431200  | -1.48412000 | H                    | 4.77017700  | 1.77635900  | -0.16967300 |
| H | -1.40920400 | 3.89845700  | -2.26112100 | C                    | 6.05545800  | -1.84296000 | -0.45773000 |
| H | -1.39892700 | 3.50008100  | 2.04269900  | H                    | 6.43214300  | -2.85800400 | -0.53849500 |
| H | -2.42941800 | 1.24683400  | 1.82706000  | C                    | 6.43234400  | 0.52180800  | -0.67224800 |
| H | -2.47483000 | 1.65526900  | -2.45803100 | H                    | 7.08046500  | 1.36084300  | -0.90201600 |
| C | 1.30557500  | 3.83518500  | 0.09980700  | C                    | 6.90179400  | -0.78783900 | -0.78071800 |
| C | 2.46147000  | 1.30300200  | 0.33193100  | H                    | 7.91763500  | -0.98558500 | -1.10561700 |
| C | 1.63013900  | 3.09063700  | -1.06427100 | C                    | 3.64383300  | -3.67100000 | -0.97932300 |
| C | 1.63398200  | 3.31300900  | 1.37604900  | C                    | 4.57799400  | -3.70624500 | 1.36378000  |
| C | 2.21859100  | 2.06426800  | 1.48428000  | H                    | 3.13801800  | -3.07275300 | -1.74354800 |
| C | 2.19309700  | 1.83500900  | -0.94314500 | H                    | 4.60036600  | -4.01096200 | -1.38664900 |
| H | 1.39906400  | 3.50029600  | -2.04241600 | H                    | 3.03032800  | -4.55158000 | -0.76633900 |
| H | 1.40940600  | 3.89833600  | 2.26143700  | H                    | 5.53912800  | -4.06771600 | 0.99019800  |
| H | 2.42957100  | 1.24704000  | -1.82696900 | H                    | 3.97392900  | -4.58066700 | 1.61857500  |
| N | -2.95330900 | -0.03967300 | -0.43956900 | H                    | 4.75470500  | -3.12980100 | 2.27584100  |
| C | -2.10112200 | -1.04401300 | -0.87630500 |                      |             |             |             |
| C | -4.27007200 | -0.31430000 | -0.04157500 |                      |             |             |             |
| C | -2.50800600 | -2.39955100 | -0.84200000 | <b>p-PXZ-DPS-PXZ</b> |             |             |             |
| C | -4.73924100 | -1.63941300 | 0.03566300  | S                    | -0.05275000 | -4.18096000 | 0.05096100  |
| C | -3.86494800 | -2.83803300 | -0.30471000 | O                    | 0.04964500  | -4.87303500 | -1.21673500 |
| C | -3.64442700 | -3.67104500 | 0.97901900  | O                    | 0.02709300  | -4.92076600 | 1.29306900  |
| C | -4.57820800 | -3.70597200 | -1.36423700 | C                    | -1.45920500 | -3.20161100 | 0.06383500  |
| C | -0.79596000 | -0.71282400 | -1.32364400 | C                    | -3.11173100 | -0.94629400 | 0.13532900  |
| H | -0.47071000 | 0.32126100  | -1.32710100 | C                    | -1.85912500 | -2.56009900 | -1.15211500 |
| C | 0.07847900  | -1.70482100 | -1.74040400 | C                    | -1.91195500 | -2.67459100 | 1.31687400  |
| H | 1.07430500  | -1.42571300 | -2.07288300 | C                    | -2.72256000 | -1.56682700 | 1.34858200  |
| C | -0.30722200 | -3.04004900 | -1.69229800 | C                    | -2.67155000 | -1.45377900 | -1.11578400 |
| H | 0.37787900  | -3.82659200 | -1.99198200 | H                    | -1.51482700 | -2.96102300 | -2.10018900 |
| C | -1.59227900 | -3.36321700 | -1.24620300 | H                    | -1.61759800 | -3.17016600 | 2.23615900  |
| H | -1.87519100 | -4.41070100 | -1.20110200 | H                    | -3.07836800 | -1.16823300 | 2.29557000  |
| H | -3.03100100 | -4.55168700 | 0.76606500  | H                    | -2.97723600 | -0.96047100 | -2.03531300 |
| H | -4.60107400 | -4.01091700 | 1.38615400  | C                    | 1.24177100  | -2.97252800 | 0.08034000  |
| H | -3.13866500 | -3.07292800 | 1.74338100  | C                    | 2.88772400  | -0.73654600 | 0.09686700  |
| H | -5.53945200 | -4.06734200 | -0.99083900 | C                    | 1.58454400  | -2.37383500 | 1.29819600  |
| H | -4.75469400 | -3.12942900 | -2.27627900 | C                    | 1.73194100  | -2.46446200 | -1.12924500 |
| H | -3.97421900 | -4.58045400 | -1.61900500 | C                    | 2.56448600  | -1.35160800 | -1.11601700 |
| C | -5.13063900 | 0.75988900  | 0.26386100  | C                    | 2.40894100  | -1.25245400 | 1.30161100  |
| H | -4.76989300 | 1.77654200  | 0.16946900  | H                    | 1.20426600  | -2.79037000 | 2.22549300  |
| C | -6.43230000 | 0.52219300  | 0.67176300  | H                    | 1.46028900  | -2.95116400 | -2.06029000 |
| H | -7.08034300 | 1.36130500  | 0.90146800  | H                    | 2.96204500  | -0.94342200 | -2.04151900 |
| C | -6.90193800 | -0.78739500 | 0.78011800  | H                    | 2.68969500  | -0.76714200 | 2.23164100  |
| H | -7.91785100 | -0.98502000 | 1.10486300  | N                    | -3.80218300 | 0.31128900  | 0.17814400  |
| C | -6.05569500 | -1.84261400 | 0.45720700  | C                    | -3.13238100 | 1.45186500  | 0.58757900  |
| H | -6.43252700 | -2.85761200 | 0.53787400  | C                    | -1.86322300 | 3.80329800  | 1.42221400  |
| N | 2.95343600  | -0.03965700 | 0.43955900  | C                    | -3.82786800 | 2.67996600  | 0.64560100  |
| H | 2.47505200  | 1.65514000  | 2.45815600  | C                    | -1.76547000 | 1.42942800  | 0.94091700  |
| C | 4.27011200  | -0.31442800 | 0.04137300  | C                    | -1.14874300 | 2.59223000  | 1.35524500  |
| C | 2.10120000  | -1.04389500 | 0.87640200  | C                    | -3.19965700 | 3.85055800  | 1.06377900  |
| C | 4.73909300  | -1.63960100 | -0.03598800 | H                    | -1.21985000 | 0.49455600  | 0.87870600  |
| C | 2.50788700  | -2.39948500 | 0.84197900  | H                    | -0.09649300 | 2.57139700  | 1.61683400  |
| C | 3.86468100  | -2.83812400 | 0.30443800  | H                    | -3.77514300 | 4.76889200  | 1.09009300  |
| C | 0.79618500  | -0.71251100 | 1.32400800  | H                    | -1.36190400 | 4.70852500  | 1.74644800  |
| H | 0.47111500  | 0.32163400  | 1.32757800  | C                    | -5.12676500 | 0.40558300  | -0.20936200 |
| C | 1.59208600  | -3.36302600 | 1.24631000  | C                    | -7.80279700 | 0.68416900  | -0.97505900 |
|   |             |             |             | C                    | -5.85621100 | -0.72046800 | -0.64288700 |

|                      |             |             |             |                 |             |             |             |
|----------------------|-------------|-------------|-------------|-----------------|-------------|-------------|-------------|
| C                    | -5.77539400 | 1.65890700  | -0.16061400 | C               | -3.19074500 | -2.45006800 | -0.31448600 |
| C                    | -7.10747100 | 1.80016200  | -0.54158600 | C               | -4.24219300 | -3.04054000 | -1.00813400 |
| C                    | -7.17530500 | -0.57452900 | -1.02108900 | C               | -5.61010500 | -1.09299000 | -0.61508600 |
| H                    | -5.36182100 | -1.68430400 | -0.66406400 | H               | -4.69090700 | 0.48720100  | 0.53147500  |
| H                    | -7.56452000 | 2.78140600  | -0.48358500 | H               | -2.24155400 | -2.96586800 | -0.20435000 |
| H                    | -7.73265100 | -1.44288700 | -1.35337100 | H               | -4.10865400 | -4.02900000 | -1.43627500 |
| H                    | -8.84028400 | 0.78275600  | -1.27424600 | H               | -6.55162600 | -0.56424600 | -0.72277200 |
| O                    | -5.13012200 | 2.76707600  | 0.27849500  | H               | -6.26994200 | -2.82912300 | -1.70975700 |
| N                    | 3.70484200  | 0.43829500  | 0.11384800  | C               | -1.46388400 | -1.35438400 | 1.78705600  |
| C                    | 3.15172000  | 1.65702600  | -0.31609700 | C               | 0.14902500  | -2.88665500 | 3.48238200  |
| C                    | 2.15531700  | 4.16287800  | -1.12021600 | C               | -0.07786300 | -1.14647900 | 1.81744500  |
| C                    | 1.80773200  | 1.81051600  | -0.66430600 | C               | -2.03792600 | -2.33805000 | 2.60360200  |
| C                    | 3.98580400  | 2.78639100  | -0.37558200 | C               | -1.23035100 | -3.10119000 | 3.43929700  |
| C                    | 3.50310100  | 4.01877000  | -0.77871800 | C               | 0.71782700  | -1.90548200 | 2.67050700  |
| C                    | 1.31532900  | 3.05753400  | -1.05965200 | H               | 0.36565200  | -0.38452100 | 1.18162700  |
| H                    | 1.14537800  | 0.95183700  | -0.62600200 | H               | -3.11239400 | -2.49100000 | 2.58311800  |
| H                    | 4.19275600  | 4.85583800  | -0.80935900 | H               | -1.68382200 | -3.85656100 | 4.07299600  |
| H                    | 0.26588400  | 3.15003000  | -1.32197700 | H               | 1.79008300  | -1.73317300 | 2.68907700  |
| H                    | 1.77730200  | 5.13043100  | -1.43207700 | H               | 0.77275000  | -3.47604000 | 4.14622800  |
| C                    | 5.10524700  | 0.30029800  | 0.05245900  | C               | 1.46324100  | -1.35496800 | -1.78708000 |
| C                    | 7.90904500  | 0.15377500  | -0.03176800 | C               | -0.15041000 | -2.88644900 | -3.48239200 |
| C                    | 5.88962100  | 1.46122000  | -0.01604000 | C               | 2.03680100  | -2.33896100 | -2.60357400 |
| C                    | 5.75100900  | -0.93648600 | 0.07805400  | C               | 0.07733300  | -1.14632900 | -1.81751700 |
| C                    | 7.14577000  | -1.00558900 | 0.04279200  | C               | -0.71872600 | -1.90495600 | -2.67056200 |
| C                    | 7.27068400  | 1.39610200  | -0.06696500 | C               | 1.22885500  | -3.10170100 | -3.43927200 |
| H                    | 5.16094600  | -1.84458200 | 0.13425800  | H               | 3.11118700  | -2.49247100 | -2.58305500 |
| H                    | 7.62672400  | -1.97755900 | 0.07182400  | H               | -0.36580100 | -0.38412800 | -1.18172600 |
| H                    | 7.82919000  | 2.32474000  | -0.12121900 | H               | -1.79089400 | -1.73210200 | -2.68915700 |
| H                    | 8.99185800  | 0.10220400  | -0.06153600 | H               | 1.68195200  | -3.85733000 | -4.07293000 |
| O                    | 5.30407000  | 2.71086800  | 0.01709200  | H               | -0.77442900 | -3.47553500 | -4.14622500 |
| <b>p-DPA-DPS-DPA</b> |             |             |             | C               | 3.35037000  | -1.17393000 | -0.23727100 |
| S                    | 0.00109000  | 4.65312500  | 0.00004100  | C               | 5.45266100  | -2.36843500 | 1.16542600  |
| O                    | -0.40314800 | 5.36874500  | -1.18677100 | C               | 3.18960700  | -2.45155100 | 0.31433700  |
| O                    | 0.40568000  | 5.36849600  | 1.18687800  | C               | 4.56861200  | -0.49840100 | -0.08829000 |
| C                    | -1.18273200 | 3.46040800  | 0.41333700  | C               | 5.60952700  | -1.09551900 | 0.61517800  |
| C                    | -2.00118500 | 0.79506300  | 0.77960500  | C               | 4.24076700  | -3.04252600 | 1.00798600  |
| C                    | -1.08753900 | 2.84763400  | 1.70209100  | H               | 2.24020300  | -2.96693900 | 0.20411000  |
| C                    | -1.83368000 | 2.75253200  | -0.64803500 | H               | 4.69105500  | 0.48516400  | -0.53128600 |
| C                    | -2.22209500 | 1.45028400  | -0.46706800 | H               | 6.55126400  | -0.56718000 | 0.72296100  |
| C                    | -1.48434200 | 1.54867600  | 1.87314500  | H               | 4.10678500  | -4.03096700 | 1.43603200  |
| H                    | -0.68192600 | 3.41963200  | 2.52988300  | H               | 6.26856900  | -2.83203400 | 1.70972700  |
| H                    | -1.96524000 | 3.24180000  | -1.60735300 | <b>DBTO-PXZ</b> |             |             |             |
| H                    | -2.67346600 | 0.90052200  | -1.28810800 | C               | -0.71386800 | 1.54453500  | -0.03305900 |
| H                    | -1.41235800 | 1.07896400  | 2.84922800  | C               | -3.50799200 | 2.03825500  | -0.04971100 |
| C                    | 1.18440200  | 3.45991800  | -0.41330600 | C               | -1.25996100 | 2.86754600  | -0.06951200 |
| C                    | 2.00155800  | 0.79418900  | -0.77960000 | C               | -1.61859100 | 0.46491800  | -0.00454100 |
| C                    | 1.83504500  | 2.75172200  | 0.64807400  | C               | -2.97299200 | 0.72329100  | -0.01362700 |
| C                    | 1.08895200  | 2.84721200  | -1.70210700 | C               | -2.63295500 | 3.11320600  | -0.07772900 |
| C                    | 1.48508000  | 1.54806700  | -1.87316100 | H               | -1.26946000 | -0.56420000 | 0.02300500  |
| C                    | 2.22280400  | 1.44929400  | 0.46709600  | H               | -3.01172000 | 4.13118200  | -0.10621500 |
| H                    | 1.96687600  | 3.24092300  | 1.60738900  | H               | -4.58319600 | 2.18035800  | -0.05521400 |
| H                    | 0.68367700  | 3.41944000  | -2.52990600 | S               | 0.00001100  | 4.06872900  | -0.10678800 |
| H                    | 1.41292300  | 1.07841300  | -2.84925800 | O               | -0.00012000 | 4.83577600  | -1.34866400 |
| H                    | 2.67389800  | 0.89930300  | 1.28813500  | O               | 0.00014000  | 4.91500500  | 1.08232900  |
| N                    | -2.28304100 | -0.56202600 | 0.94191000  | C               | 1.25998600  | 2.86754300  | -0.06978300 |
| N                    | 2.28277500  | -0.56301900 | -0.94192900 | C               | 2.97302100  | 0.72328400  | -0.01415500 |
| C                    | -3.35093600 | -1.17242900 | 0.23724500  | C               | 0.71389600  | 1.54453300  | -0.03320400 |
| C                    | -5.45380900 | -2.36592200 | -1.16545500 | C               | 2.63297900  | 3.11319600  | -0.07832100 |
| C                    | -4.56890000 | -0.49637600 | 0.08838500  | C               | 3.50801800  | 2.03824400  | -0.05044700 |

|                  |             |             |             |   |             |             |             |
|------------------|-------------|-------------|-------------|---|-------------|-------------|-------------|
| C                | 1.61862100  | 0.46491700  | -0.00476300 | O | -0.00000500 | 5.16175500  | -1.22204700 |
| H                | 3.01174000  | 4.13117000  | -0.10694500 | C | -1.26320600 | 3.16517800  | -0.00004500 |
| H                | 4.58322000  | 2.18034200  | -0.05623000 | C | -2.97419800 | 1.02274700  | -0.00001500 |
| H                | 1.26949000  | -0.56419700 | 0.02297000  | C | -0.71229000 | 1.84271200  | -0.00002500 |
| N                | 3.88708900  | -0.38581400 | 0.01182400  | C | -2.62965300 | 3.41113600  | -0.00004900 |
| N                | -3.88706100 | -0.38580600 | 0.01240800  | C | -3.51091900 | 2.33527600  | -0.00003400 |
| C                | 4.32811500  | -0.95234200 | -1.17830300 | C | -1.62141700 | 0.76214400  | -0.00001100 |
| C                | 5.26528300  | -2.16918900 | -3.52540700 | H | -3.00367500 | 4.43131300  | -0.00006300 |
| C                | 5.22167300  | -2.04134200 | -1.12802000 | H | -4.58585400 | 2.47777000  | -0.00003500 |
| C                | 3.91429400  | -0.48177000 | -2.43386900 | H | -1.27500700 | -0.26836600 | 0.00000600  |
| C                | 4.38133000  | -1.08711200 | -3.59272200 | N | -3.89248700 | -0.08914300 | 0.00000900  |
| C                | 5.68571300  | -2.64576700 | -2.28773600 | N | 3.89248700  | -0.08914000 | -0.00000800 |
| H                | 3.22950700  | 0.35674300  | -2.48477200 | C | -4.33108500 | -0.59916700 | 1.21813600  |
| H                | 4.05349500  | -0.71157600 | -4.55566900 | C | -5.16693600 | -1.59229300 | 3.69583000  |
| H                | 6.37091700  | -3.48150900 | -2.19738600 | C | -5.22361000 | -1.69237000 | 1.25846300  |
| H                | 5.62643400  | -2.63888500 | -4.43333700 | C | -3.87263000 | -0.01217100 | 2.41909400  |
| C                | 4.35863900  | -0.87124700 | 1.22581000  | C | -4.28969500 | -0.50621900 | 3.64156700  |
| C                | 5.35584500  | -1.92799400 | 3.62497600  | C | -5.61848500 | -2.16506100 | 2.51109200  |
| C                | 3.97503200  | -0.31773400 | 2.45684500  | H | -3.19375900 | 0.83038300  | 2.37719900  |
| C                | 5.25198200  | -1.96151800 | 1.22631900  | H | -3.93028600 | -0.04287500 | 4.55413900  |
| C                | 5.74581200  | -2.48680100 | 2.41202000  | H | -6.30101500 | -3.00769600 | 2.56515900  |
| C                | 4.47187200  | -0.84394400 | 3.64171200  | H | -5.49738800 | -1.98725500 | 4.65048300  |
| H                | 3.29005500  | 0.52210800  | 2.46836300  | C | -4.33121300 | -0.59911600 | -1.21809400 |
| H                | 6.42951400  | -3.32709100 | 2.36092000  | C | -5.16731100 | -1.59215400 | -3.69574100 |
| H                | 4.16742200  | -0.40478700 | 4.58520600  | C | -3.87286500 | -0.01208700 | -2.41907800 |
| H                | 5.74046300  | -2.33557100 | 4.55307400  | C | -5.22374800 | -1.69231200 | -1.25837200 |
| C                | -4.32879500 | -0.95178200 | -1.17772300 | C | -5.61874600 | -2.16496100 | -2.51097700 |
| C                | -5.26735700 | -2.16753200 | -3.52484100 | C | -4.29005600 | -0.50608900 | -3.64152700 |
| C                | -5.22237100 | -2.04076500 | -1.12742000 | H | -3.19397400 | 0.83045300  | -2.37722100 |
| C                | -3.91565000 | -0.48068100 | -2.43331400 | H | -6.30128100 | -3.00759500 | -2.56500500 |
| C                | -4.38337900 | -1.08547800 | -3.59217400 | H | -3.93072900 | -0.04272100 | -4.55411800 |
| C                | -5.68710300 | -2.64464700 | -2.28714400 | H | -5.49785800 | -1.98708200 | -4.65037500 |
| H                | -3.23083600 | 0.35781100  | -2.48423200 | C | 4.33107200  | -0.59921500 | -1.21811900 |
| H                | -4.05606300 | -0.70953300 | -4.55513800 | C | 5.16687900  | -1.59246500 | -3.69578200 |
| H                | -6.37229500 | -3.48039900 | -2.19677800 | C | 5.22359800  | -1.69241900 | -1.25841100 |
| H                | -5.62905100 | -2.63680100 | -4.43277700 | C | 3.87260000  | -0.01227600 | -2.41909900 |
| C                | -4.35794800 | -0.87175900 | 1.22644200  | C | 4.28964500  | -0.50638400 | -3.64155600 |
| C                | -5.35384900 | -1.92951700 | 3.62570800  | C | 5.61844700  | -2.16517600 | -2.51102400 |
| C                | -3.97366600 | -0.31877100 | 2.45750200  | H | 3.19373000  | 0.83028100  | -2.37723400 |
| C                | -5.25131900 | -1.96201000 | 1.22697500  | H | 3.93022100  | -0.04308300 | -4.55414400 |
| C                | -5.74449900 | -2.48779400 | 2.41272500  | H | 5.49731100  | -1.98747500 | -4.65042200 |
| C                | -4.46985700 | -0.84548300 | 3.64241900  | C | 4.33122700  | -0.59906300 | 1.21811000  |
| H                | -3.28868200 | 0.52106600  | 2.46899700  | C | 5.16737100  | -1.59198200 | 3.69579100  |
| H                | -6.42824900 | -3.32804600 | 2.36164300  | C | 3.87289600  | -0.01198100 | 2.41907400  |
| H                | -4.16488800 | -0.40672900 | 4.58593400  | C | 5.22376300  | -1.69225800 | 1.25842500  |
| H                | -5.73796000 | -2.33748700 | 4.55384300  | C | 5.61878800  | -2.16484300 | 2.51104700  |
| O                | 5.66330000  | -2.54636000 | 0.06211300  | C | 4.29010800  | -0.50592500 | 3.64154000  |
| O                | -5.66331500 | -2.54632200 | 0.06274200  | H | 3.19400300  | 0.83055700  | 2.37718900  |
| <b>DBTO-DMAC</b> |             |             |             | H | 6.30133100  | -3.00746900 | 2.56510400  |
| C                | 0.71228800  | 1.84271300  | -0.00002800 | H | 3.93079500  | -0.04251500 | 4.55411600  |
| C                | 3.51091700  | 2.33527900  | -0.00003900 | H | 5.49793700  | -1.98686200 | 4.65043900  |
| C                | 1.26320300  | 3.16517900  | -0.00004900 | C | -5.75655900 | -2.36177100 | 0.00005800  |
| C                | 1.62141600  | 0.76214600  | -0.00000900 | C | -7.30055000 | -2.27506500 | 0.00014200  |
| C                | 2.97419800  | 1.02275000  | -0.00001600 | H | -7.71419700 | -2.76783900 | 0.88382200  |
| C                | 2.62965000  | 3.41113900  | -0.00005500 | H | -7.71429000 | -2.76777900 | -0.88352700 |
| H                | 1.27500800  | -0.26836500 | 0.00000600  | H | -7.62664900 | -1.23146300 | 0.00019500  |
| H                | 3.00367100  | 4.43131600  | -0.00007400 | C | -5.32680600 | -3.84742600 | -0.00000900 |
| H                | 4.58585300  | 2.47777400  | -0.00004500 | H | -5.71482800 | -4.35997000 | 0.88428500  |
| S                | -0.00000200 | 4.37465600  | -0.00006400 | H | -4.23665600 | -3.93250300 | -0.00005000 |
| O                | -0.00000100 | 5.16179200  | 1.22189500  | H | -5.71489000 | -4.35990600 | -0.88431300 |

|   |            |             |             |
|---|------------|-------------|-------------|
| H | 6.30096900 | -3.00782000 | -2.56506000 |
| C | 5.75656100 | -2.36177000 | 0.00001500  |
| C | 5.32680800 | -3.84742500 | 0.00013500  |
| H | 5.71492800 | -4.35988600 | 0.88443400  |
| H | 5.71479400 | -4.35998800 | -0.88416400 |
| H | 4.23665700 | -3.93250000 | 0.00022300  |
| C | 7.30055200 | -2.27506300 | -0.00008800 |
| H | 7.71430000 | -2.76773900 | 0.88360100  |
| H | 7.62665100 | -1.23146100 | -0.00018900 |
| H | 7.71419100 | -2.76787600 | -0.88374900 |

**TXO2-PXZ**

|   |             |             |             |
|---|-------------|-------------|-------------|
| C | 1.22790000  | -1.43534800 | -0.34404700 |
| C | 3.44955200  | -1.33830000 | 1.44527500  |
| C | 1.31077600  | -2.28168500 | 0.80782500  |
| C | 2.28080500  | -0.55367900 | -0.55154200 |
| C | 3.38225000  | -0.50868800 | 0.31236400  |
| C | 2.41053000  | -2.21117100 | 1.69197200  |
| H | 2.27151800  | 0.13308100  | -1.39166900 |
| H | 2.41298700  | -2.84406000 | 2.57297300  |
| H | 4.30242200  | -1.27720200 | 2.11491100  |
| S | -0.00000400 | -3.32674400 | 1.23912500  |
| O | -0.00000600 | -4.55525400 | 0.46016300  |
| O | -0.00000100 | -3.53022900 | 2.67935800  |
| C | -1.31078100 | -2.28168100 | 0.80783000  |
| C | -3.38225100 | -0.50867700 | 0.31236200  |
| C | -1.22790700 | -1.43534900 | -0.34404600 |
| C | -2.41053200 | -2.21115600 | 1.69197900  |
| C | -3.44955100 | -1.33828100 | 1.44527900  |
| C | -2.28080800 | -0.55367900 | -0.55154700 |
| H | -2.41299000 | -2.84403900 | 2.57298500  |
| H | -4.30241800 | -1.27717400 | 2.11491800  |
| H | -2.27151600 | 0.13307300  | -1.39168200 |
| C | -0.00000700 | -1.47493000 | -1.26020400 |
| C | -0.00002900 | -0.30251200 | -2.24877400 |
| H | 0.87652800  | -0.36229700 | -2.89889300 |
| H | -0.00001000 | 0.67077200  | -1.74713900 |
| H | -0.87662600 | -0.36228600 | -2.89884100 |
| C | -0.00001100 | -2.76179500 | -2.12615800 |
| H | -0.00000900 | -3.67142700 | -1.52865200 |
| H | 0.88954500  | -2.76108600 | -2.76522800 |
| H | -0.88957100 | -2.76108500 | -2.76522100 |
| N | 4.43600700  | 0.42474100  | 0.04818300  |
| C | 4.24976300  | 1.78037700  | 0.29936400  |
| C | 3.96043600  | 4.53340700  | 0.77091100  |
| C | 5.29286100  | 2.68456500  | 0.01186100  |
| C | 3.05972300  | 2.28693500  | 0.84585100  |
| C | 2.92120300  | 3.64908400  | 1.07541300  |
| C | 5.15072300  | 4.04561000  | 0.24088800  |
| H | 2.25793200  | 1.59933500  | 1.08854500  |
| H | 1.99609100  | 4.02268200  | 1.50054700  |
| H | 5.98332300  | 4.69826800  | 0.00219500  |
| H | 3.84766800  | 5.59648300  | 0.95182300  |
| C | 5.65251500  | -0.01473500 | -0.46819700 |
| C | 8.13502500  | -0.81261700 | -1.50521200 |
| C | 5.89836800  | -1.36483400 | -0.76119200 |
| C | 6.67267500  | 0.92339200  | -0.72182100 |
| C | 7.90171200  | 0.53155900  | -1.23243700 |
| C | 7.12931600  | -1.75497400 | -1.27142200 |
| H | 5.11512800  | -2.09280900 | -0.58555800 |

|   |             |             |             |
|---|-------------|-------------|-------------|
| H | 8.65324900  | 1.29297600  | -1.41018700 |
| H | 7.30306400  | -2.80258800 | -1.49086800 |
| H | 9.09467200  | -1.12209900 | -1.90383200 |
| O | 6.48916000  | 2.25821600  | -0.49052900 |
| N | -4.43600400 | 0.42475400  | 0.04817500  |
| C | -5.65252600 | -0.01472500 | -0.46816900 |
| C | -8.13506600 | -0.81261300 | -1.50510900 |
| C | -5.89839800 | -1.36483000 | -0.76112300 |
| C | -6.67268400 | 0.92340400  | -0.72179600 |
| C | -7.90173500 | 0.53156900  | -1.23237500 |
| C | -7.12936000 | -1.75497200 | -1.27131600 |
| H | -5.11516000 | -2.09280700 | -0.58548800 |
| H | -8.65326800 | 1.29298800  | -1.41013000 |
| H | -7.30312100 | -2.80259000 | -1.49073100 |
| H | -9.09472400 | -1.12209600 | -1.90370000 |
| C | -4.24974100 | 1.78039600  | 0.29931100  |
| C | -3.96037800 | 4.53343900  | 0.77076500  |
| C | -5.29283700 | 2.68458500  | 0.01180300  |
| C | -3.05968600 | 2.28696100  | 0.84575800  |
| C | -2.92114700 | 3.64911500  | 1.07527300  |
| C | -5.15068100 | 4.04563600  | 0.24078400  |
| H | -2.25789500 | 1.59936100  | 1.08845700  |
| H | -1.99602200 | 4.02271800  | 1.50037500  |
| H | -5.98328000 | 4.69829400  | 0.00208900  |
| H | -3.84759600 | 5.59651900  | 0.95164100  |
| O | -6.48915200 | 2.25823200  | -0.49054400 |

**TXO2-DMAC**

|   |             |             |             |
|---|-------------|-------------|-------------|
| C | 1.22692000  | -1.69337800 | -0.30070400 |
| C | 3.44562600  | -1.59323900 | 1.49059800  |
| C | 1.31049700  | -2.54300900 | 0.84909600  |
| C | 2.27602900  | -0.80502400 | -0.50207500 |
| C | 3.37558100  | -0.75865800 | 0.36215500  |
| C | 2.40916200  | -2.47020900 | 1.73457200  |
| H | 2.26411600  | -0.11287500 | -1.33770500 |
| H | 2.41350200  | -3.10568300 | 2.61374900  |
| H | 4.29892500  | -1.53207000 | 2.15968800  |
| S | 0.00000000  | -3.58867600 | 1.27866700  |
| O | -0.00000300 | -4.81697300 | 0.49867500  |
| O | 0.00000100  | -3.79496500 | 2.17886400  |
| C | -1.31049600 | -2.54300500 | 0.84910000  |
| C | -3.37558000 | -0.75865400 | 0.36215800  |
| C | -1.22691900 | -1.69337500 | -0.30070000 |
| C | -2.40915900 | -2.47020200 | 1.73457800  |
| C | -3.44562200 | -1.59323100 | 1.49060400  |
| C | -2.27603000 | -0.80502300 | -0.50207500 |
| H | -2.41349900 | -3.10567500 | 2.61375600  |
| H | -4.29892000 | -1.53206100 | 2.15969500  |
| H | -2.26411800 | -0.11288000 | -1.33771000 |
| C | -0.00000200 | -1.73317300 | -1.21792200 |
| C | -0.00000400 | -0.56019300 | -2.20570500 |
| H | 0.87691500  | -0.61979200 | -2.85544300 |
| H | 0.00004900  | 0.41258200  | -1.70331400 |
| H | -0.87698000 | -0.61973600 | -2.85537100 |
| C | -0.00000600 | -3.01941400 | -2.08464100 |
| H | 0.00000600  | -3.92946800 | -1.48777000 |
| H | 0.88962000  | -3.01821700 | -2.72372700 |
| H | -0.88964900 | -3.01822600 | -2.72370400 |
| N | 4.42629700  | 0.18504000  | 0.10361800  |

|   |             |             |             |                 |             |             |             |
|---|-------------|-------------|-------------|-----------------|-------------|-------------|-------------|
| N | -4.42629600 | 0.18504200  | 0.10361900  | <b>Cz-TTR</b>   |             |             |             |
| C | -4.23408200 | 1.52149000  | 0.44564700  | H               | 0.96178000  | -2.57448100 | -1.93650700 |
| C | -3.77921100 | 4.19646400  | 1.13777500  | C               | 0.60625900  | -1.69899800 | -1.40372900 |
| C | -3.02941000 | 1.90789600  | 1.07657100  | C               | -0.27742900 | 0.54489000  | 0.02240900  |
| C | -5.23245000 | 2.48479400  | 0.18058900  | C               | 1.51696900  | -0.74083100 | -0.97440700 |
| C | -4.97175800 | 3.80958900  | 0.53417800  | C               | -0.75153700 | -1.52058700 | -1.15873000 |
| C | -2.80849800 | 3.23089800  | 1.41395200  | C               | -1.20139400 | -0.40261900 | -0.44682500 |
| H | -2.28060300 | 1.15857900  | 1.30107800  | C               | 1.06572900  | 0.37815700  | -0.26388900 |
| H | -5.72574400 | 4.56550300  | 0.33674800  | H               | -1.46750900 | -2.24623800 | -1.52791300 |
| H | -1.87862500 | 3.50873100  | 1.89901800  | H               | -0.60266600 | 1.38222200  | 0.63132600  |
| H | -3.61418700 | 5.23649500  | 1.39785500  | S               | 3.22910000  | -0.97304300 | -1.35398800 |
| C | -5.60802100 | -0.25941500 | -0.48878700 | O               | 3.46269500  | -2.38273400 | -1.52497800 |
| C | -7.95889000 | -1.21788500 | -1.66603900 | O               | 3.60551800  | -0.07111000 | -2.40883700 |
| C | -5.73513100 | -1.62307200 | -0.83438700 | S               | 2.19357800  | 1.62318900  | 0.31811800  |
| C | -6.66310100 | 0.63907900  | -0.75584700 | O               | 2.60263500  | 2.42955500  | -0.79962400 |
| C | -7.82310300 | 0.12796300  | -1.34076300 | O               | 1.60365000  | 2.26238500  | 1.46388900  |
| C | -6.90071700 | -2.09332100 | -1.41246600 | C               | 3.57612500  | 0.65685600  | 0.86869000  |
| H | -4.91131800 | -2.30003500 | -0.64641400 | C               | 5.77547400  | -0.78768100 | 1.75692700  |
| H | -8.64723100 | 0.80227100  | -1.55304400 | C               | 4.02298300  | -0.45700700 | 0.14818700  |
| H | -6.98178600 | -3.14423300 | -1.66891900 | C               | 4.21573500  | 1.04010300  | 2.04006700  |
| H | -8.87667000 | -1.57753100 | -2.11868800 | C               | 5.33064200  | 0.31968200  | 2.47337800  |
| C | 4.23408300  | 1.52148700  | 0.44564900  | C               | 5.11220400  | -1.19182100 | 0.59655000  |
| C | 3.77921100  | 4.19646000  | 1.13778500  | H               | 3.83738600  | 1.88558400  | 2.60462700  |
| C | 3.02941100  | 1.90789100  | 1.07657600  | H               | 5.42655300  | -2.07187400 | 0.04572000  |
| C | 5.23245000  | 2.48479200  | 0.18059300  | H               | 6.63185100  | -1.35364200 | 2.10640300  |
| C | 4.97175700  | 3.80958700  | 0.53418500  | H               | 5.83929000  | 0.61971600  | 3.38281800  |
| C | 2.80849900  | 3.23089300  | 1.41396100  | N               | -2.56364700 | -0.23273400 | -0.17620000 |
| H | 2.28060500  | 1.15857300  | 1.30108400  | C               | -3.27518200 | 0.97248900  | -0.31268600 |
| H | 5.72574300  | 4.56550200  | 0.33675700  | C               | -5.19748700 | 3.01727200  | -0.41888200 |
| H | 1.87862700  | 3.50872400  | 1.89902900  | C               | -2.87961100 | 2.18400800  | -0.78880100 |
| H | 3.61418600  | 5.23649100  | 1.39786700  | C               | -4.65470900 | 0.70699000  | 0.09909300  |
| C | 5.60802100  | -0.25941500 | -0.48879000 | C               | -5.61721500 | 1.79650600  | 0.04967300  |
| C | 7.95889000  | -1.21788100 | -1.66604900 | C               | -3.86440500 | 3.23068100  | -0.84412000 |
| C | 6.66310200  | 0.63908000  | -0.75584800 | H               | -1.86949700 | 2.37592500  | -1.13149000 |
| C | 5.73513100  | -1.62307000 | -0.83439600 | H               | -6.63813500 | 1.63089500  | 0.37446700  |
| C | 6.90071600  | -2.09331800 | -1.41248000 | H               | -3.57046700 | 4.20358700  | -1.21927400 |
| C | 7.82310400  | 0.12796600  | -1.34076700 | H               | -5.89906900 | 3.84380000  | -0.46923300 |
| H | 4.91131800  | -2.30003400 | -0.64642600 | C               | -3.43853600 | -1.23065600 | 0.28632400  |
| H | 6.98178500  | -3.14422800 | -1.66893800 | C               | -5.60570100 | -2.73701700 | 1.24913600  |
| H | 8.64723100  | 0.80227500  | -1.55304600 | C               | -4.75561200 | -0.60977000 | 0.44187500  |
| H | 8.87667000  | -1.57752500 | -2.11870000 | C               | -3.20482200 | -2.52869900 | 0.62396800  |
| C | 6.57079300  | 2.12661400  | -0.44905900 | C               | -4.31257200 | -3.29776800 | 1.12009200  |
| C | 7.70353500  | 2.51076200  | 0.53109000  | C               | -5.85777600 | -1.42700900 | 0.92309600  |
| H | 7.67710300  | 3.58130400  | 0.75082300  | H               | -2.22511600 | -2.98448500 | 0.54409100  |
| H | 8.68087700  | 2.28006500  | 0.09909700  | H               | -4.14732700 | -4.33226800 | 1.39651100  |
| H | 7.60108800  | 1.96112500  | 1.47076500  | H               | -6.84729500 | -0.99539500 | 1.02184600  |
| C | 6.73949100  | 2.92099800  | -1.76500600 | H               | -6.41187400 | -3.36432100 | 1.61594900  |
| H | 6.69319100  | 3.99658700  | -1.57487000 |                 |             |             |             |
| H | 5.95018700  | 2.65996300  | -2.47530500 | <b>DMAC-TTR</b> |             |             |             |
| H | 7.70643300  | 2.70237100  | -2.22574800 | N               | -2.17147600 | -0.21875800 | -0.50744500 |
| C | -6.57079300 | 2.12661400  | -0.44906300 | C               | -3.18256300 | -1.20910000 | -0.33501900 |
| C | -7.70353400 | 2.51076500  | 0.53108400  | C               | -5.22071700 | -3.03975200 | -0.00006300 |
| H | -7.67710100 | 3.58130800  | 0.75081500  | C               | -4.18871000 | -0.92688500 | 0.60272700  |
| H | -7.60108900 | 1.96113100  | 1.47076100  | C               | -3.20656400 | -2.35626700 | -1.12952100 |
| H | -8.68087700 | 2.28007000  | 0.09909100  | C               | -4.23009200 | -3.28136300 | -0.94882000 |
| C | -6.73948900 | 2.92099400  | -1.76501200 | C               | -5.20362200 | -1.86799800 | 0.76023400  |
| H | -6.69319100 | 3.99658300  | -1.57488100 | C               | -2.69222100 | 1.11185000  | -0.57961400 |
| H | -7.70643100 | 2.70236400  | -2.22575600 | C               | -3.81588300 | 3.63253100  | -0.68348600 |
| H | -5.95018400 | 2.65995700  | -2.47531000 | C               | -2.31344200 | 1.98682400  | -1.59729800 |
|   |             |             |             | C               | -3.67574000 | 1.44763100  | 0.36435200  |

|                |             |             |             |                |             |             |             |
|----------------|-------------|-------------|-------------|----------------|-------------|-------------|-------------|
| C              | -4.22052800 | 2.72887100  | 0.30000800  | O              | 1.61992400  | -0.44252900 | -2.73744000 |
| C              | -2.87493700 | 3.25902400  | -1.63961600 | C              | 3.54393800  | 0.18448900  | -1.07317600 |
| C              | -4.08513000 | 0.38340000  | 1.38156700  | C              | 5.58682500  | 1.96736500  | -0.43433900 |
| C              | -5.39696200 | 0.73523000  | 2.08448700  | C              | 3.98915300  | 0.30149900  | 0.25568000  |
| C              | -2.97813000 | 0.25209400  | 2.45728200  | C              | 4.11106400  | 0.97352500  | -2.07243100 |
| H              | -6.02427400 | -3.75529200 | 0.13921800  | C              | 5.14432700  | 1.84998400  | -1.75476800 |
| H              | -2.44457600 | -2.50264500 | -1.88838900 | C              | 4.99837400  | 1.20904900  | 0.57335800  |
| H              | -4.25972100 | -4.17675600 | -1.55995700 | H              | 3.73069200  | 0.89149200  | -3.08535700 |
| H              | -5.99854000 | -1.69236300 | 1.47609000  | H              | 5.30623800  | 1.30876600  | 1.60910500  |
| H              | -4.25538400 | 4.62397100  | -0.71300600 | H              | 6.38482600  | 2.65990900  | -0.18779600 |
| H              | -1.61095300 | 1.66605600  | -2.35876000 | H              | 5.59761700  | 2.45089000  | -2.53615300 |
| H              | -4.97798900 | 3.03085300  | 1.01420900  | N              | -2.50444400 | 0.09025700  | 0.22413900  |
| H              | -2.58386000 | 3.94737800  | -2.42527300 | C              | -3.32133100 | -1.00999100 | 0.04213300  |
| H              | -5.65454200 | -0.03861400 | 2.81195100  | C              | -5.05379000 | -3.16765400 | -0.36557900 |
| H              | -6.22428000 | 0.84185000  | 1.37629000  | C              | -2.83460600 | -2.33049800 | 0.13652500  |
| H              | -5.28900800 | 1.66866600  | 2.64220600  | C              | -4.68962900 | -0.80758300 | -0.24572700 |
| H              | -2.00541600 | 0.00726900  | 2.02241100  | C              | -5.55343400 | -1.88070200 | -0.45291100 |
| H              | -2.88062800 | 1.19709300  | 2.99958700  | C              | -3.69533500 | -3.38845500 | -0.06605600 |
| H              | -3.24622500 | -0.53581200 | 3.16734200  | H              | -1.78859600 | -2.49239900 | 0.36763900  |
| C              | -0.82333700 | -0.51178600 | -0.50188200 | H              | -6.59453700 | -1.67626400 | -0.67510700 |
| C              | 1.90363200  | -1.26137200 | -0.49763500 | H              | -3.31693900 | -4.40155000 | 0.00661000  |
| C              | -0.40637000 | -1.89004500 | -0.17713700 | H              | -5.71558500 | -4.01137000 | -0.52580800 |
| C              | 0.15773300  | 0.47191500  | -0.67885200 | C              | -3.03914500 | 1.36258500  | 0.15456600  |
| C              | 1.50488200  | 0.13466300  | -0.73244800 | C              | -4.21011600 | 3.89541500  | -0.01878800 |
| C              | 0.92798000  | -2.21214300 | -0.17263300 | C              | -4.41540900 | 1.51545000  | -0.12202100 |
| H              | -1.13643900 | -2.61793300 | 0.14500500  | C              | -2.24851600 | 2.51609500  | 0.33756500  |
| H              | -0.09884500 | 1.51983300  | -0.76740800 | C              | -2.83485600 | 3.76167300  | 0.25296200  |
| H              | 1.25128200  | -3.20815500 | 0.11162000  | C              | -5.00126000 | 2.77651000  | -0.20902200 |
| S              | 3.58988700  | -1.70236900 | -0.40612900 | H              | -1.19023800 | 2.40192100  | 0.53989600  |
| O              | 3.70697200  | -2.93261500 | 0.34024200  | H              | -2.22511900 | 4.64665300  | 0.39402700  |
| O              | 4.18807300  | -1.63345800 | -1.71203200 | H              | -6.06097000 | 2.84486600  | -0.42658100 |
| S              | 2.68777200  | 1.37372100  | -0.92688700 | H              | -4.65407800 | 4.88237900  | -0.08442300 |
| O              | 3.38796900  | 1.24812700  | -2.17939300 | O              | -5.21278300 | 0.43962400  | -0.32386600 |
| O              | 2.08023800  | 2.64912600  | -0.61574600 | <b>PTZ-TTR</b> |             |             |             |
| C              | 3.81848900  | 0.95266700  | 0.37108700  | H              | -5.21254200 | -1.81825800 | 1.71065000  |
| C              | 5.54517800  | 0.32396200  | 2.46875200  | C              | -4.96793400 | -0.77320800 | 1.55230300  |
| C              | 4.20827800  | -0.38012400 | 0.59535100  | C              | -4.23409700 | 1.90277300  | 1.16009800  |
| C              | 4.28192100  | 1.96215800  | 1.21264500  | C              | -4.07893700 | -0.43342100 | 0.53434000  |
| C              | 5.15936600  | 1.64811500  | 2.24638900  | C              | -5.52009900 | 0.22922900  | 2.34428400  |
| C              | 5.05385400  | -0.69458900 | 1.65765300  | C              | -5.15343700 | 1.56276400  | 2.14840000  |
| H              | 3.94593400  | 2.98013200  | 1.04530800  | C              | -3.70840500 | 0.90900500  | 0.33701500  |
| H              | 5.53462300  | 2.43802300  | 2.88848200  | H              | -6.22741700 | -0.03203400 | 0.312403800 |
| H              | 5.31283400  | -1.73320100 | 1.83443800  | H              | -5.57628400 | 2.33995000  | 2.77623800  |
| H              | 6.21959100  | 0.08280300  | 3.28338100  | H              | -3.91288500 | 2.92889800  | 1.01499200  |
| <b>PXZ-TTR</b> |             |             |             | S              | -3.38415600 | -1.73544400 | -0.44356000 |
| H              | 1.02482600  | -0.00412600 | 3.18661200  | O              | -3.51059100 | -2.97293100 | 0.28869600  |
| C              | 0.65644500  | -0.13114400 | 2.17337600  | O              | -3.91841400 | -1.66932100 | -1.77695800 |
| C              | -0.22682500 | -0.37325500 | -0.49478900 | S              | -2.52698000 | 1.36354600  | -0.90321000 |
| C              | 1.57565400  | -0.47913100 | 1.16938100  | O              | -3.16301100 | 1.22900300  | -2.18837700 |
| C              | -0.68089300 | 0.04772000  | 1.88838600  | O              | -1.96291600 | 2.64980800  | -0.55805200 |
| C              | -1.10645700 | -0.08591400 | 0.52728100  | C              | -1.32667600 | 0.14939000  | -0.65776200 |
| C              | 1.11841400  | -0.60130300 | -0.20077300 | C              | 0.60062100  | -1.84069200 | -0.03529900 |
| H              | -1.39732200 | 0.29352100  | 2.66454300  | C              | -1.70544000 | -1.25843700 | -0.45100700 |
| H              | -0.56343100 | -0.42605800 | -1.52701700 | C              | 0.00827200  | 0.51486700  | -0.54710700 |
| S              | 3.24933900  | -0.64114500 | 1.56299900  | C              | 1.00018300  | -0.44950800 | -0.33197900 |
| O              | 3.50755200  | 0.03604000  | 2.81622000  | C              | -0.72499500 | -2.19123800 | -0.09023100 |
| O              | 3.70370500  | -2.00423900 | 1.43693400  | H              | 0.24631800  | 1.56814600  | -0.62427000 |
| S              | 2.21696200  | -0.90762200 | -1.50239800 | H              | -1.03906200 | -3.19595000 | 0.17292500  |
| O              | 2.71377100  | -2.26071300 | -1.47482100 | H              | 1.33366000  | -2.55320900 | 0.31409400  |
|                |             |             |             | N              | 2.34367600  | -0.13465600 | -0.28340100 |



|   |            |             |             |
|---|------------|-------------|-------------|
| C | 3.35187700 | -1.13166200 | -0.16233600 |
| C | 5.31407600 | -3.06923600 | 0.16809400  |
| C | 3.39596100 | -2.22604000 | -1.03114900 |
| C | 4.32563300 | -0.97123800 | 0.83338100  |
| C | 5.30316400 | -1.95248500 | 0.99971200  |
| C | 4.37242400 | -3.19914900 | -0.85502900 |
| H | 2.66440400 | -2.30090600 | -1.82960600 |
| H | 6.05639700 | -1.82935000 | 1.77111000  |
| H | 4.40402500 | -4.05325500 | -1.52228900 |
| H | 6.07827400 | -3.82719300 | 0.30237700  |
| C | 2.83415400 | 1.20616800  | -0.33234100 |
| C | 3.80051500 | 3.81190200  | -0.31224500 |
| C | 2.48577900 | 2.08106700  | -1.36403900 |
| C | 3.73385400 | 1.60708400  | 0.66391800  |
| C | 4.20448300 | 2.92113400  | 0.67652300  |
| C | 2.96120500 | 3.38657100  | -1.34393700 |
| H | 1.85200000 | 1.73396600  | -2.17310500 |
| H | 4.90038500 | 3.22983300  | 1.44983000  |
| H | 2.68081400 | 4.06890600  | -2.13845500 |
| H | 4.16877000 | 4.83196200  | -0.29664500 |
| S | 4.28512200 | 0.44969700  | 1.87100800  |

**Cz-Ph-TTR**

|   |             |             |             |
|---|-------------|-------------|-------------|
| H | 3.16680800  | 2.85595300  | 1.63227900  |
| C | 2.73400700  | 1.93426000  | 1.25786900  |
| C | 1.67972900  | -0.43982400 | 0.17543200  |
| C | 3.59435000  | 0.87093700  | 0.92121900  |
| C | 1.37602400  | 1.80908700  | 1.10863200  |
| C | 0.76971500  | 0.60496400  | 0.56902500  |
| C | 3.02439600  | -0.31979600 | 0.37224100  |
| H | 0.75801300  | 2.65269400  | 1.38576700  |
| H | 1.32544900  | -1.35115700 | -0.29063200 |
| S | 5.31667700  | 1.06313200  | 1.12176800  |
| O | 5.62259100  | 2.47221500  | 1.08749200  |
| O | 5.79458500  | 0.28428700  | 2.23287200  |
| S | 4.05094200  | -1.68064200 | -0.09374100 |
| O | 4.55179500  | -2.32745700 | 1.08771400  |
| O | 3.35487900  | -2.46937600 | -1.07892300 |
| C | 5.39759200  | -0.84993700 | -0.90002000 |
| C | 7.51962700  | 0.39740100  | -2.18682500 |
| C | 5.94075500  | 0.32948100  | -0.37489000 |
| C | 5.90195300  | -1.39633900 | -2.07369200 |
| C | 6.97856100  | -0.77594400 | -2.70783100 |
| C | 6.99181700  | 0.96389300  | -1.02640700 |
| H | 5.44490200  | -2.29201800 | -2.48092500 |
| H | 7.37933800  | 1.89403700  | -0.62430400 |
| H | 8.34712100  | 0.88494100  | -2.69101600 |
| H | 7.38283100  | -1.20469100 | -3.61840300 |
| C | -0.61930100 | 0.46328500  | 0.42272000  |
| C | -3.45882100 | 0.19197500  | 0.12699600  |
| C | -1.22888700 | -0.72008300 | -0.16898100 |
| C | -1.54945900 | 1.49672500  | 0.85908500  |
| C | -2.89660800 | 1.36691400  | 0.70649300  |
| C | -2.57661900 | -0.84872100 | -0.29956200 |
| H | -0.60343200 | -1.51630300 | -0.55036100 |
| H | -1.17623300 | 2.38191600  | 1.35589200  |
| H | -3.56115200 | 2.13469400  | 1.08931100  |
| H | -2.99192300 | -1.72186000 | -0.79211300 |
| N | -4.82742800 | 0.06090800  | -0.02116500 |
| C | -5.71007200 | 1.06467700  | -0.45962600 |

|   |             |             |             |
|---|-------------|-------------|-------------|
| C | -7.80588800 | 2.64208700  | -1.33355400 |
| C | -7.01960300 | 0.54374400  | -0.48210200 |
| C | -5.42244100 | 2.35164100  | -0.91540800 |
| C | -6.49337700 | 3.13387700  | -1.34003500 |
| C | -8.07601900 | 1.34054700  | -0.91715600 |
| H | -4.40811700 | 2.73051400  | -0.96131300 |
| H | -6.30169100 | 4.14127900  | -1.69407900 |
| H | -9.08856100 | 0.95006300  | -0.94188900 |
| H | -8.61641000 | 3.27754400  | -1.67392400 |
| C | -5.57752200 | -1.10078700 | 0.23692500  |
| C | -7.47406600 | -3.06594000 | 0.66591600  |
| C | -5.15692100 | -2.31814500 | 0.77356100  |
| C | -6.93486400 | -0.83900000 | -0.03803200 |
| C | -7.88953000 | -1.83113500 | 0.17277200  |
| C | -6.12581200 | -3.29872900 | 0.97029700  |
| H | -4.12441100 | -2.49728900 | 1.04990000  |
| H | -8.93847100 | -1.64121400 | -0.03243700 |
| H | -5.82796200 | -4.25807400 | 1.37996100  |
| H | -8.20309300 | -3.85126400 | 0.83440400  |

**DMAC-Ph-TTR**

|   |             |             |             |
|---|-------------|-------------|-------------|
| H | 7.92974800  | -0.24310200 | -1.96350300 |
| C | 7.53526100  | 0.51216800  | -1.29178900 |
| C | 6.42795100  | 2.44865400  | 0.40319100  |
| C | 6.49531400  | 0.17542500  | -0.43251300 |
| C | 8.04201800  | 1.81142400  | -1.28012300 |
| C | 7.49234900  | 2.77543700  | -0.43668100 |
| C | 5.94343900  | 1.14591900  | 0.41396500  |
| H | 8.86030800  | 2.07234800  | -1.94299400 |
| H | 7.88076700  | 3.78827800  | -0.44090000 |
| H | 5.96347900  | 3.19132900  | 1.04343900  |
| S | 5.88489200  | -1.49766100 | -0.45252700 |
| O | 6.20556200  | -2.07316500 | -1.73884900 |
| O | 6.39525200  | -2.15446600 | 0.72442100  |
| S | 4.60400000  | 0.75036800  | 1.51290600  |
| O | 5.12639200  | -0.02573600 | 2.60642700  |
| O | 3.89789700  | 1.97267000  | 1.81428600  |
| C | 3.59208800  | -0.26267300 | 0.48560500  |
| C | 1.95097900  | -1.79366900 | -1.15530500 |
| C | 4.17334800  | -1.24842400 | -0.36496800 |
| C | 2.23855300  | -0.04301400 | 0.50708200  |
| C | 1.34341300  | -0.82115700 | -0.28519900 |
| C | 3.31183000  | -1.98590200 | -1.19913400 |
| H | 1.87906300  | 0.76830500  | 1.12945200  |
| H | 3.74436100  | -2.71142700 | -1.88044600 |
| H | 1.33634100  | -2.40601200 | -1.80324000 |
| C | -0.07108900 | -0.61422000 | -0.23186700 |
| C | -2.88998800 | -0.20854500 | -0.13697100 |
| C | -0.68385500 | 0.25706200  | 0.73174600  |
| C | -0.96799100 | -1.27548800 | -1.13881100 |
| C | -2.32811100 | -1.08884100 | -1.08438200 |
| C | -2.03995300 | 0.46552700  | 0.76876500  |
| H | -0.07705000 | 0.75311200  | 1.47901600  |
| H | -0.57776500 | -1.92603400 | -1.91091100 |
| H | -2.97805700 | -1.59185800 | -1.79547900 |
| H | -2.47240200 | 1.11808700  | 1.52240700  |
| N | -4.29544900 | -0.01032600 | -0.08629400 |
| C | -5.12992700 | -1.09600800 | 0.20586500  |
| C | -6.74080100 | -3.31541800 | 0.72779400  |
| C | -4.54972200 | -2.33864600 | 0.55120600  |

|   |             |             |             |   |             |             |             |
|---|-------------|-------------|-------------|---|-------------|-------------|-------------|
| C | -6.53354000 | -0.94421900 | 0.20289300  | H | -0.52899600 | 0.53528700  | 1.61570800  |
| C | -7.30993100 | -2.07677400 | 0.45269700  | H | -2.93107600 | 0.91751600  | 1.69215400  |
| C | -5.35072500 | -3.43766400 | 0.79571900  | H | -3.42084800 | -1.25898000 | -1.99511800 |
| H | -3.47530600 | -2.42521100 | 0.64287000  | N | -4.74582500 | 0.06520600  | -0.08476300 |
| H | -8.39142600 | -1.98821400 | 0.44627500  | C | -5.27714700 | 1.32070800  | -0.32734200 |
| H | -4.89255800 | -4.38537300 | 1.05568200  | C | -6.44689200 | 3.81987100  | -0.79728500 |
| H | -7.37744200 | -4.17304800 | 0.91679000  | C | -4.46875400 | 2.42506000  | -0.66812800 |
| C | -4.81623900 | 1.26615500  | -0.33083000 | C | -6.67575300 | 1.50163200  | -0.25369300 |
| C | -5.78594800 | 3.84768200  | -0.76525000 | C | -7.25985100 | 2.74505100  | -0.48312300 |
| C | -6.20504500 | 1.50411800  | -0.24274300 | C | -5.05273400 | 3.65441500  | -0.89459000 |
| C | -3.93916400 | 2.30712500  | -0.71407600 | H | -3.39741900 | 2.28926800  | -0.75158900 |
| C | -4.42171300 | 3.58636500  | -0.91437700 | H | -8.33796200 | 2.83400000  | -0.41365200 |
| C | -6.65529800 | 2.80847200  | -0.45202200 | H | -4.42626100 | 4.49952800  | -1.15584700 |
| H | -2.88899400 | 2.09857200  | -0.86849300 | H | -6.89026800 | 4.79253200  | -0.97841300 |
| H | -3.73712600 | 4.37625500  | -1.20255200 | C | -5.59131700 | -0.98809000 | 0.22055700  |
| H | -7.71766100 | 3.01856000  | -0.38191600 | C | -7.38322100 | -3.05389900 | 0.81801100  |
| H | -6.17358600 | 4.84881900  | -0.92014900 | C | -5.10622700 | -2.27844700 | 0.51900300  |
| C | -7.21388000 | 0.39737600  | 0.00284800  | C | -6.98512700 | -0.76330800 | 0.25511600  |
| C | -8.03477700 | 0.72762900  | 1.27218400  | C | -7.87890800 | -1.79062700 | 0.54733300  |
| H | -7.38429200 | 0.78174600  | 2.14918300  | C | -5.99614200 | -3.29192200 | 0.80957100  |
| H | -8.79316900 | -0.03865200 | 1.44899500  | H | -4.03721500 | -2.45287300 | 0.52235900  |
| H | -8.54614000 | 1.68655300  | 1.15904600  | H | -8.93984800 | -1.56871000 | 0.56048800  |
| C | -8.15870200 | 0.31208600  | -1.21965700 | H | -5.61716100 | -4.28099000 | 1.03993500  |
| H | -8.68350000 | 1.25908600  | -1.36647400 | H | -8.06944300 | -3.86104700 | 1.04824600  |
| H | -8.90880600 | -0.46831800 | -1.06982500 | O | -7.50446900 | 0.46645800  | 0.02398300  |
| H | -7.59459100 | 0.08297800  | -2.12773600 |   |             |             |             |

**PXZ-Ph-TTR**

|   |             |             |             |
|---|-------------|-------------|-------------|
| H | 7.48170700  | -0.15388700 | -1.97033000 |
| C | 7.08992900  | 0.56181600  | -1.25505000 |
| C | 5.99042100  | 2.39823100  | 0.55114700  |
| C | 6.04795500  | 0.17723400  | -0.41738700 |
| C | 7.60210300  | 1.85539300  | -1.16656800 |
| C | 7.05585500  | 2.77054100  | -0.26732700 |
| C | 5.50016500  | 1.09870000  | 0.48547300  |
| H | 8.42201900  | 2.15163800  | -1.81249600 |
| H | 7.44845400  | 3.78027000  | -0.21122700 |
| H | 5.52881800  | 3.10334600  | 1.23455300  |
| S | 5.42699400  | -1.48726700 | -0.54348600 |
| O | 5.74318300  | -1.98018900 | -1.86623000 |
| O | 5.94795900  | -2.22252700 | 0.58286600  |
| S | 4.15883000  | 0.64629500  | 1.55919000  |
| O | 4.68137500  | -0.18605500 | 2.61180200  |
| O | 3.45806500  | 1.85339700  | 1.93152200  |
| C | 3.14574000  | -0.30245500 | 0.47854600  |
| C | 1.49340800  | -1.71021600 | -1.25839400 |
| C | 3.72236100  | -1.23596300 | -0.43366700 |
| C | 1.79107100  | -0.07548700 | 0.51004400  |
| C | 0.89488900  | -0.79146000 | -0.32935200 |
| C | 2.85273500  | -1.90979800 | -1.31418000 |
| H | 1.43452200  | 0.70284200  | 1.17556400  |
| H | 3.27929700  | -2.59677000 | -2.03807800 |
| H | 0.87117500  | -2.28210800 | -1.93643000 |
| C | -0.52583200 | -0.57036000 | -0.26648800 |
| C | -3.32544000 | -0.14372100 | -0.14932800 |
| C | -1.41036500 | -1.07779200 | -1.26726300 |
| C | -1.13508300 | 0.15813900  | 0.80049700  |
| C | -2.49611500 | 0.37212400  | 0.85872600  |
| C | -2.77449700 | -0.87238700 | -1.21105500 |
| H | -1.01416500 | -1.61832400 | -2.11813000 |

**PTZ-Ph-TTR**

|   |             |             |             |
|---|-------------|-------------|-------------|
| H | 3.44635000  | -3.31622600 | -0.23115200 |
| C | 3.02011500  | -2.32069700 | -0.29708800 |
| C | 1.98508200  | 0.29630200  | -0.36666000 |
| C | 3.88712700  | -1.22809500 | -0.50761600 |
| C | 1.66815900  | -2.12880300 | -0.17439500 |
| C | 1.07558300  | -0.80162000 | -0.22027800 |
| C | 3.32566500  | 0.09550700  | -0.53191600 |
| H | 1.04450000  | -3.00036500 | -0.02494200 |
| H | 1.63826400  | 1.32270300  | -0.33682100 |
| S | 5.60000700  | -1.49633600 | -0.63047500 |
| O | 5.91340500  | -2.75643100 | 0.00033000  |
| C | 6.06851600  | -1.27160500 | -1.97261200 |
| S | 4.35785700  | 1.50737700  | -0.72833300 |
| O | 4.85716500  | 1.56631000  | -2.07542700 |
| O | 3.67701400  | 2.66106200  | -0.19264800 |
| C | 5.70457400  | 1.10401600  | 0.35676200  |
| C | 7.80966600  | 0.52017100  | 2.07398700  |
| C | 6.23790300  | -0.19187300 | 0.39807600  |
| C | 6.21145900  | 2.10060100  | 1.18276400  |
| C | 7.27931600  | 1.80853700  | 2.03068400  |
| C | 7.27981700  | -0.48853800 | 1.27007400  |
| H | 5.76212400  | 3.08783600  | 1.15823700  |
| H | 7.65900200  | -1.50414200 | 1.31352600  |
| H | 8.63081600  | 0.29284900  | 2.74548300  |
| H | 7.68579900  | 2.58650700  | 2.66797700  |
| C | -0.31521600 | -0.59591100 | -0.10301100 |
| C | -3.14802200 | -0.18201100 | 0.24706800  |
| C | -0.92299900 | 0.71622600  | -0.17708900 |
| C | -1.24590000 | -1.69159400 | 0.06774800  |
| C | -2.58662900 | -1.49437200 | 0.23278300  |
| C | -2.26058200 | 0.91254400  | -0.01022200 |
| H | -0.31157400 | 1.58330600  | -0.39065700 |
| H | -0.88628000 | -2.71161600 | 0.05380200  |

|   |             |             |             |   |             |            |             |
|---|-------------|-------------|-------------|---|-------------|------------|-------------|
| H | -3.23131100 | -2.35855800 | 0.33206500  | C | -5.09871700 | 1.31538100 | 0.34631500  |
| H | -2.65529900 | 1.91640800  | -0.10358400 | C | -6.30181100 | 3.80665500 | 0.07637100  |
| N | -4.49712600 | 0.02279500  | 0.43874100  | C | -4.72864200 | 2.35704900 | 1.19730600  |
| C | -5.42812200 | -1.05391900 | 0.56375600  | C | -6.11380500 | 1.49902000 | -0.59894400 |
| C | -7.26631200 | -3.13439000 | 0.70980800  | C | -6.71352200 | 2.75213900 | -0.73354900 |
| C | -6.47654000 | -1.12243100 | -0.36038100 | C | -5.32139700 | 3.60690000 | 1.05025400  |
| C | -5.33564600 | -1.98639800 | 1.59742100  | H | -3.97459000 | 2.18060100 | 1.95818700  |
| C | -6.24775100 | -3.03496800 | 1.65967900  | H | -7.50546700 | 2.89027000 | -1.46264300 |
| C | -7.39522300 | -2.17060600 | -0.28610300 | H | -5.02488700 | 4.42133500 | 1.70204200  |
| H | -4.54644300 | -1.88593300 | 2.33615600  | H | -6.76729600 | 4.78007700 | -0.03491700 |
| H | -6.16938100 | -3.76781600 | 2.45524900  | S | -6.62770700 | 0.13312400 | -1.59177100 |
| H | -8.21131400 | -2.21759500 | -0.99997700 |   |             |            |             |
| H | -7.98024100 | -3.94945900 | 0.76126600  |   |             |            |             |
